# Supplementary material for: Genome-wide transcriptome profiling of radish (Raphanus sativus L.) in response to vernalization
Source: PLoS One. 2017 May 12;12(5):e0177594. doi: 10.1371/journal.pone.0177594 (PMC5428929; doi:10.1371/journal.pone.0177594)
Supplement: S2 Table — (XLS) [file pone.0177594.s006.xls]

## Sheet: S2 table
Table S2. Overview of the mapping result.
ID	VE1	VE2	VE3	VL1	VL2	VL3	RT1	RT2	RT3	VE1_VE2_VE3_vs_VL1_VL2_VL3_FDR	VE1_VE2_VE3_vs_VL1_VL2_VL3_log2FC	VE1_VE2_VE3_vs_VL1_VL2_VL3_regulated	RT1_RT2_RT3_vs_VE1_VE2_VE3_FDR	RT1_RT2_RT3_vs_VE1_VE2_VE3_log2FC	RT1_RT2_RT3_vs_VE1_VE2_VE3_regulated	RT1_RT2_RT3_vs_VL1_VL2_VL3_FDR	RT1_RT2_RT3_vs_VL1_VL2_VL3_log2FC	RT1_RT2_RT3_vs_VL1_VL2_VL3_regulated	GO_annotation	KEGG_annotation
RSG00001	0	0	0	0	0	0	0	0	0	--	--	--	--	--	--	--	--	--	Molecular Function: DNA binding (GO:0003677);; Molecular Function: sequence-specific DNA binding transcription factor activity (GO:0003700);; Cellular Component: nucleus (GO:0005634);;	--
RSG00002	0.25056	0.419033	0	0	0.260337	0	0	0.155451	0	--	--	--	--	--	--	--	--	--	--	K03233|1.32954e-13|brp:103843341|probable elongation factor 1-gamma 1; K03233 elongation factor 1-gamma (A)
RSG00003	0	0.748521	0	0.11201	0	0	0	0	0	--	--	--	--	--	--	--	--	--	Cellular Component: extracellular region (GO:0005576);; Biological Process: unidimensional cell growth (GO:0009826);; Biological Process: plant-type cell wall loosening (GO:0009828);; Biological Process: plant-type cell wall modification involved in multidimensional cell growth (GO:0009831);; Cellular Component: membrane (GO:0016020);; Biological Process: petal morphogenesis (GO:0048446);; Biolog…	--
RSG00004	0	0	0	0	0	0	0	0	0	--	--	--	--	--	--	--	--	--	--	--
RSG00005	13.1658	12.4228	11.2015	7.80683	9.15796	8.81735	12.0973	15.5154	16.3947	0.254853	-0.519737	normal	0.551971	-0.266162	normal	0.0556153	-0.766597	normal	Molecular Function: nucleotide binding (GO:0000166);; Cellular Component: cytosol (GO:0005829);; Cellular Component: plasma membrane (GO:0005886);; Molecular Function: dTDP-4-dehydrorhamnose 3,5-epimerase activity (GO:0008830);; Molecular Function: dTDP-4-dehydrorhamnose reductase activity (GO:0008831);; Cellular Component: plasmodesma (GO:0009506);; Biological Process: UDP-rhamnose biosynthetic …	K12451|0|brp:103871990|probable rhamnose biosynthetic enzyme 1; K12451 3,5-epimerase/4-reductase [EC:5.1.3.- 1.1.1.-] (A)
RSG00006	0	0	0	0	0	0	0	0	0	--	--	--	--	--	--	--	--	--	Cellular Component: extracellular region (GO:0005576);; Biological Process: alcohol metabolic process (GO:0006066);; Molecular Function: choline dehydrogenase activity (GO:0008812);; Molecular Function: aldehyde-lyase activity (GO:0016832);; Molecular Function: flavin adenine dinucleotide binding (GO:0050660);; Biological Process: oxidation-reduction process (GO:0055114);;	--
RSG00007	2.89905	0	0.1194	1.55855	1.64929	0	0.232886	0.975346	0.704501	1	0.0513576	normal	--	--	--	0.623811	0.8721	normal	Molecular Function: sequence-specific DNA binding transcription factor activity (GO:0003700);; Cellular Component: nucleus (GO:0005634);; Biological Process: regulation of transcription, DNA-templated (GO:0006355);; Biological Process: response to heat (GO:0009408);; Biological Process: response to water deprivation (GO:0009414);; Biological Process: response to salt stress (GO:0009651);; Biologi…	--
RSG00008	26.4274	24.9714	24.8249	25.5315	24.9146	28.3012	34.6902	33.7342	33.5178	0.93955	0.0486993	normal	0.235614	-0.410603	normal	0.36414	-0.343457	normal	Cellular Component: extracellular region (GO:0005576);; Cellular Component: endoplasmic reticulum (GO:0005783);; Cellular Component: plasma membrane (GO:0005886);; Biological Process: intra-Golgi vesicle-mediated transport (GO:0006891);; Biological Process: autophagy (GO:0006914);; Biological Process: response to symbiotic fungus (GO:0009610);; Biological Process: organ senescence (GO:0010260);; …	K13519|0|brp:103871988|lysophospholipid acyltransferase 1; K13519 lysophospholipid acyltransferase [EC:2.3.1.51 2.3.1.23 2.3.1.-] (A)
RSG00009	0	0	0	0	0	0	0	0	0	--	--	--	--	--	--	--	--	--	--	--
RSG00010	0	0	0	0	0	0	0	0	0	--	--	--	--	--	--	--	--	--	--	--
RSG00011	4.68371	3.96042	4.53154	5.12574	5.25461	6.12594	7.65653	7.71529	7.16072	0.611664	0.310986	normal	0.0860402	-0.753159	normal	0.368838	-0.42281	normal	Molecular Function: protein serine/threonine kinase activity (GO:0004674);; Molecular Function: ATP binding (GO:0005524);; Cellular Component: nucleus (GO:0005634);; Biological Process: protein phosphorylation (GO:0006468);;	--
RSG00012	1.24061	0.925937	0.784084	2.53263	2.36377	1.75754	1.26216	0.467441	0.682478	0.306536	1.23785	normal	--	--	--	0.12252	1.55005	normal	Cellular Component: nucleus (GO:0005634);; Molecular Function: carbohydrate binding (GO:0030246);;	--
RSG00013	0	0.159529	0	0	0	0.0698284	0.12753	0	0.261051	--	--	--	--	--	--	--	--	--	Molecular Function: monooxygenase activity (GO:0004497);; Molecular Function: iron ion binding (GO:0005506);; Cellular Component: mitochondrion (GO:0005739);; Biological Process: iron ion transport (GO:0006826);; Molecular Function: electron carrier activity (GO:0009055);; Biological Process: cellular response to iron ion starvation (GO:0010106);; Biological Process: response to nitrate (GO:00101…	--
RSG00014	0.298142	1.32724	1.29436	0.364364	2.1666	0.593443	0.931197	1.43681	0.613876	0.965043	0.155732	normal	0.924127	-0.164975	normal	1	0.0276767	normal	Molecular Function: serine-type endopeptidase activity (GO:0004252);; Cellular Component: mitochondrion (GO:0005739);; Cellular Component: Golgi apparatus (GO:0005794);; Biological Process: proteolysis (GO:0006508);; Cellular Component: plasmodesma (GO:0009506);; Cellular Component: integral component of membrane (GO:0016021);;	--
RSG00015	81.8822	77.3393	72.3843	75.193	65.7842	90.0996	103.77	121.764	91.6841	1	0.00629783	normal	0.22459	-0.393419	normal	0.28519	-0.366771	normal	Molecular Function: ubiquitin-protein transferase activity (GO:0004842);; Cellular Component: nucleus (GO:0005634);; Molecular Function: zinc ion binding (GO:0008270);; Cellular Component: chloroplast (GO:0009507);; Biological Process: protein ubiquitination (GO:0016567);;	--
RSG00016	53.0847	46.7912	55.6215	111.981	83.0596	73.9317	154.917	106.359	96.6241	0.0114166	0.818338	normal	0.00067074	-1.19215	down	0.394493	-0.357867	normal	Molecular Function: nucleotide binding (GO:0000166);; Molecular Function: UDP-glucose 4-epimerase activity (GO:0003978);; Cellular Component: Golgi apparatus (GO:0005794);; Cellular Component: cytosol (GO:0005829);; Cellular Component: plasma membrane (GO:0005886);; Biological Process: pollen development (GO:0009555);; Biological Process: cellular metabolic process (GO:0044237);; Biological Proce…	K01784|0|brp:103836145|bifunctional UDP-glucose 4-epimerase and UDP-xylose 4-epimerase 1; K01784 UDP-glucose 4-epimerase [EC:5.1.3.2] (A)
RSG00017	17.5674	18.5539	25.4529	19.669	18.9761	15.9927	10.6581	11.2216	11.0371	0.692939	-0.174264	normal	0.00243808	0.929275	normal	0.0181723	0.773262	normal	Molecular Function: RNA binding (GO:0003723);; Biological Process: pentose-phosphate shunt (GO:0006098);; Biological Process: phosphatidylglycerol biosynthetic process (GO:0006655);; Biological Process: aromatic amino acid family biosynthetic process (GO:0009073);; Cellular Component: chloroplast (GO:0009507);; Biological Process: chloroplast relocation (GO:0009902);; Biological Process: thylakoi…	--
RSG00018	0	0	0	0	0	0	5.47129	0	0	--	--	--	--	--	--	--	--	--	Molecular Function: nucleotide binding (GO:0000166);; Cellular Component: mitochondrion (GO:0005739);;	--
RSG00019	20.5242	11.7607	14.3035	11.3049	6.58174	14.2426	13.2013	9.70169	7.60585	0.418324	-0.523265	normal	0.210424	0.635538	normal	0.867277	0.128745	normal	Biological Process: protein targeting to mitochondrion (GO:0006626);; Biological Process: embryo sac egg cell differentiation (GO:0009560);;	--
RSG00020	49.1517	54.8006	56.3908	53.6966	42.6918	38.6311	43.7357	39.145	46.066	0.537571	-0.243571	normal	0.364034	0.304873	normal	0.865618	0.0764956	normal	Cellular Component: vacuolar proton-transporting V-type ATPase, V1 domain (GO:0000221);; Cellular Component: plant-type vacuole (GO:0000325);; Cellular Component: Golgi apparatus (GO:0005794);; Cellular Component: cytosol (GO:0005829);; Cellular Component: plasma membrane (GO:0005886);; Biological Process: glucose catabolic process (GO:0006007);; Biological Process: ubiquitin-dependent protein ca…	K02148|0|brp:103871975|V-type proton ATPase subunit C; K02148 V-type H+transporting ATPase subunit C (A)
RSG00021	5.99137	3.88799	8.14724	4.21542	2.53931	3.77999	2.8385	1.8202	4.01518	0.256257	-0.801803	normal	0.166721	0.84417	normal	0.958982	0.0538738	normal	Molecular Function: DNA binding (GO:0003677);; Molecular Function: sequence-specific DNA binding transcription factor activity (GO:0003700);; Cellular Component: nucleus (GO:0005634);; Biological Process: response to xenobiotic stimulus (GO:0009410);; Biological Process: photomorphogenesis (GO:0009640);; Biological Process: embryo development ending in seed dormancy (GO:0009793);; Biological Proc…	--
RSG00022	0	0.199871	0	0.465342	0	0.78761	0	0	0.201632	--	--	--	--	--	--	--	--	--	Cellular Component: mitochondrion (GO:0005739);; Molecular Function: bis(5'-adenosyl)-pentaphosphatase activity (GO:0034432);;	K07766|4.01368e-95|eus:EUTSA_v10008801mg|hypothetical protein; K07766 diphosphoinositol-polyphosphate diphosphatase [EC:3.6.1.52] (A)
RSG00023	8.93196	5.94566	12.3722	16.8862	11.2659	15.722	11.6928	5.10458	11.3694	0.202581	0.681962	normal	0.983987	0.026407	normal	0.156983	0.717585	normal	Cellular Component: mitochondrion (GO:0005739);; Molecular Function: hydrolase activity (GO:0016787);;	K07766|2.62252e-116|brp:103871971|nudix hydrolase 12, mitochondrial; K07766 diphosphoinositol-polyphosphate diphosphatase [EC:3.6.1.52] (A)
RSG00024	143.505	102.076	148.776	98.5515	81.1443	115.521	93.4763	97.7587	119.735	0.25684	-0.381359	normal	0.330176	0.321858	normal	0.935559	-0.0432642	normal	Cellular Component: cytosol (GO:0005829);; Biological Process: glycolytic process (GO:0006096);; Biological Process: rRNA processing (GO:0006364);; Cellular Component: chloroplast stroma (GO:0009570);; Biological Process: plastid organization (GO:0009657);; Biological Process: photosynthetic electron transport in photosystem I (GO:0009773);; Cellular Component: chloroplast envelope (GO:0009941);;…	K05298|0|brp:103871970|BcGAPDH; glyceraldehyde-3-phosphate dehydrogenase A, chloroplastic; K05298 glyceraldehyde-3-phosphate dehydrogenase (NADP) (phosphorylating) [EC:1.2.1.13] (A)
RSG00025	0	0	0	0	0	0	0	0	0	--	--	--	--	--	--	--	--	--	--	--
RSG00026	0.674869	1.01321	1.6936	0.52275	1.74721	1.58082	1.0025	0.446356	1.03223	0.970637	0.140606	normal	--	--	--	0.663278	0.620043	normal	--	K15436|7.01561e-78|crb:CARUB_v10011575mg|hypothetical protein; K15436 transportin-3 (A)
RSG00027	0	0.772454	1.25268	0.87856	0.545023	0	1.77998	2.92599	1.50393	--	--	--	--	--	--	--	--	--	Molecular Function: nucleic acid binding (GO:0003676);;	--
RSG00028	0	0	0	0	0	0	0	0	0	--	--	--	--	--	--	--	--	--	--	--
RSG00029	0	0	0	0	0	0	0	0	0	--	--	--	--	--	--	--	--	--	--	--
RSG00030	0	0	0.133347	0	0	0	0	0	0.110541	--	--	--	--	--	--	--	--	--	Molecular Function: protein binding (GO:0005515);; Cellular Component: nucleus (GO:0005634);; Cellular Component: cytosol (GO:0005829);; Biological Process: transcription, DNA-templated (GO:0006351);; Biological Process: response to cytokinin (GO:0009735);; Biological Process: embryonic pattern specification (GO:0009880);; Biological Process: specification of organ axis polarity (GO:0010084);; Bi…	--
RSG00031	17.4613	15.8569	13.6163	16.2946	18.3242	14.4311	14.3647	12.4192	15.2919	0.944812	0.0518918	normal	0.748776	0.161523	normal	0.637682	0.2309	normal	Molecular Function: beta-1,4-mannosylglycoprotein 4-beta-N-acetylglucosaminyltransferase activity (GO:0003830);; Cellular Component: Golgi apparatus (GO:0005794);; Biological Process: protein N-linked glycosylation (GO:0006487);; Cellular Component: membrane (GO:0016020);;	K00737|0|brp:103871967|uncharacterized LOC103871967; K00737 beta-1,4-mannosyl-glycoprotein beta-1,4-N-acetylglucosaminyltransferase [EC:2.4.1.144] (A)
RSG00032	34.6949	30.6971	28.5243	45.8368	47.3143	43.6739	36.6544	40.6016	28.1189	0.0645299	0.568586	normal	0.646502	-0.169691	normal	0.222798	0.420342	normal	Cellular Component: nucleus (GO:0005634);; Cellular Component: Golgi apparatus (GO:0005794);; Molecular Function: transferase activity, transferring glycosyl groups (GO:0016757);;	--
RSG00033	6.40484	6.97994	9.0918	5.05505	5.04525	5.36577	3.82943	4.82833	3.97589	0.223608	-0.5319	normal	0.0444241	0.827825	normal	0.549727	0.316064	normal	Cellular Component: nucleus (GO:0005634);; Biological Process: chromatin assembly or disassembly (GO:0006333);; Biological Process: methylation-dependent chromatin silencing (GO:0006346);; Biological Process: pyrimidine ribonucleotide biosynthetic process (GO:0009220);; Biological Process: regulation of flower development (GO:0009909);; Molecular Function: U1 snRNA binding (GO:0030619);; Molecula…	K13150|0|brp:103871964|coilin-like; K13150 coilin (A)
RSG00034	2.32783	3.13599	2.82601	1.68227	1.4375	1.9653	1.71215	1.89639	2.26507	0.273023	-0.731119	normal	0.385585	0.555055	normal	0.869083	-0.159532	normal	Cellular Component: mitochondrion (GO:0005739);; Cellular Component: vacuolar membrane (GO:0005774);; Biological Process: abscisic acid biosynthetic process (GO:0009688);;	--
RSG00035	4.36568	7.09844	8.94754	5.90484	6.56174	5.43603	5.39294	6.7325	7.65033	0.825895	-0.158675	normal	0.980953	0.0211796	normal	0.861786	-0.119332	normal	Biological Process: response to molecule of bacterial origin (GO:0002237);; Molecular Function: monooxygenase activity (GO:0004497);; Molecular Function: iron ion binding (GO:0005506);; Biological Process: tryptophan catabolic process (GO:0006569);; Biological Process: protein targeting to membrane (GO:0006612);; Molecular Function: electron carrier activity (GO:0009055);; Biological Process: sys…	--
RSG00036	2.35521	4.66987	2.08475	3.8837	6.66889	4.24011	0.943326	4.9034	5.36343	0.255334	0.729061	normal	0.744437	-0.36402	normal	0.675493	0.387987	normal	Biological Process: response to molecule of bacterial origin (GO:0002237);; Molecular Function: monooxygenase activity (GO:0004497);; Molecular Function: iron ion binding (GO:0005506);; Biological Process: tryptophan catabolic process (GO:0006569);; Biological Process: protein targeting to membrane (GO:0006612);; Molecular Function: electron carrier activity (GO:0009055);; Biological Process: sys…	--
RSG00037	0.0422722	0.0887124	0	0	0	0	0	0.0884328	0	--	--	--	--	--	--	--	--	--	Molecular Function: hydrolase activity, hydrolyzing O-glycosyl compounds (GO:0004553);; Biological Process: carbohydrate metabolic process (GO:0005975);; Cellular Component: chloroplast (GO:0009507);; Molecular Function: cation binding (GO:0043169);;	--
RSG00038	0	0	0	0	0	0	0	0	0	--	--	--	--	--	--	--	--	--	Molecular Function: monooxygenase activity (GO:0004497);; Molecular Function: iron ion binding (GO:0005506);; Molecular Function: electron carrier activity (GO:0009055);; Biological Process: pollen exine formation (GO:0010584);; Molecular Function: oxidoreductase activity, acting on paired donors, with incorporation or reduction of molecular oxygen (GO:0016705);; Molecular Function: oxygen bindin…	K15402|0|brp:103872200|cytochrome P450 86B1; K15402 fatty acid omega-hydroxylase [EC:1.14.-.-] (A)
RSG00039	5.34963	6.84956	6.98458	4.52905	4.46745	3.97767	6.12565	4.49498	6.4697	0.147292	-0.56627	normal	0.540381	0.259982	normal	0.532219	-0.290909	normal	Molecular Function: phospholipid binding (GO:0005543);; Cellular Component: nucleus (GO:0005634);; Molecular Function: oxysterol binding (GO:0008142);; Biological Process: steroid metabolic process (GO:0008202);;	--
RSG00040	6.20677	7.98415	4.91347	8.71964	9.93633	7.66334	7.97493	6.63252	6.75126	0.384489	0.466478	normal	0.78945	-0.16318	normal	0.548871	0.322013	normal	Molecular Function: actin binding (GO:0003779);; Molecular Function: structural constituent of cytoskeleton (GO:0005200);; Molecular Function: ATP binding (GO:0005524);; Cellular Component: cytosol (GO:0005829);; Cellular Component: Arp2/3 protein complex (GO:0005885);; Biological Process: multidimensional cell growth (GO:0009825);; Biological Process: trichome morphogenesis (GO:0010090);; Biolog…	K18584|0|brp:103871955|actin-related protein 3; K18584 actin-related protein 3 (A)
RSG00041	0	0	0	0	0	0	0	0	0	--	--	--	--	--	--	--	--	--	Cellular Component: cytoplasm (GO:0005737);; Cellular Component: plasmodesma (GO:0009506);; Molecular Function: 1-aminocyclopropane-1-carboxylate oxidase activity (GO:0009815);; Biological Process: regulation of glucosinolate biosynthetic process (GO:0010439);; Molecular Function: oxidoreductase activity, acting on single donors with incorporation of molecular oxygen, incorporation of two atoms o…	--
RSG00042	0.727421	2.21634	0.688818	0.00106161	1.00298	2.82168	14.1783	3.67488	13.0599	0.990129	0.0807578	normal	0.00514877	-3.0752	down	0.0114616	-2.9781	normal	Molecular Function: nucleotide binding (GO:0000166);; Molecular Function: RNA binding (GO:0003723);; Cellular Component: nucleus (GO:0005634);;	K14398|2.66333e-144|brp:103871953|heterogeneous nuclear ribonucleoprotein 87F; K14398 cleavage and polyadenylation specificity factor subunit 6/7 (A)
RSG00043	11.7373	12.2813	12.5306	15.5118	15.5862	15.1481	16.5646	16.759	11.2316	0.530551	0.373576	normal	0.569683	-0.312926	normal	0.91283	0.0816348	normal	Cellular Component: nucleus (GO:0005634);; Molecular Function: zinc ion binding (GO:0008270);; Biological Process: response to chitin (GO:0010200);; Molecular Function: ligase activity (GO:0016874);;	--
RSG00044	0	0.0168901	0.0196774	0.019431	0.084008	0.0226754	0.0207952	0.0166627	0.0343167	--	--	--	--	--	--	--	--	--	Molecular Function: magnesium ion binding (GO:0000287);; Molecular Function: phospholipid-translocating ATPase activity (GO:0004012);; Molecular Function: calmodulin binding (GO:0005516);; Molecular Function: ATP binding (GO:0005524);; Cellular Component: plasma membrane (GO:0005886);; Biological Process: cation transport (GO:0006812);; Molecular Function: ATPase activity, coupled to transmembran…	K01530|0|brp:103871952|putative phospholipid-transporting ATPase 11; K01530 phospholipid-translocating ATPase [EC:3.6.3.1] (A)
RSG00045	14.4781	13.4356	14.7314	9.45325	8.21019	12.482	10.1822	11.5302	9.42129	0.127302	-0.490058	normal	0.146693	0.459277	normal	0.986265	-0.0114296	normal	Cellular Component: nucleoplasm (GO:0005654);; Biological Process: chromatin silencing (GO:0006342);; Biological Process: nucleus organization (GO:0006997);; Biological Process: cell-cell signaling (GO:0007267);; Biological Process: virus induced gene silencing (GO:0009616);; Biological Process: vegetative phase change (GO:0010050);; Biological Process: production of ta-siRNAs involved in RNA int…	--
RSG00046	1.14674	1.2989	1.95662	0.506074	0.699043	1.48167	0.53053	0.244538	0.819192	0.602083	-0.692979	normal	0.117225	1.54793	normal	--	--	--	Biological Process: response to molecule of bacterial origin (GO:0002237);; Cellular Component: plasma membrane (GO:0005886);; Biological Process: signal transduction (GO:0007165);; Cellular Component: chloroplast (GO:0009507);; Biological Process: response to symbiotic fungus (GO:0009610);; Biological Process: stomatal complex morphogenesis (GO:0010103);; Biological Process: symbiosis, encompass…	--
RSG00047	0	0	0	0	0	0	0	0	0	--	--	--	--	--	--	--	--	--	--	--
RSG00048	0	0.0861192	0.100664	0	0	0	0	0.0853479	0	--	--	--	--	--	--	--	--	--	Cellular Component: mitochondrion (GO:0005739);; Biological Process: embryo development ending in seed dormancy (GO:0009793);; Cellular Component: chloroplast envelope (GO:0009941);;	--
RSG00049	1.52279	1.40402	1.38409	1.54571	1.59789	1.41935	3.05713	1.41687	1.65237	0.892813	0.174046	normal	0.591092	-0.426137	normal	0.798758	-0.234405	normal	--	--
RSG00051	49.2148	42.4473	61.9098	43.0405	45.5655	40.1242	38.5807	30.5009	31.7566	0.553661	-0.243396	normal	0.058853	0.607857	normal	0.30332	0.382471	normal	Cellular Component: Golgi apparatus (GO:0005794);; Biological Process: carbohydrate biosynthetic process (GO:0016051);; Molecular Function: polygalacturonate 4-alpha-galacturonosyltransferase activity (GO:0047262);;	--
RSG00052	0	0	0	0	0	0	0	0	0	--	--	--	--	--	--	--	--	--	--	--
RSG00053	0	0	0	0	0	0	0	0	0.237927	--	--	--	--	--	--	--	--	--	--	--
RSG00054	111.856	85.6511	105.88	168.515	159.799	181.467	70.9384	79.7556	66.112	0.0102073	0.737277	normal	0.0981777	0.508905	normal	9.38779e-06	1.26576	up	Molecular Function: DNA binding (GO:0003677);; Molecular Function: sequence-specific DNA binding transcription factor activity (GO:0003700);; Cellular Component: nucleus (GO:0005634);; Biological Process: protein targeting to membrane (GO:0006612);; Biological Process: response to brassinosteroid (GO:0009741);; Biological Process: negative regulation of flower development (GO:0009910);; Biologica…	K09287|0|brp:103871946|AP2/ERF and B3 domain-containing transcription factor RAV1; K09287 RAV-like factor (A)
RSG00055	0	0	0	0	0	0	0	0	0	--	--	--	--	--	--	--	--	--	Molecular Function: nucleic acid binding (GO:0003676);; Molecular Function: sequence-specific DNA binding transcription factor activity (GO:0003700);; Cellular Component: nucleus (GO:0005634);; Biological Process: regulation of transcription, DNA-templated (GO:0006355);; Molecular Function: zinc ion binding (GO:0008270);; Biological Process: phloem or xylem histogenesis (GO:0010087);; Biological …	--
RSG00056	0	0.145662	0	0	0.35346	0	0	0.0715704	0	--	--	--	--	--	--	--	--	--	Biological Process: transition metal ion transport (GO:0000041);; Molecular Function: DNA binding (GO:0003677);; Molecular Function: chromatin binding (GO:0003682);; Molecular Function: sequence-specific DNA binding transcription factor activity (GO:0003700);; Molecular Function: histidine-tRNA ligase activity (GO:0004821);; Cellular Component: nucleus (GO:0005634);; Cellular Component: mitochond…	--
RSG00057	9.66282	7.62124	11.6845	9.31441	5.1966	8.0561	4.91338	4.84652	6.44768	0.533022	-0.35839	normal	0.110517	0.768551	normal	0.45112	0.422409	normal	Biological Process: phosphorelay signal transduction system (GO:0000160);; Cellular Component: nucleus (GO:0005634);; Cellular Component: cytosol (GO:0005829);; Biological Process: DNA-dependent DNA replication (GO:0006261);; Biological Process: double-strand break repair (GO:0006302);; Molecular Function: histidine phosphotransfer kinase activity (GO:0009927);; Biological Process: regulation of …	K06695|8.73603e-158|brp:103871941|homologous-pairing protein 2 homolog; K06695 26S proteasome regulatory subunit, ATPase 3, interacting protein (A)
RSG00058	0	0.111141	0.189523	0.190039	0.341117	0.293703	0.271466	0.331499	0.446506	--	--	--	--	--	--	--	--	--	Cellular Component: cytoplasm (GO:0005737);; Biological Process: response to oxidative stress (GO:0006979);; Biological Process: salicylic acid biosynthetic process (GO:0009697);; Biological Process: salicylic acid mediated signaling pathway (GO:0009863);; Biological Process: negative regulation of defense response (GO:0031348);; Biological Process: innate immune response (GO:0045087);;	--
RSG00059	11.1076	15.9573	15.3019	11.4729	21.4047	10.2264	14.8573	22.5604	13.3666	1	0.0066362	normal	0.689346	-0.256917	normal	0.739956	-0.222856	normal	Cellular Component: nucleus (GO:0005634);;	--
RSG00060	18.8791	18.4716	23.772	14.418	14.2657	7.18702	34.7465	24.4622	37.2577	0.202866	-0.76031	normal	0.173664	-0.661361	normal	0.00258072	-1.40731	down	Cellular Component: extracellular region (GO:0005576);;	--
RSG00061	22.3275	25.8966	23.8213	23.9574	18.3185	20.9572	42.1149	53.943	34.456	0.993094	-0.0184817	normal	0.0238152	-0.87243	normal	0.0230968	-0.867445	normal	--	--
RSG00062	0	0	0	0	0	0	0	0	0	--	--	--	--	--	--	--	--	--	Cellular Component: intracellular (GO:0005622);; Biological Process: specification of floral organ identity (GO:0010093);; Molecular Function: metal ion binding (GO:0046872);; Biological Process: carpel development (GO:0048440);; Biological Process: anther development (GO:0048653);;	--
RSG00063	0	0	0.0304913	0.0298114	0.095796	0	0.0317969	0	0.0534388	--	--	--	--	--	--	--	--	--	Molecular Function: lactoylglutathione lyase activity (GO:0004462);; Molecular Function: prephenate dehydratase activity (GO:0004664);; Biological Process: L-phenylalanine biosynthetic process (GO:0009094);; Cellular Component: chloroplast (GO:0009507);; Biological Process: vernalization response (GO:0010048);; Molecular Function: amino acid binding (GO:0016597);; Biological Process: anthocyanin …	K05359|0|brp:103871931|arogenate dehydratase/prephenate dehydratase 1, chloroplastic; K05359 arogenate/prephenate dehydratase [EC:4.2.1.91 4.2.1.51] (A)
RSG00064	0	0	0	0	0	0.115187	0	0	0	--	--	--	--	--	--	--	--	--	Cellular Component: Golgi apparatus (GO:0005794);; Cellular Component: plasma membrane (GO:0005886);; Molecular Function: UDP-N-acetylmuramate dehydrogenase activity (GO:0008762);; Molecular Function: electron carrier activity (GO:0009055);; Molecular Function: flavin adenine dinucleotide binding (GO:0050660);; Biological Process: oxidation-reduction process (GO:0055114);;	--
RSG00065	7.30923	6.2172	7.34171	4.998	4.60114	6.16334	4.6112	4.62973	5.85545	0.480485	-0.410884	normal	0.345042	0.489648	normal	0.902531	0.0953611	normal	Biological Process: protein N-linked glycosylation (GO:0006487);; Biological Process: response to water deprivation (GO:0009414);; Biological Process: response to low light intensity stimulus (GO:0009645);; Biological Process: dolichol biosynthetic process (GO:0019408);; Biological Process: endoplasmic reticulum unfolded protein response (GO:0030968);; Molecular Function: dehydrodolichyl diphosph…	K11778|1.63935e-136|brp:103871927|nogo-B receptor-like; K11778 ditrans,polycis-polyprenyl diphosphate synthase [EC:2.5.1.87] (A)
RSG00066	3.75989	2.26112	0	0	7.85259	1.50835	1.53153	4.70486	2.69902	--	--	--	--	--	--	--	--	--	--	--
RSG00067	0	0.0539348	0.0625955	0.122772	0.0658407	0.0720508	0.132554	0.10615	0.328605	--	--	--	--	--	--	--	--	--	Cellular Component: Golgi apparatus (GO:0005794);; Biological Process: protein glycosylation (GO:0006486);; Molecular Function: galactosyltransferase activity (GO:0008378);; Cellular Component: integral component of membrane (GO:0016021);;	--
RSG00068	0.304737	0.34969	0.375567	0.209955	0.407878	0.191589	0.28583	0.484932	0.146022	0.780093	-0.358464	normal	0.831301	0.226099	normal	0.94753	-0.0990684	normal	Cellular Component: mitochondrion (GO:0005739);; Biological Process: amino acid transport (GO:0006865);; Molecular Function: starch synthase activity (GO:0009011);; Cellular Component: plant-type cell wall (GO:0009505);; Cellular Component: chloroplast (GO:0009507);; Molecular Function: strictosidine synthase activity (GO:0016844);; Biological Process: starch biosynthetic process (GO:0019252);; M…	--
RSG00069	4.19997	4.35734	4.3522	6.9671	5.14677	4.77131	5.66739	6.4248	4.8023	0.538649	0.465888	normal	0.624153	-0.34788	normal	0.870993	0.1363	normal	Cellular Component: chloroplast (GO:0009507);;	--
RSG00070	0	0	0	0	0	0	0.366923	0.604517	0.292589	--	--	--	--	--	--	--	--	--	Cellular Component: nucleus (GO:0005634);;	--
RSG00071	70.0621	89.2662	50.2891	87.8867	84.9768	64.0733	105.639	140.378	80.1215	0.738352	0.191386	normal	0.206805	-0.635239	normal	0.359677	-0.420349	normal	Biological Process: RNA splicing, via endonucleolytic cleavage and ligation (GO:0000394);; Molecular Function: iron ion binding (GO:0005506);; Cellular Component: extracellular region (GO:0005576);; Cellular Component: endoplasmic reticulum (GO:0005783);; Cellular Component: Golgi apparatus (GO:0005794);; Cellular Component: plasma membrane (GO:0005886);; Molecular Function: methyltransferase act…	K05917|0|brp:103871918|sterol 14-demethylase; K05917 sterol 14-demethylase [EC:1.14.13.70] (A)
RSG00072	24.891	24.5245	29.1476	23.5918	22.4304	26.4903	19.4488	19.2659	19.0045	0.92377	-0.0522564	normal	0.264421	0.359723	normal	0.361589	0.325212	normal	Molecular Function: ATP binding (GO:0005524);; Cellular Component: nucleus (GO:0005634);; Biological Process: protein folding (GO:0006457);;	K09489|0|brp:103871917|heat shock 70 kDa protein 16; K09489 heat shock 70kDa protein 4 (A)
RSG00073	0	1.0588	0	0	0.663023	0	0	0	0	--	--	--	--	--	--	--	--	--	Cellular Component: mitochondrion (GO:0005739);;	--
RSG00074	9.8199	6.67182	11.7729	11.2175	12.2285	10.495	12.4784	14.9825	11.8459	0.666081	0.24537	normal	0.333785	-0.42612	normal	0.761861	-0.159542	normal	Cellular Component: mitochondrion (GO:0005739);; Biological Process: chromatin assembly or disassembly (GO:0006333);; Cellular Component: membrane (GO:0016020);;	--
RSG00075	0.381081	0.470389	0.101141	0.499339	0.82426	0.233583	0.820561	1.05219	1.06833	0.628219	0.748674	normal	0.0546707	-1.6609	normal	0.316124	-0.889355	normal	Molecular Function: nucleotide binding (GO:0000166);; Molecular Function: protein kinase activity (GO:0004672);; Biological Process: phosphorylation (GO:0016310);;	--
RSG00076	0	0	0	0	0	0	0	0.784027	1.43923	--	--	--	--	--	--	--	--	--	--	--
RSG00077	25.4463	24.897	15.7614	30.2337	34.9922	21.4544	56.6292	34.595	53.3879	0.399575	0.394113	normal	0.0025127	-1.15036	down	0.0710319	-0.740768	normal	Molecular Function: hydrolase activity, hydrolyzing O-glycosyl compounds (GO:0004553);; Cellular Component: cell wall (GO:0005618);; Biological Process: cellular glucan metabolic process (GO:0006073);; Molecular Function: xyloglucan:xyloglucosyl transferase activity (GO:0016762);; Cellular Component: apoplast (GO:0048046);;	K08235|0|brp:103871910|probable xyloglucan endotransglucosylase/hydrolase protein 8; K08235 xyloglucan:xyloglucosyl transferase [EC:2.4.1.207] (A)
RSG00078	27.4342	23.5625	22.3881	20.6004	16.0167	23.7558	6.27042	10.4886	8.6446	0.487366	-0.28713	normal	2.37816e-06	1.56163	up	0.000153239	1.29396	up	Cellular Component: nucleus (GO:0005634);; Cellular Component: cytoplasmic part (GO:0044444);;	--
RSG00079	1.05651	0.559098	0.22373	0.429348	0.235884	0	0.894203	0.369426	0.190037	--	--	--	--	--	--	--	--	--	--	--
RSG00080	0.0650777	0.48535	0.249671	0.32072	0.3425	0.18385	0.171245	0.418074	0.426189	--	--	--	--	--	--	--	--	--	Molecular Function: nucleic acid binding (GO:0003676);; Molecular Function: sequence-specific DNA binding transcription factor activity (GO:0003700);; Molecular Function: NAD ADP-ribosyltransferase activity (GO:0003950);; Cellular Component: intracellular (GO:0005622);; Biological Process: regulation of transcription, DNA-templated (GO:0006355);; Molecular Function: zinc ion binding (GO:0008270);;	--
RSG00081	20.356	21.5734	17.6963	31.1505	24.9307	23.7345	50.6278	42.9659	40.8832	0.211273	0.424214	normal	5.89168e-05	-1.13478	down	0.0259397	-0.693823	normal	Cellular Component: nucleus (GO:0005634);;	--
RSG00082	332.853	285.811	603.849	281.99	174.805	362.223	382.439	185.379	354.338	0.182218	-0.435569	normal	0.000326251	1.27085	up	0.00556998	0.85887	normal	Cellular Component: DNA-directed RNA polymerase IV complex (GO:0000418);; Cellular Component: DNA-directed RNA polymerase V complex (GO:0000419);; Molecular Function: DNA binding (GO:0003677);; Molecular Function: DNA-directed RNA polymerase activity (GO:0003899);; Cellular Component: DNA-directed RNA polymerase II, core complex (GO:0005665);; Biological Process: transcription, DNA-templated (GO:…	K03007|7.35269e-40|brp:103836229|DNA-directed RNA polymerases I, II, and III subunit RPABC5; K03007 DNA-directed RNA polymerases I, II, and III subunit RPABC5 (A)
RSG00085	0.613786	0.553283	0.656994	2.08997	1.06753	1.22785	1.35014	1.06117	1.74605	0.0824453	1.09922	normal	0.0322281	-1.26791	normal	0.847609	-0.158587	normal	Molecular Function: protein serine/threonine kinase activity (GO:0004674);; Molecular Function: protein tyrosine kinase activity (GO:0004713);; Molecular Function: ATP binding (GO:0005524);; Cellular Component: plasma membrane (GO:0005886);; Biological Process: protein phosphorylation (GO:0006468);; Molecular Function: carbohydrate binding (GO:0030246);; Biological Process: recognition of pollen …	--
RSG00087	3.08704	8.6122	8.9357	8.22575	6.46274	4.24749	1.88662	1.92329	2.45986	0.919498	-0.12547	normal	0.0256517	1.72572	normal	0.00105846	1.6146	up	Molecular Function: DNA binding (GO:0003677);; Cellular Component: nucleus (GO:0005634);; Biological Process: DNA methylation (GO:0006306);; Molecular Function: methyltransferase activity (GO:0008168);; Biological Process: DNA mediated transformation (GO:0009294);;	K00558|0|brp:103871899|putative DNA (cytosine-5)-methyltransferase CMT1; K00558 DNA (cytosine-5)-methyltransferase 1 [EC:2.1.1.37] (A)
RSG00088	5.33222	4.32634	5.29378	4.50366	4.96842	4.01832	3.72963	4.35388	4.21931	0.87122	-0.133149	normal	0.703045	0.23046	normal	0.875638	0.11569	normal	Biological Process: mitotic cell cycle (GO:0000278);; Molecular Function: protein binding (GO:0005515);; Cellular Component: nucleoplasm (GO:0005654);; Cellular Component: nucleolus (GO:0005730);; Cellular Component: cytoplasm (GO:0005737);; Biological Process: RNA processing (GO:0006396);; Biological Process: trichome branching (GO:0010091);; Biological Process: response to UV-B (GO:0010224);; B…	K14294|4.34646e-98|brp:103871898|partner of Y14 and mago; K14294 partner of Y14 and mago (A)
RSG00089	5.58681	4.92319	4.73834	4.47694	4.73594	4.61953	4.39492	3.42952	3.72293	0.877586	-0.111407	normal	0.629892	0.250377	normal	0.793351	0.15714	normal	Cellular Component: plasma membrane (GO:0005886);; Molecular Function: transferase activity, transferring phosphorus-containing groups (GO:0016772);;	K08869|0|brp:103871897|probable serine/threonine-protein kinase abkC; K08869 aarF domain-containing kinase (A)
RSG00090	30.9963	28.3154	20.2153	29.8022	33.9331	25.5244	57.242	45.396	45.7712	0.630902	0.213495	normal	0.00306453	-0.895451	normal	0.0422009	-0.662895	normal	Cellular Component: plasma membrane (GO:0005886);;	--
RSG00091	28.9409	30.5999	25.0818	36.1335	27.5392	36.7381	51.3917	42.8034	38.5341	0.577823	0.255638	normal	0.0736815	-0.614158	normal	0.382096	-0.341243	normal	Biological Process: response to molecule of fungal origin (GO:0002238);; Cellular Component: nucleus (GO:0005634);; Cellular Component: cytosol (GO:0005829);; Cellular Component: plasma membrane (GO:0005886);; Biological Process: response to stress (GO:0006950);; Biological Process: protein sumoylation (GO:0016925);;	--
RSG00092	0.0109766	0.0234764	0.0135909	0.0268403	0.0289186	0.125283	0.0143842	0.0230115	0.106709	--	--	--	--	--	--	--	--	--	Cellular Component: plasma membrane (GO:0005886);; Molecular Function: kinase activity (GO:0016301);; Molecular Function: carbohydrate binding (GO:0030246);;	--
RSG00093	0.0237147	0.103181	0	0.232616	0.0938024	0.0680556	0.281008	0.347332	0.18073	--	--	--	--	--	--	--	--	--	Molecular Function: protein serine/threonine kinase activity (GO:0004674);; Molecular Function: protein tyrosine kinase activity (GO:0004713);; Molecular Function: ATP binding (GO:0005524);; Cellular Component: plasma membrane (GO:0005886);; Biological Process: protein phosphorylation (GO:0006468);; Molecular Function: carbohydrate binding (GO:0030246);; Biological Process: recognition of pollen …	--
RSG00094	3.52073	2.9185	2.35337	5.504	4.29943	4.54925	5.79464	5.36077	4.90358	0.0830702	0.724378	normal	0.0314632	-0.870647	normal	0.814008	-0.129128	normal	Molecular Function: protein serine/threonine kinase activity (GO:0004674);; Molecular Function: protein tyrosine kinase activity (GO:0004713);; Molecular Function: ATP binding (GO:0005524);; Cellular Component: plasma membrane (GO:0005886);; Biological Process: protein phosphorylation (GO:0006468);; Molecular Function: carbohydrate binding (GO:0030246);; Biological Process: recognition of pollen …	--
RSG00095	2.59725	1.96859	2.38481	3.16733	3.01941	1.7708	5.0374	3.93624	3.82113	0.825895	0.224611	normal	0.148589	-0.853995	normal	0.31991	-0.612344	normal	Cellular Component: mitochondrion (GO:0005739);; Cellular Component: plastid (GO:0009536);;	--
RSG00096	9.35034	9.87145	6.08647	12.0056	9.31686	7.21791	11.2588	9.64047	10.3658	0.763469	0.187749	normal	0.518577	-0.309718	normal	0.864934	-0.106587	normal	Biological Process: MAPK cascade (GO:0000165);; Molecular Function: calmodulin binding (GO:0005516);; Cellular Component: mitochondrion (GO:0005739);; Cellular Component: Golgi apparatus (GO:0005794);; Cellular Component: plasma membrane (GO:0005886);; Biological Process: protein targeting to membrane (GO:0006612);; Cellular Component: plasmodesma (GO:0009506);; Biological Process: detection of b…	K08472|0|brp:103871889|MLO-like protein 2; K08472 mlo protein (A)
RSG00097	0.037316	0.0392821	0.0910591	0.0575836	0.0858221	0.0680636	0.0125463	0.11926	0.0525602	--	--	--	--	--	--	--	--	--	--	--
RSG00098	8.73934	8.23747	7.3907	7.18093	6.84442	4.05166	4.88741	5.49854	5.27063	0.445831	-0.407411	normal	0.193957	0.609466	normal	0.716251	0.220302	normal	Biological Process: MAPK cascade (GO:0000165);; Molecular Function: calmodulin binding (GO:0005516);; Cellular Component: mitochondrion (GO:0005739);; Cellular Component: Golgi apparatus (GO:0005794);; Cellular Component: plasma membrane (GO:0005886);; Biological Process: protein targeting to membrane (GO:0006612);; Cellular Component: plasmodesma (GO:0009506);; Biological Process: detection of b…	K08472|0|brp:103871889|MLO-like protein 2; K08472 mlo protein (A)
RSG00099	99.9715	106.593	63.0924	134.278	101.9	100.55	170.726	135.262	121.237	0.499326	0.310806	normal	0.0489037	-0.644067	normal	0.377028	-0.316559	normal	Molecular Function: sugar:proton symporter activity (GO:0005351);; Cellular Component: nucleus (GO:0005634);; Cellular Component: vacuole (GO:0005773);; Cellular Component: plasma membrane (GO:0005886);; Cellular Component: plasmodesma (GO:0009506);; Biological Process: response to nematode (GO:0009624);; Biological Process: systemic acquired resistance (GO:0009627);; Biological Process: response…	--
RSG00100	0.0185567	0.0842713	0.0469659	0.0466667	0.0988888	0.0265135	0.406193	0.0636464	0.0682778	--	--	--	--	--	--	--	--	--	--	--
RSG00101	0	0	0	0	0	0	0	0	0	--	--	--	--	--	--	--	--	--	Molecular Function: SNAP receptor activity (GO:0005484);; Cellular Component: plasma membrane (GO:0005886);; Biological Process: intracellular protein transport (GO:0006886);; Biological Process: membrane fusion (GO:0006944);; Biological Process: pollen tube growth (GO:0009860);; Biological Process: vesicle-mediated transport (GO:0016192);; Cellular Component: transport vesicle (GO:0030133);;	K08486|0|brp:103871886|syntaxin-125; K08486 syntaxin 1B/2/3 (A)
RSG00102	57.6326	56.0046	58.1937	23.6177	21.3218	38.1984	15.5032	22.0907	10.7749	0.000363113	-1.03896	down	3.3734e-09	1.84273	up	0.12567	0.827912	normal	Biological Process: mRNA splicing, via spliceosome (GO:0000398);; Cellular Component: nucleus (GO:0005634);; Biological Process: double-strand break repair (GO:0006302);; Biological Process: mitotic recombination (GO:0006312);; Biological Process: sister chromatid cohesion (GO:0007062);; Biological Process: synapsis (GO:0007129);; Biological Process: reciprocal meiotic recombination (GO:0007131);…	K14851|1.03581e-61|brp:103871885|ribosomal RNA-processing protein 17; K14851 ribosomal RNA-processing protein 17 (A)
RSG00103	0.0811661	0	0	0	0	0.113951	0	0	0	--	--	--	--	--	--	--	--	--	--	--
RSG00104	103.736	86.845	93.1936	109.905	73.7821	81.2163	29.1871	15.8062	22.0865	0.821552	-0.106686	normal	1.59797e-13	2.08941	up	4.1214e-09	1.99518	up	Biological Process: response to oxidative stress (GO:0006979);; Biological Process: response to cold (GO:0009409);; Biological Process: response to water deprivation (GO:0009414);; Biological Process: response to abscisic acid (GO:0009737);;	--
RSG00105	2.91557	3.07812	3.09236	2.55571	3.33706	3.55823	1.15165	1.27906	1.4942	0.948666	0.0673592	normal	0.0284948	1.22042	normal	0.0145726	1.30708	normal	Cellular Component: mitochondrion (GO:0005739);; Molecular Function: transferase activity, transferring glycosyl groups (GO:0016757);;	--
RSG00106	0.277364	0.802939	0.276049	0.263684	0.564718	0.130565	0.866553	0.60743	0.334039	0.821552	-0.483942	normal	0.696726	-0.46407	normal	0.424411	-0.921542	normal	Biological Process: cell morphogenesis (GO:0000902);; Molecular Function: receptor signaling protein serine/threonine kinase activity (GO:0004702);; Molecular Function: protein tyrosine kinase activity (GO:0004713);; Molecular Function: ATP binding (GO:0005524);; Cellular Component: plasma membrane (GO:0005886);; Biological Process: protein phosphorylation (GO:0006468);; Cellular Component: plasm…	--
RSG00107	0.442879	0.453115	0.242621	0.227673	0.6527	0.267368	1.15148	0.402358	0	--	--	--	--	--	--	--	--	--	Cellular Component: nucleus (GO:0005634);;	--
RSG00108	6.16062	7.30993	5.83168	5.87179	6.01784	3.01758	11.7342	6.90277	7.46379	0.694183	-0.377641	normal	0.454181	-0.493197	normal	0.179311	-0.854331	normal	Cellular Component: nucleus (GO:0005634);;	--
RSG00109	1.45028	2.45538	0.72377	1.66306	3.7603	1.78564	5.42007	2.48092	2.87922	0.547429	0.684924	normal	0.0985488	-1.26081	normal	0.522683	-0.554276	normal	Molecular Function: serine-type carboxypeptidase activity (GO:0004185);; Cellular Component: extracellular region (GO:0005576);; Biological Process: proteolysis (GO:0006508);;	K16297|0|brp:103871876|serine carboxypeptidase-like 31; K16297 serine carboxypeptidase-like clade II [EC:3.4.16.-] (A)
RSG00110	0	0	0	0	0	0	0	0	0	--	--	--	--	--	--	--	--	--	--	--
RSG00111	0.585625	0.327492	0.162153	0.558996	0.406944	0.214826	1.74156	1.18511	1.33522	0.953114	0.166097	normal	0.0049844	-2.06117	down	0.0085123	-1.88123	down	Cellular Component: cytoplasm (GO:0005737);;	--
RSG00112	5.21619	4.91269	4.63804	4.51196	2.97577	3.81563	5.81342	6.62675	4.40087	0.46719	-0.370453	normal	0.6919	-0.19297	normal	0.210471	-0.544738	normal	Cellular Component: nucleus (GO:0005634);; Cellular Component: mitochondrion (GO:0005739);; Biological Process: mitotic nuclear division (GO:0007067);;	--
RSG00113	4.67906	2.60728	2.43282	6.77137	5.67756	5.91786	4.77415	4.8304	3.50306	0.0792075	0.942136	normal	0.490176	-0.446648	normal	0.363616	0.514718	normal	Cellular Component: nucleus (GO:0005634);; Biological Process: protein folding (GO:0006457);; Molecular Function: heat shock protein binding (GO:0031072);; Molecular Function: unfolded protein binding (GO:0051082);;	K09519|0|brp:103871873|uncharacterized LOC103871873; K09519 DnaJ homolog subfamily B member 13 (A)
RSG00114	0	0	0	0	0	0	0	0	0	--	--	--	--	--	--	--	--	--	Molecular Function: zinc ion binding (GO:0008270);;	--
RSG00115	0	0	0	0	0	0	0	0	0	--	--	--	--	--	--	--	--	--	--	--
RSG00116	0	0	0	0	0	0	0	0	0	--	--	--	--	--	--	--	--	--	--	--
RSG00117	0	0	0	0	0	0	0	0	0	--	--	--	--	--	--	--	--	--	Molecular Function: electron carrier activity (GO:0009055);; Cellular Component: chloroplast stroma (GO:0009570);; Biological Process: response to blue light (GO:0009637);; Biological Process: response to high light intensity (GO:0009644);; Biological Process: response to sucrose (GO:0009744);; Biological Process: photosynthetic electron transport in photosystem I (GO:0009773);; Biological Proces…	K02639|5.73487e-66|brp:103871871|ferredoxin-1, chloroplastic; K02639 ferredoxin (A)
RSG00118	238.386	178.084	399.184	128.519	146.488	136.655	259.348	232.99	273.503	0.371282	-0.322653	normal	0.287162	-0.367094	normal	0.0330688	-0.672776	normal	--	--
RSG00121	10.2833	11.9758	8.91005	10.5705	11.491	11.6936	10.928	12.8615	9.75355	0.837393	0.137724	normal	0.836553	-0.1165	normal	0.958636	0.0426016	normal	Molecular Function: protein serine/threonine kinase activity (GO:0004674);; Molecular Function: protein binding (GO:0005515);; Molecular Function: ATP binding (GO:0005524);; Cellular Component: nucleus (GO:0005634);; Cellular Component: cytosol (GO:0005829);; Biological Process: protein phosphorylation (GO:0006468);; Biological Process: ubiquitin-dependent protein catabolic process (GO:0006511);;…	K14498|0|brp:103843271|serine/threonine-protein kinase SRK2A-like; K14498 serine/threonine-protein kinase SRK2 [EC:2.7.11.1] (A)
RSG00122	14.2515	10.8411	17.2839	10.3584	7.43611	14.781	4.75552	6.65623	4.55342	0.564149	-0.366481	normal	0.000223542	1.40455	up	0.0475859	1.05847	normal	Cellular Component: mitochondrion (GO:0005739);; Biological Process: regulation of transcription, DNA-templated (GO:0006355);;	--
RSG00123	2.64562	3.05465	2.82238	2.15699	2.42565	3.20766	3.85797	4.99769	3.16441	0.855626	-0.135512	normal	0.247777	-0.521234	normal	0.152293	-0.63326	normal	Molecular Function: ATP binding (GO:0005524);; Cellular Component: nucleus (GO:0005634);; Cellular Component: plasma membrane (GO:0005886);; Molecular Function: 1-phosphatidylinositol-4-phosphate 5-kinase activity (GO:0016308);; Biological Process: phosphatidylinositol phosphorylation (GO:0046854);;	K00889|0|brp:103871866|phosphatidylinositol 4-phosphate 5-kinase 7; K00889 1-phosphatidylinositol-4-phosphate 5-kinase [EC:2.7.1.68] (A)
RSG00124	16.7351	14.0045	11.3227	25.84	28.3507	20.8891	49.7628	34.5318	38.9986	0.00764427	0.802707	normal	1.27709e-07	-1.5077	down	0.0292299	-0.687951	normal	--	K13173|1.54802e-70|brp:103871867|uncharacterized protein At1g10890; K13173 arginine and glutamate-rich protein 1 (A)
RSG00125	0	0	0	0	0	0	0	0	0	--	--	--	--	--	--	--	--	--	Cellular Component: nucleus (GO:0005634);; Molecular Function: acetylglucosaminyltransferase activity (GO:0008375);; Biological Process: response to salt stress (GO:0009651);; Cellular Component: membrane (GO:0016020);;	--
RSG00126	9.74926	9.29114	8.55532	8.22506	8.83683	7.53791	8.72224	7.04167	7.87416	0.762077	-0.156208	normal	0.673766	0.17873	normal	0.945565	0.0404495	normal	Molecular Function: phospholipid binding (GO:0005543);; Cellular Component: Golgi apparatus (GO:0005794);; Biological Process: methylation-dependent chromatin silencing (GO:0006346);; Biological Process: cell-cell signaling (GO:0007267);; Molecular Function: ARF GTPase activator activity (GO:0008060);; Molecular Function: zinc ion binding (GO:0008270);; Biological Process: virus induced gene sile…	K12489|0|brp:103871864|ADP-ribosylation factor GTPase-activating protein AGD4; K12489 Arf-GAP with coiled-coil, ANK repeat and PH domain-containing protein (A)
RSG00127	15.8706	15.1709	17.8782	10.1755	13.0816	8.4601	9.72785	8.85889	10.7993	0.0701291	-0.630134	normal	0.0389131	0.717528	normal	0.841108	0.105821	normal	Molecular Function: protein serine/threonine kinase activity (GO:0004674);; Molecular Function: ATP binding (GO:0005524);; Cellular Component: plasma membrane (GO:0005886);; Biological Process: protein phosphorylation (GO:0006468);; Biological Process: transmembrane receptor protein tyrosine kinase signaling pathway (GO:0007169);; Cellular Component: integral component of membrane (GO:0016021);;	--
RSG00128	71.2478	54.9761	84.4885	38.6	34.976	37.6998	29.7566	35.2932	25.6337	0.0201144	-0.672897	normal	0.000251739	1.0365	up	0.276091	0.384332	normal	Biological Process: mitotic G2 phase (GO:0000085);; Biological Process: formation of translation preinitiation complex (GO:0001731);; Molecular Function: translation initiation factor activity (GO:0003743);; Cellular Component: cytosol (GO:0005829);; Cellular Component: eukaryotic translation initiation factor 3 complex (GO:0005852);; Biological Process: regulation of translational initiation (GO…	K03247|0|brp:103843266|eukaryotic translation initiation factor 3 subunit H-like; K03247 translation initiation factor 3 subunit H (A)
RSG00130	3.91202	3.61412	4.8174	6.00632	4.46676	3.78543	8.45735	6.44476	7.96403	0.661095	0.269469	normal	0.0179075	-0.948819	normal	0.108309	-0.665711	normal	Cellular Component: nucleus (GO:0005634);;	--
RSG00132	0.521916	0.343309	0.395068	0.260219	0.710691	0.290838	0.267395	0.43268	0.562944	--	--	--	--	--	--	--	--	--	--	--
RSG00133	0	0	0	0	0	0	0	0	0	--	--	--	--	--	--	--	--	--	Cellular Component: nucleus (GO:0005634);; Biological Process: DNA replication initiation (GO:0006270);; Biological Process: regulation of DNA replication (GO:0006275);; Biological Process: cell proliferation (GO:0008283);; Cellular Component: plasmodesma (GO:0009506);; Biological Process: regulation of G2/M transition of mitotic cell cycle (GO:0010389);; Biological Process: histone phosphorylati…	--
RSG00134	0	0	0	0	0	0	0	0	0	--	--	--	--	--	--	--	--	--	Biological Process: pollen tube growth (GO:0009860);; Molecular Function: pectinesterase activity (GO:0030599);; Biological Process: negative regulation of catalytic activity (GO:0043086);; Molecular Function: pectinesterase inhibitor activity (GO:0046910);;	--
RSG00135	30.2175	33.0765	31.2459	28.8788	29.3436	27.2263	21.4655	24.3622	19.7218	0.771569	-0.131626	normal	0.0844763	0.526932	normal	0.223025	0.415542	normal	Cellular Component: cytosol (GO:0005829);; Biological Process: protein glycosylation (GO:0006486);; Biological Process: intracellular protein transport (GO:0006886);; Biological Process: vesicle-mediated transport (GO:0016192);; Cellular Component: clathrin vesicle coat (GO:0030125);; Cellular Component: clathrin adaptor complex (GO:0030131);;	K12393|0|brp:103871855|AP-1 complex subunit mu-2-like; K12393 AP-1 complex subunit mu (A)
RSG00136	19.5117	13.8405	16.2385	26.342	17.0476	22.8545	24.059	35.0883	23.4859	0.298106	0.442616	normal	0.0408765	-0.74761	normal	0.49952	-0.285731	normal	Molecular Function: magnesium ion binding (GO:0000287);; Molecular Function: ribose phosphate diphosphokinase activity (GO:0004749);; Biological Process: heme biosynthetic process (GO:0006783);; Biological Process: nucleoside metabolic process (GO:0009116);; Biological Process: nucleotide biosynthetic process (GO:0009165);; Cellular Component: chloroplast (GO:0009507);;	--
RSG00137	2.67531	8.97217	2.15187	5.83284	7.17477	4.34285	1.34004	2.89837	3.46476	--	--	--	--	--	--	--	--	--	Molecular Function: protein binding (GO:0005515);; Cellular Component: nucleus (GO:0005634);;	--
RSG00138	0	0	0	0	0	0	0	0	0.0173528	--	--	--	--	--	--	--	--	--	Molecular Function: ATP binding (GO:0005524);; Cellular Component: mitochondrion (GO:0005739);; Cellular Component: plasma membrane (GO:0005886);; Biological Process: ATP catabolic process (GO:0006200);; Cellular Component: chloroplast (GO:0009507);; Biological Process: vernalization response (GO:0010048);; Biological Process: auxin efflux (GO:0010315);; Molecular Function: auxin efflux transmemb…	K05658|0|brp:103871850|ABC transporter B family member 10; K05658 ATP-binding cassette, subfamily B (MDR/TAP), member 1 [EC:3.6.3.44] (A)
RSG00139	13.0097	10.6053	12.9919	14.1821	13.1577	13.3208	10.1165	10.984	12.393	0.769494	0.167946	normal	0.767545	0.148733	normal	0.457018	0.334432	normal	--	--
RSG00140	2.48716	2.32538	7.10244	9.31506	7.24762	3.73503	2.05441	1.26228	1.91415	0.645824	0.785666	normal	--	--	--	--	--	--	Cellular Component: mitochondrion (GO:0005739);;	--
RSG00141	5.20696	3.56619	6.08948	2.82203	3.14842	5.28418	5.33254	6.472	5.24469	0.539557	-0.440268	normal	0.60944	-0.310981	normal	0.1895	-0.730061	normal	Cellular Component: cytoplasm (GO:0005737);; Molecular Function: zinc ion binding (GO:0008270);;	--
RSG00142	11.7829	11.1369	15.0449	4.00793	7.23381	6.57767	0.34891	0.553965	1.84083	0.00226115	-1.06932	down	2.40648e-19	3.8127	up	1.39369e-06	2.75569	up	Molecular Function: polygalacturonase activity (GO:0004650);; Cellular Component: extracellular region (GO:0005576);; Biological Process: carbohydrate metabolic process (GO:0005975);;	--
RSG00143	0	0	0	0	0	0	0	0	0	--	--	--	--	--	--	--	--	--	Molecular Function: protein serine/threonine kinase activity (GO:0004674);; Molecular Function: protein tyrosine kinase activity (GO:0004713);; Molecular Function: ATP binding (GO:0005524);; Cellular Component: plasma membrane (GO:0005886);; Biological Process: protein phosphorylation (GO:0006468);; Biological Process: regulation of unidimensional cell growth (GO:0051510);;	--
RSG00144	3.81884	3.89408	4.56428	7.14009	6.22026	6.33548	5.76293	4.53101	4.96534	0.110868	0.695115	normal	0.548123	-0.310979	normal	0.390394	0.400402	normal	Molecular Function: DNA binding (GO:0003677);; Molecular Function: sequence-specific DNA binding transcription factor activity (GO:0003700);; Cellular Component: nucleus (GO:0005634);; Biological Process: regulation of transcription, DNA-templated (GO:0006355);;	--
RSG00145	51.378	52.0904	63.0812	55.0879	55.5504	56.4036	46.4295	52.5751	49.7028	0.926412	0.0547711	normal	0.67183	0.164533	normal	0.550831	0.238797	normal	Cellular Component: cytosol (GO:0005829);; Cellular Component: plasma membrane (GO:0005886);;	K07466|3.39082e-76|brp:103871841|uncharacterized protein At4g28440; K07466 replication factor A1 (A)
RSG00146	0	0	0	0	0	0	0	0	0	--	--	--	--	--	--	--	--	--	Molecular Function: sequence-specific DNA binding transcription factor activity (GO:0003700);; Cellular Component: nucleus (GO:0005634);; Cellular Component: cytoplasm (GO:0005737);; Biological Process: regulation of transcription, DNA-templated (GO:0006355);; Biological Process: amino acid transport (GO:0006865);; Molecular Function: protein dimerization activity (GO:0046983);;	--
RSG00147	58.5378	51.7446	52.6372	50.4606	39.6271	55.1336	37.5703	39.1683	31.0135	0.708297	-0.16153	normal	0.0382496	0.628143	normal	0.140588	0.48541	normal	Molecular Function: nucleotide binding (GO:0000166);; Cellular Component: nucleus (GO:0005634);; Cellular Component: Cul4-RING E3 ubiquitin ligase complex (GO:0080008);;	K12816|0|brp:103871838|pre-mRNA-processing factor 17; K12816 pre-mRNA-processing factor 17 (A)
RSG00148	0	0	0	0	0	0	0	0	0	--	--	--	--	--	--	--	--	--	Molecular Function: nucleic acid binding (GO:0003676);; Molecular Function: zinc ion binding (GO:0008270);; Biological Process: DNA integration (GO:0015074);; Cellular Component: intracellular membrane-bounded organelle (GO:0043231);; Cellular Component: cytoplasmic part (GO:0044444);;	--
RSG00149	0	0.135894	0.109535	0	0.398473	0	0	0	0	--	--	--	--	--	--	--	--	--	--	K14487|0|brp:103871836|4-substituted benzoates-glutamate ligase GH3.12-like; K14487 auxin responsive GH3 gene family (A)
RSG00150	0	0	0	0.0497773	0	0	0	0.210898	0.655386	--	--	--	--	--	--	--	--	--	--	K14487|0|brp:103871836|4-substituted benzoates-glutamate ligase GH3.12-like; K14487 auxin responsive GH3 gene family (A)
RSG00151	11.1827	10.8542	11.2406	13.0086	12.4513	13.2705	11.867	11.5291	12.7265	0.641535	0.224268	normal	0.765797	-0.135573	normal	0.833322	0.10583	normal	Cellular Component: nucleus (GO:0005634);; Biological Process: proteolysis (GO:0006508);; Biological Process: response to salt stress (GO:0009651);; Biological Process: embryo development ending in seed dormancy (GO:0009793);; Biological Process: vegetative to reproductive phase transition of meristem (GO:0010228);; Biological Process: glucuronoxylan metabolic process (GO:0010413);; Biological Pr…	K16287|0|brp:103871833|ubiquitin-like-specific protease 1C; K16287 ubiquitin-like-specific protease 1C/D [EC:3.4.22.68] (A)
RSG00152	7.23676	13.3962	9.16495	7.15802	9.2184	6.83019	5.44955	3.23609	9.76265	0.517729	-0.389327	normal	0.293767	0.695931	normal	0.652327	0.318201	normal	Cellular Component: ubiquitin ligase complex (GO:0000151);; Molecular Function: ubiquitin-protein transferase activity (GO:0004842);; Cellular Component: nucleus (GO:0005634);; Molecular Function: zinc ion binding (GO:0008270);; Biological Process: regulation of seed germination (GO:0010029);; Biological Process: protein ubiquitination (GO:0016567);;	--
RSG00153	138.959	112.34	199.456	32.6375	13.6222	18.4123	18.9309	27.3093	26.6845	1.4183e-07	-2.16473	down	9.1637e-09	2.22902	up	0.886345	0.0789916	normal	Biological Process: response to light intensity (GO:0009642);; Biological Process: regulation of gene expression (GO:0010468);; Cellular Component: plastid nucleoid (GO:0042646);;	--
RSG00155	197.859	163.514	177.824	238.718	240.355	228.07	201.654	191.363	183.009	0.207717	0.420591	normal	0.86072	-0.0722848	normal	0.296802	0.366796	normal	Molecular Function: structural molecule activity (GO:0005198);; Cellular Component: chloroplast stroma (GO:0009570);; Biological Process: iron-sulfur cluster assembly (GO:0016226);; Biological Process: hydrogen peroxide catabolic process (GO:0042744);; Molecular Function: iron-sulfur cluster binding (GO:0051536);;	K13628|1.68332e-124|brp:103871827|iron-sulfur assembly protein IscA, chloroplastic-like; K13628 iron-sulfur cluster assembly protein (A)
RSG00156	0	0	0	0	0.850515	0	0	0.767546	0	--	--	--	--	--	--	--	--	--	Cellular Component: extracellular region (GO:0005576);;	--
RSG00157	18.1764	17.5929	17.7487	11.2556	15.1715	7.38344	8.65322	4.55804	9.20111	0.236179	-0.603637	normal	0.0091218	1.23603	up	0.253723	0.647438	normal	--	--
RSG00158	20.401	13.9949	16.5714	8.75329	8.19243	5.51906	4.65178	5.35013	6.70266	0.00881445	-1.18779	down	0.000587114	1.63598	up	0.50327	0.46427	normal	Molecular Function: phosphorelay response regulator activity (GO:0000156);; Biological Process: phosphorelay signal transduction system (GO:0000160);; Molecular Function: protein serine/threonine kinase activity (GO:0004674);; Molecular Function: protein binding (GO:0005515);; Cellular Component: nucleus (GO:0005634);; Cellular Component: cytoplasm (GO:0005737);; Biological Process: regulation of…	K14492|3.92896e-118|brp:103871817|two-component response regulator ARR4-like; K14492 two-component response regulator ARR-A family (A)
RSG00159	6.56384	6.49111	5.28851	2.60374	2.9049	4.46166	3.05199	4.78368	3.0623	0.0101394	-0.874668	normal	0.0386943	0.746417	normal	0.864947	-0.104233	normal	Cellular Component: nucleus (GO:0005634);; Biological Process: regulation of transcription, DNA-templated (GO:0006355);;	K11644|0|brp:103871816|paired amphipathic helix protein Sin3-like 6; K11644 paired amphipathic helix protein Sin3a (A)
RSG00160	19.0479	19.6281	19.4498	29.5552	30.1007	24.7371	41.3373	35.6449	38.4295	0.169105	0.527125	normal	0.00278315	-0.996804	normal	0.226577	-0.451916	normal	Molecular Function: protein serine/threonine phosphatase activity (GO:0004722);; Cellular Component: nucleus (GO:0005634);; Cellular Component: cytosol (GO:0005829);; Cellular Component: plasma membrane (GO:0005886);; Biological Process: glucose catabolic process (GO:0006007);; Biological Process: protein dephosphorylation (GO:0006470);; Biological Process: N-terminal protein myristoylation (GO:0…	K04382|0|brp:103871815|serine/threonine-protein phosphatase PP2A-2 catalytic subunit; K04382 serine/threonine-protein phosphatase 2A catalytic subunit [EC:3.1.3.16] (A)
RSG00161	9.46403	9.62076	10.9824	12.9331	10.0628	7.88573	22.3737	17.5726	18.5166	0.971531	0.0392025	normal	0.0185073	-0.92697	normal	0.0266348	-0.872371	normal	Molecular Function: DNA binding (GO:0003677);; Molecular Function: sequence-specific DNA binding transcription factor activity (GO:0003700);; Cellular Component: nucleus (GO:0005634);; Biological Process: regulation of transcription, DNA-templated (GO:0006355);; Biological Process: fatty acid catabolic process (GO:0009062);; Biological Process: jasmonic acid metabolic process (GO:0009694);; Biolo…	--
RSG00162	0.0629137	0	0.0775859	0.153395	0.0820684	0	0	0.0665282	0.0672741	--	--	--	--	--	--	--	--	--	--	--
RSG00163	10.8603	14.1564	6.59049	9.70737	14.7957	11.5557	4.25701	4.72091	5.76386	0.701983	0.247571	normal	0.0380032	1.05696	normal	0.000502185	1.32451	up	Cellular Component: nucleus (GO:0005634);; Biological Process: amino acid transport (GO:0006865);;	--
RSG00164	24.9489	22.5302	24.207	23.335	22.3534	25.1344	22.9141	23.4349	18.9225	1	-0.00243131	normal	0.743789	0.123221	normal	0.738742	0.140685	normal	Molecular Function: transporter activity (GO:0005215);; Molecular Function: protein binding (GO:0005515);; Cellular Component: nuclear envelope (GO:0005635);;	K14297|0|brp:103871810|uncharacterized protein DDB_G0274915-like; K14297 nuclear pore complex protein Nup98-Nup96 (A)
RSG00165	15.5358	14.8045	14.555	18.853	17.4563	13.3181	13.4457	7.68348	9.80634	0.838987	0.139632	normal	0.351173	0.468491	normal	0.184935	0.62387	normal	Cellular Component: extracellular region (GO:0005576);; Molecular Function: polysaccharide binding (GO:0030247);;	--
RSG00166	108.159	107.841	191.688	62.7276	65.0491	56.4687	71.0579	109.06	49.5198	0.0380107	-1.11597	normal	0.13483	0.831748	normal	0.642785	-0.258932	normal	Molecular Function: glutathione transferase activity (GO:0004364);; Biological Process: pentose-phosphate shunt (GO:0006098);; Biological Process: glutathione metabolic process (GO:0006749);; Biological Process: toxin catabolic process (GO:0009407);; Cellular Component: chloroplast (GO:0009507);; Biological Process: response to salt stress (GO:0009651);; Biological Process: de-etiolation (GO:0009…	K00799|6.31103e-145|brp:103871807|glutathione S-transferase U17; K00799 glutathione S-transferase [EC:2.5.1.18] (A)
RSG00167	8.05147e-19	1.74047	2.51302	2.76473	3.3787e-39	1.32815	2.76975	2.54149	5.86773e-05	1	-0.0293311	normal	0.872275	-0.313085	normal	0.887143	-0.32845	normal	Cellular Component: mitochondrion (GO:0005739);;	--
RSG00168	0	0	0	0	0	0	0	0	0	--	--	--	--	--	--	--	--	--	--	--
RSG00169	0	0	0	0	0	0	0	0	0	--	--	--	--	--	--	--	--	--	Molecular Function: metal ion binding (GO:0046872);;	--
RSG00170	2.07879	0.376071	0.103104	1.85634	0.000222062	1.84241	0.00249151	0.619683	0.000121928	0.854182	0.540089	normal	0.481825	2.03011	normal	0.204594	2.60666	normal	Biological Process: RNA methylation (GO:0001510);; Molecular Function: GTP binding (GO:0005525);; Cellular Component: nucleolus (GO:0005730);; Molecular Function: ferrous iron transmembrane transporter activity (GO:0015093);; Biological Process: ferrous iron transport (GO:0015684);; Cellular Component: integral component of membrane (GO:0016021);; Biological Process: ribosome biogenesis (GO:00422…	K06943|0|aly:ARALYDRAFT_888292|hypothetical protein; K06943 nucleolar GTP-binding protein (A)
RSG00171	25.7528	27.3782	25.3545	20.7266	22.2272	19.3082	26.3505	26.7278	24.6079	0.367776	-0.321166	normal	0.976286	0.0159458	normal	0.430685	-0.285712	normal	Molecular Function: GTPase activity (GO:0003924);; Molecular Function: GTP binding (GO:0005525);; Molecular Function: phospholipid binding (GO:0005543);; Cellular Component: vacuolar membrane (GO:0005774);; Cellular Component: Golgi apparatus (GO:0005794);; Cellular Component: cytosol (GO:0005829);; Cellular Component: plasma membrane (GO:0005886);; Biological Process: GTP catabolic process (GO:0…	K01528|0|brp:103871801|dynamin-2A-like; K01528 dynamin GTPase [EC:3.6.5.5] (A)
RSG00172	0	0	0	0	0	0	0	0	0	--	--	--	--	--	--	--	--	--	--	--
RSG00173	5.62752	4.46152	6.81725	3.49487	3.23489	5.8935	3.78839	5.13445	4.33368	0.556275	-0.406727	normal	0.604345	0.324029	normal	0.948537	-0.0624777	normal	Cellular Component: mitochondrion (GO:0005739);; Molecular Function: acetylglucosaminyltransferase activity (GO:0008375);; Cellular Component: membrane (GO:0016020);;	--
RSG00174	5.14813	5.73267	5.79663	3.4921	3.77959	4.11503	3.53686	4.7162	2.92638	0.234827	-0.5318	normal	0.167191	0.592632	normal	0.908004	0.084125	normal	Biological Process: mRNA splicing, via spliceosome (GO:0000398);; Molecular Function: protein binding (GO:0005515);; Cellular Component: nucleus (GO:0005634);; Cellular Component: mitochondrion (GO:0005739);; Biological Process: response to abscisic acid (GO:0009737);; Biological Process: response to salicylic acid (GO:0009751);; Biological Process: cotyledon development (GO:0048825);; Biological…	--
RSG00175	5.82447	6.0412	7.2922	6.65396	9.39748	7.69195	9.81306	8.03636	8.94715	0.506676	0.315136	normal	0.208101	-0.496494	normal	0.739956	-0.161672	normal	Cellular Component: nucleus (GO:0005634);; Molecular Function: zinc ion binding (GO:0008270);; Biological Process: response to red or far red light (GO:0009639);;	--
RSG00176	17.481	18.2455	20.2145	18.1127	19.9582	19.4232	19.9373	15.8499	18.7862	0.942531	0.0442606	normal	0.906423	0.0526187	normal	0.799376	0.114553	normal	Biological Process: polysaccharide biosynthetic process (GO:0000271);; Molecular Function: acetyl-CoA carboxylase activity (GO:0003989);; Molecular Function: biotin carboxylase activity (GO:0004075);; Molecular Function: ATP binding (GO:0005524);; Cellular Component: cytosol (GO:0005829);; Biological Process: acetyl-CoA metabolic process (GO:0006084);; Biological Process: fatty acid biosynthetic …	K01961|0|brp:103871796|biotin carboxylase, chloroplastic; K01961 acetyl-CoA carboxylase, biotin carboxylase subunit [EC:6.4.1.2 6.3.4.14] (A)
RSG00177	0.276053	0.151324	0.521516	0	0.370907	0.194836	0	0	0.428972	--	--	--	--	--	--	--	--	--	--	--
RSG00178	0	0	0	0	0	0	0.512097	0.138989	0.4318	--	--	--	--	--	--	--	--	--	Biological Process: MAPK cascade (GO:0000165);; Biological Process: response to superoxide (GO:0000303);; Biological Process: cell morphogenesis (GO:0000902);; Molecular Function: MAP kinase activity (GO:0004707);; Molecular Function: ATP binding (GO:0005524);; Cellular Component: nucleus (GO:0005634);; Biological Process: regulation of transcription, DNA-templated (GO:0006355);; Biological Proce…	K04371|3.3291e-157|brp:103871793|mitogen-activated protein kinase 1; K04371 mitogen-activated protein kinase 1/3 [EC:2.7.11.24] (A)
RSG00179	27.6494	29.5081	22.1726	23.103	19.594	10.6211	17.6375	12.1371	27.9519	0.290367	-0.537189	normal	0.405989	0.413503	normal	0.919847	-0.113748	normal	Molecular Function: sequence-specific DNA binding transcription factor activity (GO:0003700);; Cellular Component: cytoplasm (GO:0005737);; Cellular Component: plasma membrane (GO:0005886);; Biological Process: regulation of transcription, DNA-templated (GO:0006355);; Biological Process: membrane fusion (GO:0006944);; Molecular Function: zinc ion binding (GO:0008270);; Molecular Function: actin f…	--
RSG00180	0	0	0	0	0	0	0	0	0	--	--	--	--	--	--	--	--	--	--	--
RSG00181	0	0.291352	0.0672489	0	0	0	0.0702971	0.0568117	0.582842	--	--	--	--	--	--	--	--	--	Molecular Function: hydrolase activity, acting on ester bonds (GO:0016788);;	--
RSG00182	0	0	0	0.191375	0	0	0	0	0.254064	--	--	--	--	--	--	--	--	--	--	--
RSG00183	0	0	0	0	0	0	0	0	0	--	--	--	--	--	--	--	--	--	--	--
RSG00184	3.37203e-05	0.000606491	0.0823913	0.149661	0.846595	0.00049132	0.847377	0.0227549	0.000293787	--	--	--	--	--	--	0.964935	0.232224	normal	Molecular Function: sequence-specific DNA binding transcription factor activity (GO:0003700);; Cellular Component: nucleus (GO:0005634);; Biological Process: regulation of transcription, DNA-templated (GO:0006355);; Biological Process: autophagy (GO:0006914);; Molecular Function: zinc ion binding (GO:0008270);; Biological Process: response to symbiotic fungus (GO:0009610);; Biological Process: re…	K12236|0|brp:103871791|NF-X1-type zinc finger protein NFXL1-like; K12236 transcriptional repressor NF-X1 [EC:6.3.2.-] (A)
RSG00185	6.54609	8.81275	12.7558	12.6636	13.3361	12.5791	0.188623	0.619094	0.939271	0.497231	0.48587	normal	4.87062e-07	4.12741	up	8.71706e-11	4.6286	up	Cellular Component: nucleus (GO:0005634);; Molecular Function: carbohydrate binding (GO:0030246);; Molecular Function: metal ion binding (GO:0046872);;	--
RSG00186	2.46576e-05	0.000135646	2.23998e-06	1.6162e-07	0.188554	1.83127e-07	8.32476e-06	8.43725e-06	0.153042	--	--	--	--	--	--	--	--	--	Cellular Component: mitochondrion (GO:0005739);;	--
RSG00187	18.3397	28.3815	9.94642	32.274	26.4827	27.2876	32.0025	79.7185	18.1577	0.189693	0.677148	normal	0.325277	-1.21188	normal	0.65921	-0.505897	normal	Cellular Component: mitochondrion (GO:0005739);; Cellular Component: plasma membrane (GO:0005886);;	--
RSG00188	28.6276	21.9964	34.882	27.24	29.3113	28.0288	25.2176	15.8154	21.9108	0.631432	-0.203955	normal	0.189538	0.507668	normal	0.371941	0.318485	normal	Molecular Function: calcium-transporting ATPase activity (GO:0005388);; Molecular Function: calmodulin binding (GO:0005516);; Molecular Function: ATP binding (GO:0005524);; Cellular Component: nucleus (GO:0005634);; Cellular Component: endosome (GO:0005768);; Cellular Component: Golgi apparatus (GO:0005794);; Cellular Component: trans-Golgi network (GO:0005802);; Biological Process: ATP biosynthe…	K05853|0|brp:103871788|calcium-transporting ATPase 3, endoplasmic reticulum-type; K05853 Ca2 transporting ATPase, sarcoplasmic/endoplasmic reticulum [EC:3.6.3.8] (A)
RSG00189	4.46514	6.13025	5.8786	4.39445	5.17376	4.90633	4.97934	3.19917	4.60343	0.915065	-0.0910578	normal	0.707137	0.217547	normal	0.827045	0.143549	normal	Molecular Function: DNA binding (GO:0003677);; Molecular Function: sequence-specific DNA binding transcription factor activity (GO:0003700);; Cellular Component: nucleus (GO:0005634);; Biological Process: regulation of transcription, DNA-templated (GO:0006355);; Molecular Function: protein dimerization activity (GO:0046983);;	--
RSG00190	5.75679	10.6084	5.08811	9.45938	11.9078	11.3397	17.2618	10.381	8.38882	0.14684	0.659883	normal	0.234245	-0.732566	normal	0.941338	-0.0524802	normal	Cellular Component: mitochondrion (GO:0005739);; Biological Process: branched-chain amino acid metabolic process (GO:0009081);; Biological Process: toxin catabolic process (GO:0009407);; Cellular Component: chloroplast (GO:0009507);; Biological Process: response to sucrose (GO:0009744);; Biological Process: response to fructose (GO:0009750);; Molecular Function: L-leucine transaminase activity (G…	K00826|0|brp:103871787|branched-chain-amino-acid aminotransferase 2, chloroplastic-like; K00826 branched-chain amino acid aminotransferase [EC:2.6.1.42] (A)
RSG00191	0	0.0585391	0	0	0.288344	0	0	0	0	--	--	--	--	--	--	--	--	--	Molecular Function: protein binding (GO:0005515);; Cellular Component: mitochondrion (GO:0005739);; Biological Process: branched-chain amino acid metabolic process (GO:0009081);; Biological Process: toxin catabolic process (GO:0009407);; Molecular Function: L-leucine transaminase activity (GO:0052654);; Molecular Function: L-valine transaminase activity (GO:0052655);; Molecular Function: L-isoleu…	K00826|0|brp:103871785|branched-chain-amino-acid aminotransferase 1, mitochondrial; K00826 branched-chain amino acid aminotransferase [EC:2.6.1.42] (A)
RSG00192	4.18227	8.87366	3.70116	3.24312	5.87416	3.17402	0.911682	1.20893	3.4961	0.633169	-0.62721	normal	0.0335543	1.98926	normal	0.224587	1.38473	normal	Cellular Component: mitochondrion (GO:0005739);; Cellular Component: integral component of membrane (GO:0016021);; Biological Process: sterol biosynthetic process (GO:0016126);; Biological Process: pentacyclic triterpenoid biosynthetic process (GO:0019745);;	--
RSG00193	5.21645	7.70183	4.86272	13.2525	22.5075	12.3886	7.70818	7.42783	7.91401	0.0170636	1.41208	normal	0.506681	-0.313945	normal	0.0318125	1.11971	normal	Cellular Component: nucleus (GO:0005634);;	--
RSG00194	0.408482	0.602309	0.480153	0.559494	0.237649	0.251924	9.17176	4.44111	9.62287	--	--	--	1.31271e-07	-4.0247	down	5.55242e-08	-4.59408	down	Biological Process: amino acid transmembrane transport (GO:0003333);; Cellular Component: plasma membrane (GO:0005886);; Biological Process: response to nematode (GO:0009624);; Molecular Function: neutral amino acid transmembrane transporter activity (GO:0015175);; Biological Process: neutral amino acid transport (GO:0015804);; Cellular Component: integral component of membrane (GO:0016021);; Bio…	--
RSG00195	0.129974	0.23544	0.438853	1.99631	0.940724	1.94192	0.509241	0.959122	0.479548	0.00139412	2.84944	up	--	--	--	0.0627965	1.47717	normal	Biological Process: amino acid transmembrane transport (GO:0003333);; Cellular Component: plasma membrane (GO:0005886);; Molecular Function: amino acid transmembrane transporter activity (GO:0015171);; Cellular Component: integral component of membrane (GO:0016021);;	--
RSG00196	0.434951	0.677761	0.914858	0.0883821	0.142233	0.104158	5.64429	3.79758	7.81339	0.0676774	-2.70676	normal	2.0736e-06	-3.0978	down	6.68377e-11	-5.78885	down	Cellular Component: integral component of membrane (GO:0016021);;	--
RSG00197	7.72106	8.91299	7.66419	8.56297	9.23344	8.29124	6.74167	6.49706	6.63876	0.831856	0.120138	normal	0.546868	0.26043	normal	0.332561	0.39934	normal	--	--
RSG00198	4.83684	6.11826	5.5598	7.04446	5.45502	3.98194	4.281	2.69611	4.25688	0.995114	0.0162299	normal	0.243939	0.594932	normal	0.21424	0.624744	normal	Cellular Component: vacuole (GO:0005773);; Cellular Component: cis-Golgi network (GO:0005801);; Cellular Component: integral component of plasma membrane (GO:0005887);; Molecular Function: sucrose:proton symporter activity (GO:0008506);; Biological Process: sucrose transport (GO:0015770);; Biological Process: carbohydrate transmembrane transport (GO:0034219);;	K15378|0|brp:103871775|sucrose transport protein SUC4; K15378 solute carrier family 45, member 1/2/4 (A)
RSG00199	0	0	0	0	0	0	0	0	0	--	--	--	--	--	--	--	--	--	--	--
RSG00200	0	0	0	0	0	0	0	0	0	--	--	--	--	--	--	--	--	--	Biological Process: Group II intron splicing (GO:0000373);; Cellular Component: nucleus (GO:0005634);; Cellular Component: chloroplast (GO:0009507);; Molecular Function: metal ion binding (GO:0046872);; Biological Process: seed development (GO:0048316);; Biological Process: petal formation (GO:0048451);; Biological Process: sepal formation (GO:0048453);;	--
RSG00201	0.942076	1.83415	2.1729	0.566594	0.12153	0.530639	0.492388	0.526175	0.643255	0.16546	-2.08978	normal	0.132685	1.71234	normal	--	--	--	Cellular Component: nucleus (GO:0005634);; Biological Process: transcription, DNA-templated (GO:0006351);; Molecular Function: sequence-specific DNA binding (GO:0043565);;	--
RSG00202	0	0	0	0	0.0623365	0	0.0631059	0	0.207504	--	--	--	--	--	--	--	--	--	Molecular Function: catalytic activity (GO:0003824);; Biological Process: metabolic process (GO:0008152);;	--
RSG00203	0.865092	1.99748	0.988263	1.03392	1.61187	0.242367	0.33818	1.70039	0.185558	0.871337	-0.371964	normal	--	--	--	--	--	--	Cellular Component: nucleus (GO:0005634);; Biological Process: protein targeting to vacuole (GO:0006623);; Biological Process: vesicle-mediated transport (GO:0016192);;	--
RSG00204	5.08948	4.03506	6.30144	6.95752	5.15907	5.7117	2.52884	2.15065	3.19095	0.630353	0.268908	normal	0.0351538	0.961554	normal	0.00273487	1.24401	up	Cellular Component: extracellular region (GO:0005576);; Biological Process: carbohydrate metabolic process (GO:0005975);; Molecular Function: lyase activity (GO:0016829);; Molecular Function: carbohydrate binding (GO:0030246);;	K18195|0|brp:103871769|rhamnogalacturonate lyase B; K18195 rhamnogalacturonan endolyase [EC:4.2.2.23] (A)
RSG00205	18.8845	16.8418	24.273	15.5183	9.47099	13.2062	10.0035	11.776	11.7433	0.068136	-0.651939	normal	0.00509394	0.881193	normal	0.561877	0.244787	normal	Cellular Component: mitochondrion (GO:0005739);; Cellular Component: membrane (GO:0016020);;	--
RSG00206	1.26349	0.509448	0.3906	0.922259	0.123874	0.808661	0.454395	0.692455	0.204374	0.930148	-0.210531	normal	0.555592	0.709276	normal	0.725145	0.518067	normal	Cellular Component: extracellular region (GO:0005576);; Biological Process: carbohydrate metabolic process (GO:0005975);; Molecular Function: lyase activity (GO:0016829);; Molecular Function: carbohydrate binding (GO:0030246);;	K18195|0|brp:103871768|probable rhamnogalacturonate lyase B; K18195 rhamnogalacturonan endolyase [EC:4.2.2.23] (A)
RSG00207	0.992179	1.03197	0.416016	1.57618	1.02517	1.6161	0.698833	0.441648	0.448271	0.343263	0.834242	normal	0.551526	0.609452	normal	0.0552243	1.45844	normal	Cellular Component: extracellular region (GO:0005576);; Biological Process: carbohydrate metabolic process (GO:0005975);; Molecular Function: lyase activity (GO:0016829);; Molecular Function: carbohydrate binding (GO:0030246);;	K18195|0|brp:103871766|probable rhamnogalacturonate lyase B; K18195 rhamnogalacturonan endolyase [EC:4.2.2.23] (A)
RSG00208	10.1498	10.4085	10.339	13.375	12.9268	15.6614	10.1063	9.51961	11.5398	0.173117	0.524377	normal	0.811494	-0.118358	normal	0.289155	0.423347	normal	Molecular Function: acid phosphatase activity (GO:0003993);; Cellular Component: extracellular region (GO:0005576);; Cellular Component: vacuolar membrane (GO:0005774);; Cellular Component: endoplasmic reticulum (GO:0005783);; Biological Process: dephosphorylation (GO:0016311);;	K03103|0|brp:103871767|multiple inositol polyphosphate phosphatase 1; K03103 multiple inositol-polyphosphate phosphatase / 2,3-bisphosphoglycerate 3-phosphatase [EC:3.1.3.62 3.1.3.80] (A)
RSG00209	0.0705492	0.512657	0.0903365	0.0872224	0.187634	0	0.807356	0.221801	0.155854	--	--	--	--	--	--	--	--	--	Molecular Function: purine nucleobase transmembrane transporter activity (GO:0005345);; Biological Process: purine nucleobase transport (GO:0006863);; Biological Process: nucleobase-containing compound transport (GO:0015931);; Cellular Component: integral component of membrane (GO:0016021);;	--
RSG00210	48.8436	41.3187	64.637	34.5827	28.7784	39.6289	20.7746	22.5354	20.2659	0.12502	-0.575353	normal	7.0376e-05	1.28783	up	0.0279541	0.730813	normal	Cellular Component: extracellular region (GO:0005576);; Cellular Component: vacuole (GO:0005773);; Cellular Component: endoplasmic reticulum (GO:0005783);; Biological Process: proteolysis (GO:0006508);; Molecular Function: cysteine-type peptidase activity (GO:0008234);;	--
RSG00211	23.038	20.342	17.2777	17.3313	19.3305	17.6987	14.4322	14.4207	14.6042	0.626558	-0.212978	normal	0.158211	0.475894	normal	0.47753	0.281478	normal	Molecular Function: protein serine/threonine kinase activity (GO:0004674);; Molecular Function: protein tyrosine kinase activity (GO:0004713);; Molecular Function: ATP binding (GO:0005524);; Cellular Component: nucleus (GO:0005634);; Cellular Component: cytosol (GO:0005829);; Cellular Component: plasma membrane (GO:0005886);; Biological Process: protein phosphorylation (GO:0006468);; Biological P…	K03083|0|brp:103871763|shaggy-related protein kinase kappa; K03083 glycogen synthase kinase 3 beta [EC:2.7.11.26] (A)
RSG00212	5.60522	5.65236	7.62999	2.47681	2.28884	3.6969	3.70474	4.06354	2.62169	0.0127274	-1.17518	normal	0.0672763	0.897709	normal	0.727267	-0.255922	normal	Molecular Function: phosphoribosylamine-glycine ligase activity (GO:0004637);; Molecular Function: ATP binding (GO:0005524);; Biological Process: purine nucleotide biosynthetic process (GO:0006164);; Biological Process: purine nucleobase biosynthetic process (GO:0009113);; Cellular Component: chloroplast stroma (GO:0009570);; Molecular Function: metal ion binding (GO:0046872);;	K01945|0|brp:103871761|phosphoribosylamine--glycine ligase, chloroplastic; K01945 phosphoribosylamine--glycine ligase [EC:6.3.4.13] (A)
RSG00213	4.86313	4.6331	5.05863	5.28108	4.37079	5.57032	4.90474	5.11268	4.99663	0.907733	0.0774907	normal	0.96832	-0.0264221	normal	0.905424	0.0686539	normal	Cellular Component: mitochondrion (GO:0005739);;	--
RSG00214	76.4678	75.1808	88.0797	102.013	60.5698	108.25	94.0577	107.459	70.7101	0.676034	0.233783	normal	0.654678	-0.210699	normal	0.95466	0.041247	normal	Molecular Function: DNA-directed DNA polymerase activity (GO:0003887);; Cellular Component: nucleus (GO:0005634);; Biological Process: DNA replication (GO:0006260);;	K03505|2.72131e-73|brp:103871760|uncharacterized LOC103871760; K03505 DNA polymerase delta subunit 4 (A)
RSG00215	0.211534	0.208843	0.165944	0.415816	0.670348	0.363869	1.78167	0.132291	0.688295	--	--	--	--	--	--	0.673979	-0.825781	normal	--	--
RSG00216	0	0	0	0	0	0	0	0	0	--	--	--	--	--	--	--	--	--	--	--
RSG00217	0.266476	0.280904	0	0	0	0.0931446	0.172946	0.142135	0.146665	--	--	--	--	--	--	--	--	--	Molecular Function: carboxylic ester hydrolase activity (GO:0004091);; Cellular Component: extracellular region (GO:0005576);; Biological Process: lipid metabolic process (GO:0006629);; Biological Process: stomatal complex morphogenesis (GO:0010103);; Biological Process: mRNA modification (GO:0016556);;	--
RSG00218	6.73774	7.21859	6.97542	10.4629	7.80897	8.12752	17.4953	17.4929	14.4496	0.412687	0.356524	normal	0.000107006	-1.22757	down	0.00961269	-0.853674	normal	Cellular Component: nucleus (GO:0005634);;	--
RSG00219	550.467	351.701	715.776	486.94	544.071	528.5	624.375	620.701	817.85	1	0.00403048	normal	0.274129	-0.37441	normal	0.315032	-0.353512	normal	Biological Process: rRNA processing (GO:0006364);; Cellular Component: chloroplast thylakoid membrane (GO:0009535);; Cellular Component: photosystem I reaction center (GO:0009538);; Biological Process: plastid organization (GO:0009657);; Cellular Component: chloroplast envelope (GO:0009941);; Biological Process: photosystem II assembly (GO:0010207);; Cellular Component: plastoglobule (GO:0010287)…	K02693|2.86233e-55|brp:103854145|photosystem I reaction center subunit IV A, chloroplastic; K02693 photosystem I subunit IV (A)
RSG00220	19.9514	14.9056	34.7413	9.92439	9.71424	12.3175	4.76766	6.47567	5.16631	0.152646	-1.10713	normal	0.00628933	2.06917	up	0.199894	0.982373	normal	Molecular Function: glutathione-disulfide reductase activity (GO:0004362);; Molecular Function: electron carrier activity (GO:0009055);; Cellular Component: chloroplast (GO:0009507);; Molecular Function: protein disulfide oxidoreductase activity (GO:0015035);; Biological Process: iron-sulfur cluster assembly (GO:0016226);; Biological Process: cell redox homeostasis (GO:0045454);;	K03676|4.57692e-54|brp:103854154|glutaredoxin-C5, chloroplastic; K03676 glutaredoxin 3 (A)
RSG00221	2.82021	2.15525	2.99208	17.7978	20.5464	16.4445	3.49697	2.95087	1.52267	1.5501e-17	2.78471	up	0.981437	0.0342995	normal	1.15996e-15	2.84184	up	Molecular Function: N,N-dimethylaniline monooxygenase activity (GO:0004499);; Biological Process: brassinosteroid mediated signaling pathway (GO:0009742);; Biological Process: auxin biosynthetic process (GO:0009851);; Molecular Function: flavin adenine dinucleotide binding (GO:0050660);; Molecular Function: NADP binding (GO:0050661);; Biological Process: oxidation-reduction process (GO:0055114);;	K11816|0|brp:103854158|probable indole-3-pyruvate monooxygenase YUCCA8; K11816 indole-3-pyruvate monooxygenase [EC:1.14.13.168] (A)
RSG00222	0.0991332	0	0	0	0	0.141052	0.12976	0	0.22151	--	--	--	--	--	--	--	--	--	--	--
RSG00223	0	0	0	0	0	0	0	0	0	--	--	--	--	--	--	--	--	--	--	--
RSG00224	0.0626407	0	0	0.0764805	0	0	0	0	0	--	--	--	--	--	--	--	--	--	Biological Process: embryo sac egg cell differentiation (GO:0009560);;	--
RSG00225	10.0448	12.0322	11.2249	14.0033	14.528	12.5523	9.58331	8.63125	8.90824	0.379843	0.314066	normal	0.373583	0.296286	normal	0.0458665	0.628545	normal	Molecular Function: motor activity (GO:0003774);; Molecular Function: actin binding (GO:0003779);; Molecular Function: ATP binding (GO:0005524);; Cellular Component: peroxisome (GO:0005777);; Cellular Component: myosin complex (GO:0016459);; Molecular Function: Rab GTPase binding (GO:0017137);; Biological Process: actin filament-based movement (GO:0030048);; Molecular Function: GTP-dependent prot…	K10357|0|brp:103854176|myosin-14; K10357 myosin V (A)
RSG00226	31.7381	38.5079	34.5549	36.6569	28.6001	35.1631	13.6674	11.8678	18.2225	0.995114	0.0246806	normal	0.0572656	1.2032	normal	0.043253	1.24024	normal	Cellular Component: nucleus (GO:0005634);;	--
RSG00227	1.32225	2.02704	0.311001	0.200489	0.214704	0.233368	1.21884	0.175519	0.601331	0.128235	-2.65804	normal	0.478642	0.994654	normal	--	--	--	Cellular Component: extracellular region (GO:0005576);; Cellular Component: plasma membrane (GO:0005886);; Cellular Component: plasmodesma (GO:0009506);; Molecular Function: high-affinity secondary active ammonium transmembrane transporter activity (GO:0015398);; Biological Process: organic cation transport (GO:0015695);; Cellular Component: integral component of membrane (GO:0016021);; Biologica…	K03320|0|brp:103854213|ammonium transporter 1 member 4; K03320 ammonium transporter, Amt family (A)
RSG00228	0.166185	0	0.107442	0.100463	0	0.114151	1.96786	0.0848301	1.47191	--	--	--	0.0787935	-4.14309	normal	0.0996048	-4.12818	normal	--	--
RSG00229	40.3191	15.5941	45.9609	12.5899	24.5911	18.1621	15.8716	10.3673	30.4897	0.187828	-0.822092	normal	0.302412	0.712155	normal	0.944635	-0.0958864	normal	Molecular Function: aromatic-L-amino-acid decarboxylase activity (GO:0004058);; Molecular Function: tyrosine decarboxylase activity (GO:0004837);; Cellular Component: cytoplasm (GO:0005737);; Biological Process: cellular amino acid metabolic process (GO:0006520);; Biological Process: response to water deprivation (GO:0009414);; Biological Process: response to wounding (GO:0009611);; Molecular Fun…	K01592|3.66901e-75|brp:103854232|probable tyrosine decarboxylase 2; K01592 tyrosine decarboxylase [EC:4.1.1.25] (A)
RSG00230	47.0586	31.8672	64.6403	22.4493	26.5437	30.6408	15.2815	14.0273	18.8164	0.0843955	-0.743036	normal	0.0011316	1.20245	up	0.2496	0.475553	normal	Molecular Function: protein serine/threonine kinase activity (GO:0004674);; Molecular Function: ATP binding (GO:0005524);; Biological Process: protein phosphorylation (GO:0006468);; Cellular Component: chloroplast (GO:0009507);;	--
RSG00232	5.48555	6.91222	6.24608	8.69021	7.79679	5.65755	13.3975	8.68092	12.3306	0.598441	0.245929	normal	0.00728599	-0.868935	normal	0.0820511	-0.608975	normal	Biological Process: MAPK cascade (GO:0000165);; Biological Process: response to molecule of bacterial origin (GO:0002237);; Molecular Function: MAP kinase activity (GO:0004707);; Molecular Function: ATP binding (GO:0005524);; Cellular Component: plasma membrane (GO:0005886);; Biological Process: protein phosphorylation (GO:0006468);; Biological Process: transmembrane receptor protein tyrosine kin…	--
RSG00233	17.5137	18.2251	20.7908	29.0565	30.3651	23.5233	29.9036	29.1944	27.9699	0.119765	0.576908	normal	0.0987928	-0.606109	normal	0.994463	-0.0111682	normal	Molecular Function: sequence-specific DNA binding transcription factor activity (GO:0003700);; Cellular Component: nucleus (GO:0005634);; Biological Process: regulation of transcription, DNA-templated (GO:0006355);; Cellular Component: plasmodesma (GO:0009506);; Biological Process: auxin-activated signaling pathway (GO:0009734);; Biological Process: response to cyclopentenone (GO:0010583);; Molec…	K14484|1.07754e-137|brp:103854273|auxin-responsive protein IAA11; K14484 auxin-responsive protein IAA (A)
RSG00234	5.93722	6.85069	9.51771	9.2824	9.60218	5.89863	11.9723	12.835	11.103	0.600039	0.278232	normal	0.041089	-0.774287	normal	0.238542	-0.479081	normal	Biological Process: maltose metabolic process (GO:0000023);; Molecular Function: DNA binding (GO:0003677);; Molecular Function: sequence-specific DNA binding transcription factor activity (GO:0003700);; Molecular Function: motor activity (GO:0003774);; Molecular Function: enzyme inhibitor activity (GO:0004857);; Molecular Function: ATP binding (GO:0005524);; Cellular Component: nucleus (GO:000563…	K05663|0|brp:103854311|ABC transporter B family member 23, mitochondrial; K05663 mitochondrial ABC transporter ATM (A)
RSG00236	19.6878	17.748	15.4476	15.9049	15.8486	14.2017	13.6807	14.7201	15.7532	0.737993	-0.178445	normal	0.585288	0.236904	normal	0.893258	0.0764184	normal	Biological Process: photoreactive repair (GO:0000719);; Molecular Function: DNA binding (GO:0003677);; Molecular Function: chromatin binding (GO:0003682);; Molecular Function: sequence-specific DNA binding transcription factor activity (GO:0003700);; Molecular Function: DNA photolyase activity (GO:0003913);; Cellular Component: nucleus (GO:0005634);; Biological Process: regulation of transcriptio…	--
RSG00237	7.3111	7.65567	7.64417	7.87808	8.26178	7.64204	9.99065	9.82911	8.69457	0.84818	0.109365	normal	0.379714	-0.339287	normal	0.633249	-0.210409	normal	Molecular Function: calmodulin binding (GO:0005516);; Cellular Component: plasma membrane (GO:0005886);;	--
RSG00238	14.5504	7.4257	7.85523	13.0161	11.3007	9.86843	6.81605	7.22646	5.49305	0.817841	0.174933	normal	0.326752	0.569751	normal	0.112649	0.764064	normal	Biological Process: response to molecule of bacterial origin (GO:0002237);; Molecular Function: protein binding (GO:0005515);; Cellular Component: nucleus (GO:0005634);; Biological Process: signal transduction (GO:0007165);; Biological Process: response to light stimulus (GO:0009416);; Biological Process: pollen tube growth (GO:0009860);; Biological Process: stomatal complex morphogenesis (GO:001…	--
RSG00239	19.5695	20.4503	23.6308	23.6002	25.3942	22.4048	19.0797	18.7235	22.725	0.655689	0.197802	normal	0.912509	0.0508887	normal	0.494169	0.266459	normal	Molecular Function: protein serine/threonine kinase activity (GO:0004674);; Molecular Function: ATP binding (GO:0005524);; Cellular Component: plasmodesma (GO:0009506);; Biological Process: response to sucrose (GO:0009744);; Biological Process: response to glucose (GO:0009749);; Biological Process: response to fructose (GO:0009750);; Biological Process: D-xylose metabolic process (GO:0042732);; B…	--
RSG00240	1.27822	9.14814	2.51662	0.323812	1.32045	2.36815	0.172978	0.779131	0.142571	0.493474	-1.6814	normal	0.113516	3.70827	normal	0.227077	2.06846	normal	Molecular Function: DNA binding (GO:0003677);; Molecular Function: sequence-specific DNA binding transcription factor activity (GO:0003700);; Cellular Component: nucleus (GO:0005634);; Biological Process: regulation of transcription, DNA-templated (GO:0006355);; Biological Process: multicellular organismal development (GO:0007275);;	--
RSG00241	0.280761	0.370384	0.480635	0.666003	0.516531	0.441564	0.150788	0.28761	0.340299	--	--	--	--	--	--	--	--	--	Biological Process: photomorphogenesis (GO:0009640);; Biological Process: seed germination (GO:0009845);; Biological Process: regulation of flower development (GO:0009909);; Biological Process: meristem structural organization (GO:0009933);; Biological Process: seed dormancy process (GO:0010162);; Biological Process: sugar mediated signaling pathway (GO:0010182);; Biological Process: vegetative t…	--
RSG00242	101.431	104.011	109.179	62.1145	30.6892	89.5798	36.3907	60.1661	25.4423	0.0740934	-0.755684	normal	7.07175e-07	1.3792	up	0.448921	0.646129	normal	Cellular Component: cell wall (GO:0005618);; Cellular Component: mitochondrial respiratory chain complex I (GO:0005747);; Cellular Component: vacuolar membrane (GO:0005774);; Cellular Component: plasma membrane (GO:0005886);; Biological Process: response to stress (GO:0006950);; Cellular Component: chloroplast (GO:0009507);;	K17081|2.17277e-180|brp:103854389|prohibitin-1, mitochondrial; K17081 prohibitin 2 (A)
RSG00243	6.82849	5.75102	6.00563	5.90789	3.47439	5.82575	2.2177	2.77013	1.14443	0.667325	-0.258495	normal	0.000570395	1.59894	up	0.00472019	1.36195	up	Molecular Function: DNA binding (GO:0003677);; Molecular Function: sequence-specific DNA binding transcription factor activity (GO:0003700);; Cellular Component: nucleus (GO:0005634);; Biological Process: multicellular organismal development (GO:0007275);; Biological Process: glucuronoxylan metabolic process (GO:0010413);; Biological Process: xylan biosynthetic process (GO:0045492);; Biological P…	--
RSG00244	2.47561	2.35012	2.19769	5.60131	4.08954	5.59328	6.25658	3.257	4.85316	0.00566425	1.11631	up	0.015753	-1.04104	normal	0.878612	0.0881403	normal	Biological Process: response to molecule of bacterial origin (GO:0002237);; Molecular Function: protein serine/threonine kinase activity (GO:0004674);; Molecular Function: ATP binding (GO:0005524);; Cellular Component: plasma membrane (GO:0005886);; Biological Process: transmembrane receptor protein tyrosine kinase signaling pathway (GO:0007169);; Biological Process: lateral root morphogenesis (G…	--
RSG00245	0	0.174401	0	0.204367	0.223986	0.236247	1.0649	1.25216	0.90316	--	--	--	--	--	--	--	--	--	Cellular Component: endoplasmic reticulum (GO:0005783);;	--
RSG00246	29.573	27.1949	27.1224	21.6451	15.5148	23.4841	14.7184	17.3353	13.0145	0.230624	-0.443923	normal	0.00735964	0.902633	normal	0.22634	0.477562	normal	Cellular Component: cytoplasm (GO:0005737);; Biological Process: protein folding (GO:0006457);; Biological Process: response to heat (GO:0009408);; Biological Process: response to high light intensity (GO:0009644);; Molecular Function: heat shock protein binding (GO:0031072);; Biological Process: response to endoplasmic reticulum stress (GO:0034976);; Biological Process: response to hydrogen pero…	K09510|0|brp:103854406|dnaJ homolog subfamily B member 13; K09510 DnaJ homolog subfamily B member 4 (A)
RSG00247	48.1695	48.3122	50.1585	37.7197	31.7326	43.0551	25.3409	29.6507	22.6498	0.265249	-0.377403	normal	0.00107735	0.9419	normal	0.0674427	0.584402	normal	Cellular Component: nucleus (GO:0005634);; Cellular Component: cytosol (GO:0005829);; Cellular Component: plasma membrane (GO:0005886);; Biological Process: gluconeogenesis (GO:0006094);; Biological Process: cytoskeleton organization (GO:0007010);; Cellular Component: proteasome regulatory particle, base subcomplex (GO:0008540);; Cellular Component: plasmodesma (GO:0009506);; Biological Process: …	K03028|0|brp:103854417|26S proteasome non-ATPase regulatory subunit 2 homolog A-like; K03028 26S proteasome regulatory subunit N1 (A)
RSG00248	0	0	0	0	0	0	0	0	0	--	--	--	--	--	--	--	--	--	Cellular Component: extracellular region (GO:0005576);;	--
RSG00249	53.5716	46.7309	53.371	33.6997	25.8047	40.8886	10.8042	25.1441	13.5887	0.187946	-0.580151	normal	0.000100385	1.64184	up	0.0224589	1.08499	normal	Cellular Component: cytosol (GO:0005829);; Biological Process: ubiquitin-dependent protein catabolic process (GO:0006511);; Biological Process: photorespiration (GO:0009853);; Biological Process: response to misfolded protein (GO:0051788);; Biological Process: proteasome core complex assembly (GO:0080129);;	K07466|1.26232e-100|brp:103854427|uncharacterized protein At4g28440-like; K07466 replication factor A1 (A)
RSG00250	0.274163	0.865836	0.736222	1.92584	1.55128	1.11946	0.604792	0.29099	0.601611	0.180253	1.34018	normal	--	--	--	0.0473713	1.73933	normal	Cellular Component: nucleus (GO:0005634);; Cellular Component: endoplasmic reticulum (GO:0005783);;	--
RSG00251	4.05481	10.6509	2.90193	20.3843	17.4504	23.6194	2.73741	44.8718	14.6113	1.70886e-05	1.80602	up	0.371794	-1.83128	normal	1	0.00650799	normal	Biological Process: regulation of cell growth by extracellular stimulus (GO:0001560);; Cellular Component: cytoplasm (GO:0005737);; Biological Process: pentose-phosphate shunt (GO:0006098);; Biological Process: glycine catabolic process (GO:0006546);; Biological Process: tryptophan catabolic process (GO:0006569);; Biological Process: unsaturated fatty acid biosynthetic process (GO:0006636);; Biol…	K00815|0|brp:103854450|probable aminotransferase TAT1; K00815 tyrosine aminotransferase [EC:2.6.1.5] (A)
RSG00252	0	0	0.131238	0.190907	0.274688	0	0	0	0	--	--	--	--	--	--	--	--	--	Biological Process: regulation of cell growth by extracellular stimulus (GO:0001560);; Cellular Component: cytoplasm (GO:0005737);; Biological Process: pentose-phosphate shunt (GO:0006098);; Biological Process: glycine catabolic process (GO:0006546);; Biological Process: tryptophan catabolic process (GO:0006569);; Biological Process: unsaturated fatty acid biosynthetic process (GO:0006636);; Biol…	K00815|0|eus:EUTSA_v10025166mg|hypothetical protein; K00815 tyrosine aminotransferase [EC:2.6.1.5] (A)
RSG00253	0	0	0	0	0	0	0	0.316346	0	--	--	--	--	--	--	--	--	--	Cellular Component: extracellular region (GO:0005576);;	--
RSG00254	10.4015	20.6063	8.31865	11.4888	18.4077	14.5161	7.20995	13.0972	8.42577	0.835249	0.19873	normal	0.546703	0.458149	normal	0.103292	0.682895	normal	Molecular Function: protein serine/threonine phosphatase activity (GO:0004722);; Biological Process: metabolic process (GO:0008152);; Biological Process: systemic acquired resistance (GO:0009627);; Biological Process: negative regulation of defense response (GO:0031348);;	K17506|0|brp:103855360|probable protein phosphatase 2C 58; K17506 protein phosphatase 1L [EC:3.1.3.16] (A)
RSG00255	0.0143869	0	0.0185225	0	0	0	0	0.04448	0	--	--	--	--	--	--	--	--	--	--	--
RSG00256	63.7013	56.9803	49.6354	33.3948	44.5003	36.1151	88.2248	89.8585	72.9037	0.0795586	-0.56503	normal	0.0661755	-0.561009	normal	0.000201076	-1.10428	down	Cellular Component: nucleus (GO:0005634);;	--
RSG00257	11.1735	9.77654	6.50065	10.9196	10.3954	11.1561	16.0874	13.8968	12.3553	0.822608	0.239177	normal	0.379714	-0.599327	normal	0.652585	-0.341558	normal	--	--
RSG00258	5.80789	4.97287	5.8396	3.71289	2.82207	2.56454	4.50021	4.54631	4.76042	0.151082	-0.84155	normal	0.688615	0.257047	normal	0.377592	-0.568716	normal	Molecular Function: hydrolase activity, hydrolyzing O-glycosyl compounds (GO:0004553);; Cellular Component: extracellular region (GO:0005576);; Biological Process: carbohydrate metabolic process (GO:0005975);; Biological Process: seed germination (GO:0009845);; Molecular Function: cation binding (GO:0043169);;	--
RSG00259	12.4218	18.3012	47.026	6.54977	4.59841	2.79839	1.27303	2.25798	2.79993	0.0542107	-2.01062	normal	0.00320438	3.02856	up	0.162799	1.03303	normal	Cellular Component: nucleus (GO:0005634);;	--
RSG00260	46.7432	54.752	36.0854	54.0962	58.7063	55.2889	63.0373	69.0873	50.1448	0.313184	0.347779	normal	0.131617	-0.466543	normal	0.820939	-0.0972082	normal	Cellular Component: nucleus (GO:0005634);;	--
RSG00261	37.6072	44.7033	42.939	25.5202	13.6055	29.3621	48.6232	28.5097	18.1538	0.702523	-0.236971	normal	0.730533	-0.183674	normal	0.411053	-0.403185	normal	Cellular Component: chloroplast (GO:0009507);;	--
RSG00262	3.31275	5.34243	6.36432	2.52285	2.72711	2.37179	11.2828	11.2609	9.8965	0.780746	-0.340524	normal	0.123325	-0.998063	normal	0.0380876	-1.31627	normal	Cellular Component: plasma membrane (GO:0005886);; Cellular Component: anchored component of membrane (GO:0031225);; Cellular Component: pollen tube (GO:0090406);;	--
RSG00263	4.40658	6.08782e-07	5.86554	1.54273	2.21774	2.14663	1.88946	7.18424	5.91105	0.686851	-0.788585	normal	0.632447	-0.611204	normal	0.157509	-1.37462	normal	Molecular Function: ubiquitin-protein transferase activity (GO:0004842);; Molecular Function: protein binding (GO:0005515);; Cellular Component: nucleus (GO:0005634);; Cellular Component: endoplasmic reticulum (GO:0005783);; Molecular Function: zinc ion binding (GO:0008270);; Biological Process: protein ubiquitination (GO:0016567);;	K10666|1.77066e-122|brp:103867947|E3 ubiquitin-protein ligase RMA2-like; K10666 E3 ubiquitin-protein ligase RNF5 [EC:6.3.2.19] (A)
RSG00264	26.925	29.0284	42.4941	8.97828	4.30241	8.01899	7.5827	3.19576	16.1683	3.56057e-08	-2.20231	down	5.82538e-05	1.88422	up	0.825807	-0.31538	normal	Cellular Component: extracellular region (GO:0005576);; Biological Process: syncytium formation (GO:0006949);; Cellular Component: plasmodesma (GO:0009506);; Biological Process: unidimensional cell growth (GO:0009826);; Biological Process: plant-type cell wall loosening (GO:0009828);; Biological Process: sexual reproduction (GO:0019953);;	--
RSG00265	33.8765	35.1018	34.2655	40.721	45.0761	36.5447	77.621	59.2469	62.4554	0.529869	0.249042	normal	0.000949274	-0.946216	normal	0.0296877	-0.679303	normal	Cellular Component: nucleus (GO:0005634);;	--
RSG00266	5.47439	5.58505	5.14323	7.11839	5.23146	3.7705	5.53426	5.06769	6.43624	0.928559	-0.0686609	normal	0.99633	0.00930896	normal	0.95654	-0.0423874	normal	Biological Process: rRNA processing (GO:0006364);; Biological Process: tRNA metabolic process (GO:0006399);; Cellular Component: chloroplast (GO:0009507);; Biological Process: chloroplast organization (GO:0009658);; Biological Process: embryo development ending in seed dormancy (GO:0009793);;	--
RSG00267	14.8125	12.9039	13.5898	10.0878	12.3979	7.4748	5.35668	8.2855	3.65384	0.467495	-0.475912	normal	0.0311509	1.20306	normal	0.248517	0.75364	normal	Cellular Component: nucleus (GO:0005634);;	--
RSG00268	0.324627	0	0	0.793242	1.24129	0.448038	0	0	0	--	--	--	--	--	--	--	--	--	--	--
RSG00269	0	0	0	0	0	0	0.118987	0.0966608	0	--	--	--	--	--	--	--	--	--	Molecular Function: DNA binding (GO:0003677);; Molecular Function: sequence-specific DNA binding transcription factor activity (GO:0003700);; Cellular Component: nucleus (GO:0005634);; Biological Process: regulation of transcription, DNA-templated (GO:0006355);; Biological Process: response to chitin (GO:0010200);;	K09286|3.70791e-156|brp:103867861|ethylene-responsive transcription factor ERF054-like; K09286 EREBP-like factor (A)
RSG00270	0	0	0	0	0	0	0	0	0	--	--	--	--	--	--	--	--	--	Molecular Function: DNA binding (GO:0003677);; Molecular Function: chromatin binding (GO:0003682);; Molecular Function: sequence-specific DNA binding transcription factor activity (GO:0003700);; Cellular Component: nucleus (GO:0005634);; Biological Process: response to abscisic acid (GO:0009737);; Biological Process: response to chitin (GO:0010200);; Biological Process: cell growth (GO:0016049);;…	K09422|1.36504e-162|brp:103867859|transcription factor MYB39-like; K09422 myb proto-oncogene protein, plant (A)
RSG00271	20.0328	19.4879	17.1445	18.4187	15.868	9.00939	17.0943	9.44748	16.1371	0.464914	-0.39979	normal	0.468552	0.366281	normal	0.996227	-0.0212086	normal	Cellular Component: anchored component of plasma membrane (GO:0046658);;	--
RSG00272	4.29565	4.42638	4.13276	7.71095	8.22896	5.99767	9.2698	9.45555	10.5031	0.0374677	0.862805	normal	0.000344394	-1.36081	down	0.244816	-0.48002	normal	Cellular Component: plasma membrane (GO:0005886);; Molecular Function: phosphoric diester hydrolase activity (GO:0008081);; Molecular Function: GTP diphosphokinase activity (GO:0008728);; Biological Process: response to water deprivation (GO:0009414);; Cellular Component: chloroplast (GO:0009507);; Biological Process: response to fungus (GO:0009620);; Biological Process: jasmonic acid biosyntheti…	--
RSG00274	54.3844	47.6416	6.88969	91.725	58.4929	57.6836	14.3562	35.0269	37.04	0.34879	1.02503	normal	0.814968	0.342491	normal	0.132231	1.38209	normal	Cellular Component: mitochondrion (GO:0005739);; Biological Process: jasmonic acid metabolic process (GO:0009694);; Biological Process: response to jasmonic acid (GO:0009753);; Cellular Component: anchored component of membrane (GO:0031225);;	--
RSG00275	0	0	0	0	0	0	0	0	0	--	--	--	--	--	--	--	--	--	Cellular Component: mitochondrion (GO:0005739);; Biological Process: jasmonic acid metabolic process (GO:0009694);; Biological Process: response to jasmonic acid (GO:0009753);; Cellular Component: anchored component of membrane (GO:0031225);;	--
RSG00276	28.681	32.8926	31.5218	26.8236	29.9858	27.6953	27.8485	29.4179	23.7469	0.800634	-0.122678	normal	0.5866	0.200361	normal	0.836873	0.0985846	normal	Molecular Function: calmodulin binding (GO:0005516);; Molecular Function: ATP binding (GO:0005524);; Cellular Component: mitochondrion (GO:0005739);; Biological Process: ATP catabolic process (GO:0006200);; Cellular Component: chloroplast (GO:0009507);; Molecular Function: ATPase activity (GO:0016887);;	--
RSG00277	84.4887	92.5934	60.1986	234.382	239.792	183.396	851.681	777.785	734.692	7.4078e-07	1.27359	up	2.63946e-26	-3.27632	down	6.15863e-12	-1.98317	down	Molecular Function: cytochrome-c oxidase activity (GO:0004129);; Cellular Component: mitochondrion (GO:0005739);; Biological Process: phosphatidylinositol biosynthetic process (GO:0006661);; Cellular Component: chloroplast (GO:0009507);;	K02267|1.84101e-53|eus:EUTSA_v10026527mg|hypothetical protein; K02267 cytochrome c oxidase subunit 6b (A)
RSG00278	30.3126	30.8768	13.8417	87.8571	80.3837	57.6889	82.7319	66.0491	49.5358	8.392e-06	1.58754	up	0.000815065	-1.33048	down	0.463581	0.275745	normal	Cellular Component: chloroplast (GO:0009507);; Cellular Component: membrane (GO:0016020);;	--
RSG00279	11.1751	9.67817	16.0482	20.1196	19.2935	20.3756	10.7091	9.05536	8.44671	0.0333768	0.738642	normal	0.480299	0.316785	normal	0.00199938	1.0736	up	Cellular Component: chloroplast thylakoid membrane (GO:0009535);;	--
RSG00280	0	0	0	0	0	0.0351573	0.0322422	0.051668	0	--	--	--	--	--	--	--	--	--	Molecular Function: ATP binding (GO:0005524);; Cellular Component: plasma membrane (GO:0005886);; Molecular Function: ATPase activity (GO:0016887);;	--
RSG00281	5.62312	7.5593	9.27698	7.33995	8.41366	6.47234	11.7983	19.6523	11.9373	0.847763	0.133966	normal	0.0305618	-1.08256	normal	0.0538412	-0.924062	normal	Molecular Function: transporter activity (GO:0005215);; Cellular Component: plasma membrane (GO:0005886);; Cellular Component: integral component of membrane (GO:0016021);; Biological Process: transmembrane transport (GO:0055085);;	--
RSG00282	526.232	560.048	581.081	732.662	754.665	764.111	566.136	542.781	509.627	0.185135	0.442484	normal	0.920003	0.0450588	normal	0.127125	0.506321	normal	Molecular Function: ubiquitin-protein transferase activity (GO:0004842);; Cellular Component: cytoplasm (GO:0005737);; Cellular Component: plasma membrane (GO:0005886);; Biological Process: postreplication repair (GO:0006301);; Biological Process: fatty acid beta-oxidation (GO:0006635);; Biological Process: membrane fusion (GO:0006944);; Biological Process: protein import into peroxisome matrix (…	K06689|1.11573e-106|brp:103867752|SUMO-conjugating enzyme UBC9-like; K06689 ubiquitin-conjugating enzyme E2 D/E [EC:6.3.2.19] (A)
RSG00283	0	0	0	0	0	0	0	0	0	--	--	--	--	--	--	--	--	--	--	K03232|1.22684e-19|brp:103865769|elongation factor 1-delta 1-like; K03232 elongation factor 1-beta (A)
RSG00284	0.360435	0.148276	0.190917	0.177744	0.194845	0	0	0	0	--	--	--	--	--	--	--	--	--	Molecular Function: DNA binding (GO:0003677);; Molecular Function: sequence-specific DNA binding transcription factor activity (GO:0003700);; Molecular Function: protein binding (GO:0005515);; Cellular Component: nucleus (GO:0005634);; Biological Process: regulation of transcription, DNA-templated (GO:0006355);; Biological Process: transcription factor import into nucleus (GO:0042991);; Biologica…	--
RSG00285	2.50073	2.73113	1.81948	1.57148	2.94649	2.57634	0.48663	0.618841	0.477636	1	0.00670848	normal	0.00612077	2.24661	up	0.004382	2.27841	up	Molecular Function: phosphatidylinositol-3-phosphatase activity (GO:0004438);; Cellular Component: nucleus (GO:0005634);; Cellular Component: mitochondrial inner membrane (GO:0005743);; Biological Process: mitochondrial transport (GO:0006839);; Cellular Component: integral component of membrane (GO:0016021);; Molecular Function: metallochaperone activity (GO:0016530);; Biological Process: negativ…	K15119|0|brp:103867703|mitochondrial carrier protein MTM1-like; K15119 solute carrier family 25, member 39/40 (A)
RSG00286	0	0	0	0	0	0	0.308099	0	0	--	--	--	--	--	--	--	--	--	Molecular Function: protein phosphatase inhibitor activity (GO:0004864);; Molecular Function: receptor activity (GO:0004872);; Molecular Function: protein binding (GO:0005515);; Cellular Component: nucleus (GO:0005634);; Cellular Component: mitochondrion (GO:0005739);; Biological Process: positive regulation of abscisic acid-activated signaling pathway (GO:0009789);; Biological Process: regulatio…	K14496|4.22099e-113|brp:103867695|abscisic acid receptor PYL10-like; K14496 abscisic acid receptor PYR/PYL family (A)
RSG00287	0	0.0788461	0	0	0	0.213187	0	0	0	--	--	--	--	--	--	--	--	--	Cellular Component: cytoplasm (GO:0005737);;	--
RSG00288	25.4219	25.3714	19.008	29.3958	28.6556	26.8573	37.5795	29.482	32.021	0.455138	0.32247	normal	0.159162	-0.512341	normal	0.706471	-0.172821	normal	Molecular Function: ubiquitin-protein transferase activity (GO:0004842);; Cellular Component: nucleus (GO:0005634);; Cellular Component: mitochondrion (GO:0005739);; Biological Process: ubiquitin-dependent protein catabolic process (GO:0006511);; Biological Process: multicellular organismal development (GO:0007275);; Molecular Function: zinc ion binding (GO:0008270);; Biological Process: protein …	K04506|0|brp:103867677|E3 ubiquitin-protein ligase SINAT4-like; K04506 E3 ubiquitin-protein ligase SIAH1 [EC:6.3.2.19] (A)
RSG00289	38.5897	40.5315	46.9401	28.9125	34.0091	27.9941	66.3278	50.6677	57.8275	0.0821483	-0.533704	normal	0.0959891	-0.519094	normal	0.000392508	-1.03562	down	Cellular Component: membrane (GO:0016020);;	--
RSG00290	2.2512	8.42979	3.58008	0.299584	3.33185	1.15393	2.67429	3.67689	3.46324	0.317295	-1.57865	normal	0.626915	0.488825	normal	0.177703	-1.05763	normal	Molecular Function: iron ion transmembrane transporter activity (GO:0005381);; Molecular Function: manganese ion transmembrane transporter activity (GO:0005384);; Molecular Function: protein binding (GO:0005515);; Cellular Component: nucleus (GO:0005634);; Cellular Component: endoplasmic reticulum (GO:0005783);; Cellular Component: ER body (GO:0010168);; Cellular Component: integral component of …	--
RSG00291	0	0.213052	0	0	0.265951	0	0	0	0	--	--	--	--	--	--	--	--	--	Molecular Function: iron ion transmembrane transporter activity (GO:0005381);; Molecular Function: manganese ion transmembrane transporter activity (GO:0005384);; Molecular Function: protein binding (GO:0005515);; Cellular Component: endoplasmic reticulum (GO:0005783);; Cellular Component: ER body (GO:0010168);;	--
RSG00292	0	0	0	0	0	0	0	0	0	--	--	--	--	--	--	--	--	--	--	--
RSG00293	0	0	0	0	0.371121	0	0	0	0	--	--	--	--	--	--	--	--	--	--	--
RSG00294	0	0.133035	0	0.48392	0.337579	0.366307	0	0	0.146466	--	--	--	--	--	--	--	--	--	Cellular Component: nucleus (GO:0005634);;	--
RSG00295	9.76708	11.3906	10.6882	14.9762	13.1873	13.9801	19.6777	18.5754	18.8514	0.240784	0.452805	normal	0.00170576	-1.00338	down	0.131938	-0.532532	normal	Molecular Function: calcium ion binding (GO:0005509);; Cellular Component: proteinaceous extracellular matrix (GO:0005578);; Cellular Component: Golgi apparatus (GO:0005794);; Biological Process: signal transduction (GO:0007165);; Biological Process: actin filament-based movement (GO:0030048);;	--
RSG00297	40.1659	33.8021	39.49	39.0384	32.0138	31.5165	60.8053	45.1487	41.6797	0.823756	-0.106899	normal	0.6455	-0.167365	normal	0.493759	-0.255968	normal	Molecular Function: nucleotide binding (GO:0000166);; Cellular Component: nucleus (GO:0005634);; Cellular Component: endoplasmic reticulum (GO:0005783);; Biological Process: meristem maintenance (GO:0010073);; Molecular Function: oxidoreductase activity (GO:0016491);; Biological Process: oxidation-reduction process (GO:0055114);;	--
RSG00300	15.5326	43.3027	18.5756	34.0267	44.0627	30.5587	120.095	85.9128	73.7948	0.617882	0.443635	normal	1.90495e-05	-1.72108	down	0.000907286	-1.2575	down	Cellular Component: nucleus (GO:0005634);;	--
RSG00301	15.1896	14.1908	13.1371	21.8541	13.8333	14.8156	7.97206	6.65829	8.04603	0.571475	0.259166	normal	0.00991589	0.907316	normal	0.000978597	1.18002	up	Cellular Component: cytoplasm (GO:0005737);; Cellular Component: plasma membrane (GO:0005886);; Biological Process: oligopeptide transport (GO:0006857);; Molecular Function: oligopeptide transporter activity (GO:0015198);; Biological Process: transmembrane transport (GO:0055085);;	--
RSG00302	65.5669	61.7553	76.1599	49.1779	42.6019	42.3873	39.2094	40.0728	44.5256	0.0486754	-0.598243	normal	0.0118257	0.74718	normal	0.689382	0.165904	normal	Cellular Component: endosome (GO:0005768);; Cellular Component: Golgi apparatus (GO:0005794);; Cellular Component: trans-Golgi network (GO:0005802);; Cellular Component: plasma membrane (GO:0005886);;	--
RSG00303	102.21	96.9791	117.813	43.5302	36.4189	26.0826	72.8592	52.0143	57.6034	2.42576e-08	-1.41765	down	0.0062324	0.799339	normal	0.0615191	-0.60241	normal	Cellular Component: endosome (GO:0005768);; Cellular Component: Golgi apparatus (GO:0005794);; Cellular Component: trans-Golgi network (GO:0005802);; Cellular Component: plasma membrane (GO:0005886);;	--
RSG00304	153.369	105.416	184.934	78.761	125.514	103.656	135.797	133.453	191.89	0.33295	-0.471504	normal	0.861054	-0.0898096	normal	0.166001	-0.542895	normal	Biological Process: maltose metabolic process (GO:0000023);; Biological Process: pentose-phosphate shunt (GO:0006098);; Biological Process: aging (GO:0007568);; Cellular Component: chloroplast thylakoid membrane (GO:0009535);; Cellular Component: chloroplast envelope (GO:0009941);; Biological Process: starch biosynthetic process (GO:0019252);; Biological Process: positive regulation of catalytic …	--
RSG00305	5.65262	4.67428	6.70325	4.98566	8.38152	6.71017	9.12062	6.41733	8.60608	0.618963	0.264221	normal	0.185669	-0.535945	normal	0.587982	-0.252349	normal	Biological Process: cell morphogenesis (GO:0000902);; Cellular Component: multivesicular body (GO:0005771);; Biological Process: protein targeting to vacuole (GO:0006623);; Biological Process: membrane fusion (GO:0006944);; Biological Process: endosome to lysosome transport (GO:0008333);; Cellular Component: chloroplast (GO:0009507);; Biological Process: cell growth (GO:0016049);; Biological Proc…	K18466|0|brp:103867546|vacuolar protein sorting-associated protein 26B; K18466 vacuolar protein sorting-associated protein 26 (A)
RSG00306	57.2319	49.4879	65.5066	39.7805	26.2853	47.0079	34.0144	37.4866	32.3597	0.0749899	-0.605474	normal	0.00954816	0.767143	normal	0.668034	0.179266	normal	Molecular Function: ATP binding (GO:0005524);; Cellular Component: plasma membrane (GO:0005886);; Biological Process: ATP catabolic process (GO:0006200);; Molecular Function: ATPase activity (GO:0016887);;	--
RSG00307	8.26751	8.51622	13.456	0	0	0	0.445584	0.362597	0.483809	1.53811e-16	#NAME?	down	5.1675e-10	4.76102	up	--	--	--	Biological Process: protein folding (GO:0006457);; Cellular Component: chloroplast (GO:0009507);; Biological Process: response to high light intensity (GO:0009644);; Biological Process: heat acclimation (GO:0010286);; Biological Process: response to hydrogen peroxide (GO:0042542);;	K13993|7.26085e-116|brp:103867529|25.3 kDa heat shock protein, chloroplastic; K13993 HSP20 family protein (A)
RSG00308	0.54149	1.39446	0	0.28302	1.93383	0.549381	2.55811	7.62095	7.69035	0.850095	0.606423	normal	0.000981162	-3.35941	down	0.00710653	-2.72067	down	Cellular Component: nucleus (GO:0005634);; Cellular Component: cytosol (GO:0005829);; Cellular Component: plasma membrane (GO:0005886);; Biological Process: polyamine catabolic process (GO:0006598);; Cellular Component: plasmodesma (GO:0009506);; Biological Process: response to wounding (GO:0009611);; Biological Process: coumarin biosynthetic process (GO:0009805);; Biological Process: lignin bios…	K13066|0|eus:EUTSA_v10027501mg|hypothetical protein; K13066 caffeic acid 3-O-methyltransferase [EC:2.1.1.68] (A)
RSG00309	0	0	0.172911	0	0.0896458	0	0	0	0	--	--	--	--	--	--	--	--	--	Biological Process: methylation (GO:0032259);; Molecular Function: protein dimerization activity (GO:0046983);; Molecular Function: caffeate O-methyltransferase activity (GO:0047763);;	K13066|0|eus:EUTSA_v10025522mg|hypothetical protein; K13066 caffeic acid 3-O-methyltransferase [EC:2.1.1.68] (A)
RSG00310	4.30569	4.88338	3.43336	4.32814	2.63296	4.34479	2.55348	2.59178	3.57964	0.928777	-0.154887	normal	0.573593	0.554285	normal	0.7104	0.411732	normal	Cellular Component: nucleus (GO:0005634);; Biological Process: embryo sac egg cell differentiation (GO:0009560);;	--
RSG00311	0	0	0	0	0	0	0	25.2533	0	--	--	--	--	--	--	--	--	--	--	--
RSG00312	25.169	28.0146	33.8856	25.9907	21.0985	34.8046	25.7789	30.7254	33.1454	0.917032	-0.0790148	normal	0.974943	0.0248638	normal	0.963948	-0.0367787	normal	--	--
RSG00313	0	43.0959	34.7812	0	0	13.0898	13.0779	0	0	--	--	--	--	--	--	--	--	--	--	--
RSG00314	0	0	0	0	0	0	0	12.7804	0	--	--	--	--	--	--	--	--	--	Cellular Component: mitochondrion (GO:0005739);;	--
RSG00315	0	0	0	0	0	0	0	0	0	--	--	--	--	--	--	--	--	--	--	--
RSG00316	19.2552	22.4736	24.6733	25.7984	26.4848	28.7056	47.0622	28.3351	36.2522	0.530754	0.419953	normal	0.046742	-0.958512	normal	0.30745	-0.521501	normal	Molecular Function: nucleic acid binding (GO:0003676);; Molecular Function: catalytic activity (GO:0003824);; Biological Process: DNA metabolic process (GO:0006259);;	--
RSG00317	18.0853	17.2318	18.0938	15.0413	12.6217	16.032	12.6594	13.1894	11.3417	0.212784	-0.595442	normal	0.00150393	0.916019	normal	0.57453	0.338658	normal	Biological Process: protein import into nucleus, docking (GO:0000059);; Cellular Component: nuclear pore (GO:0005643);; Cellular Component: cytosol (GO:0005829);; Biological Process: gluconeogenesis (GO:0006094);; Biological Process: cytoskeleton organization (GO:0007010);; Molecular Function: Ran GTPase binding (GO:0008536);; Molecular Function: protein transporter activity (GO:0008565);; Biolog…	--
RSG00319	9.6738	7.20923	9.69157	9.5325	9.55658	9.73989	4.50982	4.4276	4.55631	0.826208	0.14144	normal	0.0335797	0.94966	normal	0.00852674	1.11016	up	Cellular Component: nucleus (GO:0005634);;	--
RSG00320	10.0774	7.29945	7.81828	6.33587	6.57329	6.43567	7.62765	8.69207	6.6249	0.327794	-0.462361	normal	0.914785	0.0627235	normal	0.424827	-0.379729	normal	--	--
RSG00321	61.319	47.611	74.9752	56.6062	46.8445	61.1975	52.2189	56.6242	50.5572	0.755484	-0.14797	normal	0.560121	0.202722	normal	0.876508	0.0729949	normal	Cellular Component: mitochondrion (GO:0005739);; Cellular Component: chloroplast (GO:0009507);; Biological Process: chloroplast relocation (GO:0009902);; Biological Process: thylakoid membrane organization (GO:0010027);; Biological Process: photosynthesis (GO:0015979);; Molecular Function: kinase activity (GO:0016301);; Biological Process: phosphorylation (GO:0016310);; Molecular Function: phosph…	--
RSG00322	4.4966	5.64026	5.09301	3.13529	3.89843	2.53239	4.88595	3.46794	5.60835	0.0603448	-0.667894	normal	0.773977	0.127075	normal	0.203827	-0.525021	normal	Cellular Component: nucleus (GO:0005634);; Biological Process: microtubule nucleation (GO:0007020);; Biological Process: flower development (GO:0009908);;	--
RSG00323	0.192585	1.44134	0.515048	1.63354	0.25441	0.539346	2.26049	0.214641	0.826512	--	--	--	--	--	--	--	--	--	Molecular Function: copper ion binding (GO:0005507);; Cellular Component: nucleus (GO:0005634);; Biological Process: copper ion transport (GO:0006825);;	--
RSG00324	40.6473	39.9169	47.4781	24.0421	14.3802	23.7815	21.3619	23.498	18.7697	0.000477271	-0.988386	normal	0.000954212	0.989613	normal	0.980846	0.0186685	normal	Cellular Component: mitochondrion (GO:0005739);; Molecular Function: zinc ion binding (GO:0008270);; Cellular Component: membrane (GO:0016020);;	--
RSG00325	0	0	0	0	0	0	0	0	0	--	--	--	--	--	--	--	--	--	Cellular Component: cell wall (GO:0005618);; Cellular Component: nucleus (GO:0005634);; Cellular Component: mitochondrion (GO:0005739);;	--
RSG00326	34.0546	31.8786	27.2092	27.3999	26.5846	40.2891	34.2296	37.1895	31.0168	0.9641	0.0397926	normal	0.742368	-0.15837	normal	0.857493	-0.0983401	normal	Cellular Component: endoplasmic reticulum (GO:0005783);; Biological Process: autophagy (GO:0006914);; Biological Process: vesicle-mediated transport (GO:0016192);;	--
RSG00327	71.1038	57.5735	72.1424	50.0296	71.3085	61.9399	150.794	134.463	106.581	0.835163	-0.105643	normal	0.000469247	-0.999382	normal	0.000223359	-1.08257	down	Molecular Function: copper ion binding (GO:0005507);; Cellular Component: vacuole (GO:0005773);; Molecular Function: electron carrier activity (GO:0009055);; Cellular Component: chloroplast (GO:0009507);; Biological Process: glucosinolate biosynthetic process (GO:0019761);; Cellular Component: anchored component of plasma membrane (GO:0046658);; Cellular Component: apoplast (GO:0048046);;	--
RSG00328	0	0	0	0	0	0	0	0	0	--	--	--	--	--	--	--	--	--	--	--
RSG00329	8.41211	6.59488	7.47883	8.71198	6.90549	8.14078	8.18633	9.48447	9.9814	0.916343	0.0739225	normal	0.539884	-0.267608	normal	0.721788	-0.176672	normal	Cellular Component: mitochondrion (GO:0005739);; Biological Process: petal formation (GO:0048451);; Biological Process: sepal formation (GO:0048453);;	--
RSG00330	2.8067	2.50869	3.15834	2.7137	2.57959	2.49555	2.46698	2.73194	3.73946	0.890934	-0.114212	normal	0.877822	-0.102491	normal	0.756544	-0.200515	normal	Molecular Function: GTPase activity (GO:0003924);; Molecular Function: GTP binding (GO:0005525);; Cellular Component: endoplasmic reticulum membrane (GO:0005789);; Cellular Component: cytosol (GO:0005829);; Cellular Component: plasma membrane (GO:0005886);; Biological Process: protein targeting to membrane (GO:0006612);; Biological Process: nucleotide transport (GO:0006862);; Biological Process: …	--
RSG00331	42.9492	40.9146	41.9686	16.2468	7.73592	35.8601	8.04745	19.6941	5.61174	0.0508381	-1.06206	normal	1.77129e-09	1.92826	up	0.52422	0.893721	normal	Molecular Function: 3'-5'-exoribonuclease activity (GO:0000175);; Molecular Function: RNA binding (GO:0003723);; Cellular Component: nucleus (GO:0005634);; Cellular Component: cytoplasm (GO:0005737);; Biological Process: RNA processing (GO:0006396);; Biological Process: seed germination (GO:0009845);; Biological Process: regulation of flower development (GO:0009909);; Biological Process: histone …	K12587|3.23149e-177|brp:103867212|exosome complex component MTR3; K12587 exosome complex component MTR3 (A)
RSG00332	0.0837888	0	0	0	0	0	0	0.0867099	0	--	--	--	--	--	--	--	--	--	Cellular Component: Golgi apparatus (GO:0005794);; Molecular Function: acetylglucosaminyltransferase activity (GO:0008375);; Cellular Component: membrane (GO:0016020);; Biological Process: carbohydrate biosynthetic process (GO:0016051);;	--
RSG00333	1.36143e-15	2.98078	1.16497e-139	0.564752	5.01165	3.68473	3.09878	0.265727	6.7319e-25	0.436057	1.67259	normal	0.967306	-0.248424	normal	0.44202	1.44749	normal	Molecular Function: ubiquitin-protein transferase activity (GO:0004842);; Cellular Component: nucleus (GO:0005634);; Cellular Component: endoplasmic reticulum (GO:0005783);; Molecular Function: zinc ion binding (GO:0008270);; Biological Process: protein ubiquitination (GO:0016567);;	K10666|2.41241e-140|brp:103867189|E3 ubiquitin-protein ligase RMA3; K10666 E3 ubiquitin-protein ligase RNF5 [EC:6.3.2.19] (A)
RSG00334	1.06774	1.0841	1.4206	0.95399	0.837294	0.637653	0.479122	0.315538	0.735208	--	--	--	--	--	--	--	--	--	Cellular Component: extracellular region (GO:0005576);; Biological Process: response to wounding (GO:0009611);; Biological Process: response to fungus (GO:0009620);; Biological Process: jasmonic acid biosynthetic process (GO:0009695);; Biological Process: response to jasmonic acid (GO:0009753);; Molecular Function: adenyl nucleotide binding (GO:0030554);;	--
RSG00335	0	0	0	0	0	0	0	0	0	--	--	--	--	--	--	--	--	--	--	--
RSG00336	0	0	0	0	0	0	0	0	0	--	--	--	--	--	--	--	--	--	--	--
RSG00337	0	0	0.373895	0	0	0	0	0	0	--	--	--	--	--	--	--	--	--	--	--
RSG00339	3664.52	2509.61	5608.93	2347.08	2026.82	3189.13	1452.33	1611.76	1764.81	0.374113	-0.622514	normal	0.025087	1.28039	normal	0.0971529	0.675247	normal	Molecular Function: nucleotide binding (GO:0000166);; Biological Process: aromatic amino acid family biosynthetic process (GO:0009073);; Cellular Component: chloroplast thylakoid membrane (GO:0009535);; Biological Process: response to ethylene (GO:0009723);; Cellular Component: chloroplast envelope (GO:0009941);; Biological Process: leaf morphogenesis (GO:0009965);; Biological Process: chlorophyl…	K00218|0|eus:EUTSA_v10025367mg|hypothetical protein; K00218 protochlorophyllide reductase [EC:1.3.1.33] (A)
RSG00340	13.1296	12.7966	7.10588	19.1689	12.5364	20.8053	13.0064	14.1661	17.8505	0.288268	0.701926	normal	0.51649	-0.447076	normal	0.702605	0.269299	normal	Cellular Component: extracellular region (GO:0005576);; Biological Process: glucuronoxylan metabolic process (GO:0010413);; Biological Process: xylan biosynthetic process (GO:0045492);;	--
RSG00341	15.6729	14.2241	11.7285	12.9598	13.1876	9.94572	21.0446	14.9299	15.1714	0.682855	-0.181137	normal	0.367776	-0.302173	normal	0.172972	-0.465865	normal	Cellular Component: nucleus (GO:0005634);; Cellular Component: Golgi apparatus (GO:0005794);; Cellular Component: plasma membrane (GO:0005886);; Biological Process: response to light stimulus (GO:0009416);; Biological Process: anthocyanin-containing compound biosynthetic process (GO:0009718);; Biological Process: chlorophyll biosynthetic process (GO:0015995);; Biological Process: carotenoid biosy…	--
RSG00342	0	0	0	0	0	0	0	0	0	--	--	--	--	--	--	--	--	--	--	--
RSG00343	0	0	0	0	0	0	0	0	0	--	--	--	--	--	--	--	--	--	Molecular Function: ATP binding (GO:0005524);; Biological Process: ATP catabolic process (GO:0006200);; Cellular Component: membrane (GO:0016020);; Molecular Function: ATPase activity, coupled to transmembrane movement of substances (GO:0042626);;	--
RSG00344	171.81	129.598	142.975	145.509	75.1586	163.573	83.887	126.833	72.1647	0.851168	-0.145104	normal	0.0879622	0.638943	normal	0.438643	0.513758	normal	--	--
RSG00345	0.0179722	0.0393159	0.066398	0	0	0	0	0	0	--	--	--	--	--	--	--	--	--	Molecular Function: nucleotide binding (GO:0000166);; Molecular Function: motor activity (GO:0003774);; Cellular Component: mitochondrial inner membrane (GO:0005743);; Cellular Component: plasma membrane (GO:0005886);; Biological Process: ATP catabolic process (GO:0006200);; Biological Process: cellular iron ion homeostasis (GO:0006879);; Cellular Component: integral component of membrane (GO:001…	--
RSG00346	2.60627	5.38616	11.6225	1.40465	53.8112	3.68914	0	0	1.96592	--	--	--	--	--	--	--	--	--	Molecular Function: microtubule motor activity (GO:0003777);; Cellular Component: cytoplasm (GO:0005737);; Cellular Component: microtubule associated complex (GO:0005875);; Biological Process: microtubule-based process (GO:0007017);;	K10418|2.13525e-68|brp:103867072|dynein light chain 2, cytoplasmic; K10418 dynein light chain LC8-type (A)
RSG00347	6.84842	7.52282	3.92774	3.22072	4.07272	2.96862	2.3208	1.57126	1.77223	0.218734	-0.828912	normal	0.00638559	1.73709	up	0.243856	0.926284	normal	Biological Process: response to chitin (GO:0010200);;	--
RSG00348	21.7158	18.4797	31.6442	8.38178	6.39399	9.86279	4.69822	4.14069	3.87565	0.00184777	-1.56266	down	1.00654e-06	2.49969	up	0.0112802	0.954481	normal	Cellular Component: nucleus (GO:0005634);; Cellular Component: mitochondrial matrix (GO:0005759);; Biological Process: tRNA methylation (GO:0030488);; Molecular Function: tRNA (guanine(37)-N(1))-methyltransferase activity (GO:0052906);;	K15429|0|brp:103867054|tRNA (guanine(37)-N1)-methyltransferase 2; K15429 tRNA (guanine37-N1)-methyltransferase [EC:2.1.1.228] (A)
RSG00349	0	0	0	0	0	0	0	0	0	--	--	--	--	--	--	--	--	--	Molecular Function: sequence-specific DNA binding transcription factor activity (GO:0003700);; Molecular Function: protein binding (GO:0005515);; Cellular Component: nucleus (GO:0005634);; Biological Process: anther development (GO:0048653);;	--
RSG00350	24.4436	26.0645	46.6875	24.5824	25.0648	14.7494	32.2324	30.7981	9.43609	0.367933	-0.588574	normal	0.550491	0.437645	normal	0.897561	-0.126452	normal	Biological Process: cell morphogenesis (GO:0000902);; Biological Process: response to molecule of fungal origin (GO:0002238);; Cellular Component: nucleus (GO:0005634);; Cellular Component: cytosol (GO:0005829);; Cellular Component: plasma membrane (GO:0005886);; Biological Process: response to stress (GO:0006950);; Biological Process: Golgi vesicle transport (GO:0048193);; Biological Process: ro…	--
RSG00351	5.25336	3.48791	4.81741	5.43761	6.3378	8.25012	10.7348	9.25961	17.2451	0.202142	0.593958	normal	0.000573866	-1.41357	down	0.0713126	-0.80391	normal	--	--
RSG00352	87.8965	64.3444	79.7247	123.96	106.094	108.799	153.816	125.83	117.842	0.0688508	0.558005	normal	0.0100699	-0.752407	normal	0.658621	-0.176939	normal	Molecular Function: sequence-specific DNA binding transcription factor activity (GO:0003700);; Cellular Component: nucleus (GO:0005634);; Biological Process: regulation of transcription, DNA-templated (GO:0006355);; Molecular Function: zinc ion binding (GO:0008270);;	--
RSG00353	13.5406	11.7328	7.05853	38.5089	34.3271	20.9243	20.282	14.7	10.2569	0.00226427	1.55665	up	0.322221	-0.494109	normal	0.0231383	1.08118	normal	Molecular Function: protein serine/threonine kinase activity (GO:0004674);; Molecular Function: ATP binding (GO:0005524);; Cellular Component: plasma membrane (GO:0005886);; Cellular Component: plasmodesma (GO:0009506);; Molecular Function: carbohydrate binding (GO:0030246);; Molecular Function: ubiquitin protein ligase binding (GO:0031625);; Biological Process: protein autophosphorylation (GO:00…	--
RSG00354	0.0244829	0.535938	0.0594586	0.0902497	0.612536	0.140217	0	0.128281	0	0.889625	0.556618	normal	--	--	--	--	--	--	--	--
RSG00355	12.0741	7.72438	9.66936	2.54147	6.65452	4.80405	12.7755	20.1369	15.6244	0.0500293	-1.10946	normal	0.164034	-0.674154	normal	0.000161016	-1.75565	down	Molecular Function: copper ion binding (GO:0005507);; Molecular Function: calcium ion binding (GO:0005509);; Molecular Function: protein binding (GO:0005515);; Cellular Component: extracellular region (GO:0005576);; Cellular Component: nucleus (GO:0005634);; Cellular Component: cytosol (GO:0005829);; Cellular Component: plasma membrane (GO:0005886);; Biological Process: protein folding (GO:000645…	--
RSG00356	12.0209	12.7652	9.91911	7.04791	6.08486	3.89871	63.0437	39.127	34.7476	0.00672859	-0.975002	normal	0.000101833	-1.97434	down	6.7764e-07	-2.93277	down	Cellular Component: chloroplast (GO:0009507);; Biological Process: auxin-activated signaling pathway (GO:0009734);; Biological Process: unidimensional cell growth (GO:0009826);; Biological Process: auxin homeostasis (GO:0010252);; Molecular Function: indole-3-acetic acid amido synthetase activity (GO:0010279);; Biological Process: response to cyclopentenone (GO:0010583);; Biological Process: posi…	K14487|0|brp:103866974|indole-3-acetic acid-amido synthetase GH3.5; K14487 auxin responsive GH3 gene family (A)
RSG00357	0	0	0	0	0	0	0	0	0	--	--	--	--	--	--	--	--	--	Molecular Function: binding (GO:0005488);;	--
RSG00358	0.560705	1.25568	0.566681	0.524782	0.229621	0.121067	2.83376	0.501476	1.55956	--	--	--	0.382458	-1.10311	normal	0.108756	-2.5528	normal	Molecular Function: nucleic acid binding (GO:0003676);; Molecular Function: sequence-specific DNA binding transcription factor activity (GO:0003700);; Molecular Function: NAD ADP-ribosyltransferase activity (GO:0003950);; Cellular Component: nucleus (GO:0005634);; Biological Process: regulation of translation (GO:0006417);; Molecular Function: zinc ion binding (GO:0008270);; Biological Process: p…	--
RSG00359	136.363	118.3	164.386	175.2	155.862	156.023	149.785	153.667	167.977	0.561896	0.245526	normal	0.700105	-0.154161	normal	0.813744	0.108215	normal	Cellular Component: nucleosome (GO:0000786);; Molecular Function: DNA binding (GO:0003677);; Cellular Component: nucleus (GO:0005634);; Biological Process: nucleosome assembly (GO:0006334);; Molecular Function: protein heterodimerization activity (GO:0046982);;	K11251|2.07819e-60|brp:103866954|probable histone H2A.3; K11251 histone H2A (A)
RSG00360	1.17161e-74	2.44245e-179	2.0954e-87	5.24564e-59	4.92306e-233	8.35207e-126	2.76204e-92	5.67542e-152	4.24097e-241	--	--	--	--	--	--	--	--	--	Cellular Component: mitochondrion (GO:0005739);; Biological Process: defense response (GO:0006952);; Molecular Function: purine ribonucleoside binding (GO:0032550);; Molecular Function: adenyl ribonucleotide binding (GO:0032559);; Molecular Function: anion binding (GO:0043168);;	--
RSG00361	0	0	0	0	0	0	0	0	0	--	--	--	--	--	--	--	--	--	--	--
RSG00362	3.25824	2.07435	2.97945	3.81986	5.19006	5.24382	3.03412	5.58058	6.20285	0.320734	0.886723	normal	0.237686	-0.928889	normal	0.998304	-0.0210872	normal	Biological Process: maltose metabolic process (GO:0000023);; Biological Process: sucrose metabolic process (GO:0005985);; Biological Process: fructose metabolic process (GO:0006000);; Biological Process: pentose-phosphate shunt (GO:0006098);; Biological Process: rRNA processing (GO:0006364);; Biological Process: response to cold (GO:0009409);; Cellular Component: chloroplast stroma (GO:0009570);;…	K03841|1.20028e-08|brp:103863263|FBPase; fructose-1,6-bisphosphatase, chloroplastic; K03841 fructose-1,6-bisphosphatase I [EC:3.1.3.11] (A)
RSG00363	11.5559	12.7612	10.8358	7.87126	8.73213	6.06941	7.29924	7.36804	7.15658	0.0800389	-0.603846	normal	0.0510091	0.670664	normal	0.873086	0.0859934	normal	Biological Process: maltose metabolic process (GO:0000023);; Biological Process: microtubule cytoskeleton organization (GO:0000226);; Biological Process: RNA splicing, via endonucleolytic cleavage and ligation (GO:0000394);; Biological Process: cytokinesis by cell plate formation (GO:0000911);; Molecular Function: microtubule motor activity (GO:0003777);; Cellular Component: cytoplasm (GO:0005737…	K10405|0|brp:103866928|kinesin-2; K10405 kinesin family member C1 (A)
RSG00364	0	0	0	0.195029	0.208972	0.43981	0.200043	0	0	--	--	--	--	--	--	--	--	--	Molecular Function: nutrient reservoir activity (GO:0045735);;	--
RSG00365	0	0	0	0	0	0	0	0	0	--	--	--	--	--	--	--	--	--	Molecular Function: nutrient reservoir activity (GO:0045735);;	--
RSG00366	0	0	0	0.199273	0	0	0.203227	0	0	--	--	--	--	--	--	--	--	--	Molecular Function: nutrient reservoir activity (GO:0045735);;	--
RSG00367	0	0	0	0	0	0	0	0	0	--	--	--	--	--	--	--	--	--	--	--
RSG00368	0	0	0	0.711772	0	0.26626	0	0	0	--	--	--	--	--	--	--	--	--	Molecular Function: nutrient reservoir activity (GO:0045735);;	--
RSG00369	208.906	205.547	223.065	169.303	177.835	196.181	134.824	166.806	139.926	0.696079	-0.166715	normal	0.0948168	0.514026	normal	0.290569	0.3676	normal	Biological Process: cellulose biosynthetic process (GO:0030244);; Biological Process: Golgi vesicle transport (GO:0048193);;	--
RSG00370	0.522838	0.659223	0.840994	0.0765019	0.416226	0.4344	0.0402493	0	0.0674208	0.400082	-1.13386	normal	0.000426062	4.71595	up	--	--	--	Cellular Component: plasma membrane (GO:0005886);; Biological Process: membrane fusion (GO:0006944);; Biological Process: cellulose microfibril organization (GO:0010215);; Biological Process: cell growth (GO:0016049);; Cellular Component: anchored component of membrane (GO:0031225);;	--
RSG00371	6.73679	8.11231	10.0115	12.8063	11.871	8.49407	37.1517	31.5923	28.3077	0.378494	0.42466	normal	7.61005e-10	-1.96165	down	1.32588e-06	-1.51903	down	Molecular Function: Rab GTPase activator activity (GO:0005097);; Cellular Component: mitochondrion (GO:0005739);; Biological Process: positive regulation of Rab GTPase activity (GO:0032851);;	--
RSG00372	689.209	777.768	1080.12	783.187	669.3	769.511	550.99	576.355	511.176	0.742277	-0.146151	normal	0.0355422	0.646374	normal	0.111952	0.518226	normal	Biological Process: RNA methylation (GO:0001510);; Molecular Function: structural constituent of ribosome (GO:0003735);; Cellular Component: nucleolus (GO:0005730);; Cellular Component: vacuolar membrane (GO:0005774);; Cellular Component: endoplasmic reticulum (GO:0005783);; Cellular Component: Golgi apparatus (GO:0005794);; Biological Process: translation (GO:0006412);; Cellular Component: plasm…	K02875|9.39899e-90|brp:103834818|60S ribosomal protein L14-2; K02875 large subunit ribosomal protein L14e (A)
RSG00373	11.6929	10.382	8.6884	8.55061	8.21913	7.02158	19.4655	16.4835	18.3821	0.375856	-0.35273	normal	0.00792011	-0.808149	normal	0.000190768	-1.14384	down	Biological Process: microtubule cytoskeleton organization (GO:0000226);; Biological Process: mitotic cell cycle (GO:0000278);; Biological Process: RNA processing (GO:0006396);; Biological Process: multicellular organismal development (GO:0007275);; Molecular Function: microtubule binding (GO:0008017);; Cellular Component: chloroplast (GO:0009507);; Biological Process: unidimensional cell growth (…	--
RSG00374	14.3276	14.1569	13.2624	12.9589	12.4639	13.5505	10.1627	6.98188	6.33481	0.920186	-0.0874045	normal	0.0990667	0.846885	normal	0.139681	0.777625	normal	Cellular Component: ESCRT II complex (GO:0000814);; Biological Process: vesicle-mediated transport (GO:0016192);;	K12188|0|brp:103861671|vacuolar protein sorting-associated protein 22 homolog 1; K12188 ESCRT-II complex subunit VPS22 (A)
RSG00375	1.12567	2.69621	1.87175	1.11947	3.27879	3.1442	1.29941	0.967115	3.36947	0.739247	0.479009	normal	1	-0.0121024	normal	0.698117	0.481187	normal	Biological Process: unsaturated fatty acid biosynthetic process (GO:0006636);; Cellular Component: chloroplast (GO:0009507);; Molecular Function: acid-amino acid ligase activity (GO:0016881);; Biological Process: phosphatidylglycerol metabolic process (GO:0046471);; Molecular Function: delta 3-trans-hexadecenoic acid phosphatidylglycerol desaturase activity (GO:0052637);; Biological Process: resp…	K10704|0|brp:103866795|fatty acid desaturase 4, chloroplastic-like; K10704 ubiquitin-conjugating enzyme E2 variant (A)
RSG00376	8.36626	9.38505	10.0296	11.4941	9.50292	13.1818	15.2202	20.8111	14.3471	0.525296	0.298165	normal	0.0132875	-0.848026	normal	0.148958	-0.529083	normal	Cellular Component: vacuole (GO:0005773);; Cellular Component: chloroplast (GO:0009507);; Biological Process: organ senescence (GO:0010260);;	--
RSG00377	5.27117	4.20834	4.95537	2.0216	1.30808	3.58184	1.80436	2.52578	1.08769	0.00841162	-1.06837	down	4.40095e-06	1.4343	up	0.677771	0.389454	normal	Cellular Component: nucleus (GO:0005634);; Cellular Component: mitochondrion (GO:0005739);; Biological Process: mRNA export from nucleus (GO:0006406);; Biological Process: sister chromatid cohesion (GO:0007062);; Biological Process: synapsis (GO:0007129);; Biological Process: reciprocal meiotic recombination (GO:0007131);; Biological Process: embryo sac egg cell differentiation (GO:0009560);; Bio…	K14861|0|brp:103866760|uncharacterized LOC103866760; K14861 nucleolar pre-ribosomal-associated protein 1 (A)
RSG00378	7.5022	9.69095	6.26968	6.43593	6.47995	7.11287	3.4898	3.2484	3.89824	0.734959	-0.209751	normal	0.00817975	1.18305	up	0.0326079	0.991311	normal	Cellular Component: nucleus (GO:0005634);;	--
RSG00379	5.98964	4.85145	3.80254	3.9197	6.33056	4.4615	5.8254	5.54489	5.56609	0.977437	0.0412657	normal	0.73439	-0.227325	normal	0.825977	-0.164626	normal	Cellular Component: nucleus (GO:0005634);; Cellular Component: mitochondrion (GO:0005739);; Molecular Function: NADH dehydrogenase (ubiquinone) activity (GO:0008137);; Molecular Function: electron carrier activity (GO:0009055);; Cellular Component: membrane (GO:0016020);; Biological Process: oxidation-reduction process (GO:0055114);;	K18160|1.18352e-86|brp:103834826|uncharacterized LOC103834826; K18160 NADH dehydrogenase [ubiquinone] 1 alpha subcomplex assembly factor 2 (A)
RSG00380	8.60928e-25	4.4928e-08	0.000504893	4.95256e-32	9.04699e-50	2.09042e-30	0.480858	0.504479	9.75969e-05	--	--	--	0.0183535	#NAME?	normal	0.024884	#NAME?	normal	Cellular Component: mitochondrion (GO:0005739);;	--
RSG00381	32.88	32.8666	31.9471	27.1472	28.421	36.265	24.7802	35.0649	24.0295	0.823241	-0.10673	normal	0.433711	0.265925	normal	0.661303	0.181866	normal	Biological Process: histidine biosynthetic process (GO:0000105);; Molecular Function: imidazoleglycerol-phosphate synthase activity (GO:0000107);; Biological Process: pyrimidine ribonucleotide biosynthetic process (GO:0009220);; Cellular Component: chloroplast stroma (GO:0009570);; Molecular Function: oxo-acid-lyase activity (GO:0016833);;	K01663|0|brp:103863841|imidazole glycerol phosphate synthase hisHF, chloroplastic; K01663 glutamine amidotransferase / cyclase [EC:2.4.2.- 4.1.3.-] (A)
RSG00382	50.0085	45.7991	46.4026	54.806	57.1036	62.9514	48.6697	39.3916	40.3326	0.408479	0.325021	normal	0.663905	0.179979	normal	0.143248	0.523456	normal	Biological Process: ubiquinone biosynthetic process (GO:0006744);; Biological Process: myo-inositol hexakisphosphate biosynthetic process (GO:0010264);; Molecular Function: pyridoxal phosphate binding (GO:0030170);;	K06997|2.89859e-168|brp:103866682|proline synthase co-transcribed bacterial homolog protein; K06997 (A)
RSG00383	133.491	127.835	168.554	172.954	185.191	154.686	481.071	286.067	397.015	0.506676	0.263367	normal	7.69373e-05	-1.41408	down	0.00195948	-1.1349	down	Cellular Component: nucleus (GO:0005634);; Molecular Function: mannose-1-phosphate guanylyltransferase (GDP) activity (GO:0008928);; Biological Process: response to heat (GO:0009408);; Biological Process: response to jasmonic acid (GO:0009753);; Molecular Function: GDP-galactose:mannose-1-phosphate guanylyltransferase activity (GO:0010471);; Molecular Function: GDP-galactose:glucose-1-phosphate g…	K14190|0|brp:103866673|VTC2; GDP-L-galactose phosphorylase 1; K14190 GDP-L-galactose phosphorylase [EC:2.7.7.69] (A)
RSG00384	185.637	159.35	173.719	117.846	85.761	148.046	92.3644	81.8915	66.5683	0.201882	-0.473481	normal	5.95452e-05	1.23367	up	0.0966884	0.777645	normal	Molecular Function: protein binding (GO:0005515);; Cellular Component: nucleus (GO:0005634);; Cellular Component: cytosol (GO:0005829);; Biological Process: gluconeogenesis (GO:0006094);; Biological Process: cytoskeleton organization (GO:0007010);; Biological Process: heat acclimation (GO:0010286);; Biological Process: proteasomal protein catabolic process (GO:0010498);; Molecular Function: pyrop…	K12160|2.4727e-55|obr:102703738|small ubiquitin-related modifier 1-like; K12160 small ubiquitin-related modifier (A)
RSG00385	12.3021	13.7712	15.1113	12.3771	3.13826	4.96027	5.25402	4.2328	2.67267	0.0406933	-1.14592	normal	0.000110429	2.27377	up	0.137446	1.14729	normal	Cellular Component: nucleus (GO:0005634);;	--
RSG00386	0.889725	0.283145	0.701156	0.157405	0.0261109	0.0010303	6.13175e-07	1.7474e-05	0.163373	--	--	--	--	--	--	--	--	--	--	--
RSG00387	0	0.228244	0	0.174937	0.376458	0.199643	0	0	0.534167	--	--	--	--	--	--	--	--	--	Molecular Function: carboxylic ester hydrolase activity (GO:0004091);; Cellular Component: extracellular region (GO:0005576);; Biological Process: lipid metabolic process (GO:0006629);;	--
RSG00388	28.2328	22.9478	34.3851	7.44047	6.63957	10.3054	9.11444	12.7665	7.88982	2.33012e-07	-1.82222	down	1.1561e-05	1.54668	up	0.662165	-0.253254	normal	Molecular Function: adenyl-nucleotide exchange factor activity (GO:0000774);; Molecular Function: copper ion binding (GO:0005507);; Cellular Component: mitochondrial matrix (GO:0005759);; Biological Process: protein folding (GO:0006457);; Biological Process: protein targeting to mitochondrion (GO:0006626);; Biological Process: pyrimidine ribonucleotide biosynthetic process (GO:0009220);; Cellular…	K03687|1.64232e-136|brp:103866579|grpE protein homolog, mitochondrial; K03687 molecular chaperone GrpE (A)
RSG00389	0	0.413858	0.136844	0	0.435783	0	0	0	0	--	--	--	--	--	--	--	--	--	Molecular Function: phosphatidate cytidylyltransferase activity (GO:0004605);; Cellular Component: mitochondrion (GO:0005739);; Cellular Component: integral component of membrane (GO:0016021);; Biological Process: CDP-diacylglycerol biosynthetic process (GO:0016024);; Biological Process: dolichol biosynthetic process (GO:0019408);;	K00981|0|brp:103866590|phosphatidate cytidylyltransferase; K00981 phosphatidate cytidylyltransferase [EC:2.7.7.41] (A)
RSG00390	55.235	62.6578	46.6272	58.5166	57.0897	56.1867	51.9835	65.1693	46.2997	0.889066	0.0710029	normal	0.931816	-0.0371463	normal	0.914437	0.0549402	normal	Biological Process: polysaccharide catabolic process (GO:0000272);; Biological Process: cytokinesis by cell plate formation (GO:0000911);; Biological Process: microtubule bundle formation (GO:0001578);; Cellular Component: cytosol (GO:0005829);; Biological Process: starch metabolic process (GO:0005982);; Biological Process: regulation of DNA replication (GO:0006275);; Biological Process: nucleolu…	K16732|0|brp:103866564|65-kDa microtubule-associated protein 2; K16732 protein regulator of cytokinesis 1 (A)
RSG00393	63.7381	56.6854	60.4518	58.3142	57.9107	61.3838	49.7697	44.9974	50.0027	0.992985	-0.0107446	normal	0.364254	0.304277	normal	0.39162	0.311525	normal	Molecular Function: protein serine/threonine phosphatase activity (GO:0004722);; Cellular Component: nucleus (GO:0005634);; Cellular Component: cytoplasm (GO:0005737);; Biological Process: toxin catabolic process (GO:0009407);;	K15423|0|brp:103866530|serine/threonine-protein phosphatase PP-X isozyme 1; K15423 serine/threonine-protein phosphatase 4 catalytic subunit [EC:3.1.3.16] (A)
RSG00394	0	0	0	0	0.0665645	0	0.0661048	0.0790353	0.0534628	--	--	--	--	--	--	--	--	--	Biological Process: long-chain fatty acid metabolic process (GO:0001676);; Biological Process: defense response to insect (GO:0002213);; Molecular Function: DNA topoisomerase type I activity (GO:0003917);; Molecular Function: DNA topoisomerase type II (ATP-hydrolyzing) activity (GO:0003918);; Molecular Function: protein binding (GO:0005515);; Cellular Component: nucleus (GO:0005634);; Cellular Co…	K03163|0|brp:103866520|DNA topoisomerase 1; K03163 DNA topoisomerase I [EC:5.99.1.2] (A)
RSG00395	1.7495	0.74237	0.929815	1.71903	2.70607	1.75629	6.87893	5.22655	4.71786	0.169352	0.923983	normal	1.99107e-07	-2.37891	down	0.000801592	-1.43302	down	Molecular Function: actin binding (GO:0003779);; Molecular Function: calcium ion binding (GO:0005509);; Cellular Component: vacuole (GO:0005773);; Biological Process: circadian rhythm (GO:0007623);; Biological Process: actin filament-based movement (GO:0030048);; Biological Process: Golgi localization (GO:0051645);; Biological Process: mitochondrion localization (GO:0051646);; Biological Process:…	--
RSG00396	31.8806	41.0258	21.4393	21.2516	31.4378	25.9179	57.8173	59.6135	50.1988	0.677684	-0.249408	normal	0.0026605	-0.863829	normal	0.000172399	-1.09085	down	Biological Process: glycerol metabolic process (GO:0006071);; Molecular Function: glycerophosphodiester phosphodiesterase activity (GO:0008889);; Cellular Component: plant-type cell wall (GO:0009505);; Biological Process: plant-type cell wall biogenesis (GO:0009832);; Biological Process: cell tip growth (GO:0009932);; Biological Process: trichome differentiation (GO:0010026);; Biological Process:…	--
RSG00397	3.29404	3.33061	3.29292	2.97018	3.12319	3.96625	2.75565	2.45136	2.74708	0.989747	0.0319723	normal	0.660142	0.309774	normal	0.611108	0.359555	normal	Cellular Component: mitochondrion (GO:0005739);;	--
RSG00398	129.229	139.361	273.392	49.2233	77.431	78.8874	171.813	50.3884	166.335	--	--	--	--	--	--	--	--	--	--	--
RSG00399	67.0742	53.1252	69.3642	67.2445	51.777	51.4005	38.6781	39.0782	48.9264	0.644371	-0.203078	normal	0.0908845	0.563488	normal	0.318136	0.375875	normal	Cellular Component: mitochondrial inner membrane presequence translocase complex (GO:0005744);; Biological Process: circadian rhythm (GO:0007623);; Cellular Component: chloroplast envelope (GO:0009941);; Biological Process: protein transport (GO:0015031);; Molecular Function: P-P-bond-hydrolysis-driven protein transmembrane transporter activity (GO:0015450);; Cellular Component: integral componen…	--
RSG00400	12.3481	12.0985	15.3155	14.0686	13.7531	10.9859	14.405	13.3151	14.6272	0.955076	-0.0408865	normal	0.863988	-0.081631	normal	0.839864	-0.104736	normal	Molecular Function: nucleotide binding (GO:0000166);; Molecular Function: RNA binding (GO:0003723);; Cellular Component: cytoplasm (GO:0005737);; Biological Process: D-xylose metabolic process (GO:0042732);;	K14411|0|brp:103866428|heterogeneous nuclear ribonucleoprotein 1; K14411 RNA-binding protein Musashi (A)
RSG00401	1.00288	0	0	0	0	0	0	0	0	--	--	--	--	--	--	--	--	--	--	--
RSG00402	7.79926	8.91048	7.31731	7.25027	8.29754	7.65219	8.31753	7.53376	8.63591	0.991235	-0.0197122	normal	0.972706	-0.0254161	normal	0.976066	-0.0270896	normal	Molecular Function: sequence-specific DNA binding transcription factor activity (GO:0003700);; Cellular Component: nucleus (GO:0005634);; Biological Process: response to wounding (GO:0009611);; Biological Process: virus induced gene silencing (GO:0009616);; Biological Process: response to 1-aminocyclopropane-1-carboxylic acid (GO:0009961);; Biological Process: vegetative phase change (GO:0010050)…	--
RSG00403	43.4746	46.8957	47.3512	49.5934	52.2687	41.5644	35.4435	40.4923	35.8243	0.875676	0.0809637	normal	0.347231	0.323593	normal	0.214034	0.424324	normal	Molecular Function: DNA binding (GO:0003677);; Cellular Component: nucleus (GO:0005634);; Cellular Component: mitochondrion (GO:0005739);; Cellular Component: cytosol (GO:0005829);;	--
RSG00404	14.0831	14.7637	14.0385	16.3255	16.3627	16.1518	44.2072	33.8424	33.4921	0.650222	0.221328	normal	6.70112e-06	-1.35913	down	0.000299075	-1.11995	down	Cellular Component: nucleus (GO:0005634);; Cellular Component: cytosol (GO:0005829);; Biological Process: vernalization response (GO:0010048);;	--
RSG00405	15.2499	14.3581	14.3548	15.2042	16.0004	11.9156	10.9338	11.6523	11.619	1	-0.00481117	normal	0.417949	0.308489	normal	0.418791	0.322648	normal	Molecular Function: protein serine/threonine kinase activity (GO:0004674);; Molecular Function: protein binding (GO:0005515);; Molecular Function: ATP binding (GO:0005524);; Cellular Component: nucleus (GO:0005634);; Biological Process: protein phosphorylation (GO:0006468);; Cellular Component: basal plasma membrane (GO:0009925);; Biological Process: basipetal auxin transport (GO:0010540);; Biolo…	--
RSG00406	28.4504	24.8338	23.1926	6.2282	3.34054	13.5432	4.78334	8.17073	2.2444	6.20694e-07	-1.72834	down	9.48147e-15	2.36001	up	0.61296	0.657893	normal	Molecular Function: RNA binding (GO:0003723);; Cellular Component: nucleolus (GO:0005730);; Cellular Component: cytosol (GO:0005829);; Biological Process: rRNA processing (GO:0006364);; Biological Process: protein folding (GO:0006457);; Biological Process: protein import into nucleus (GO:0006606);; Biological Process: cell proliferation (GO:0008283);; Molecular Function: S-adenosylmethionine-depe…	K14835|0|brp:103866374|putative ribosomal RNA methyltransferase nop2; K14835 ribosomal RNA methyltransferase Nop2 [EC:2.1.1.-] (A)
RSG00407	0	0	0	0	0.120594	0.0865574	0	0	0	--	--	--	--	--	--	--	--	--	Cellular Component: cytoplasm (GO:0005737);; Biological Process: protein targeting to membrane (GO:0006612);; Biological Process: oligopeptide transport (GO:0006857);; Biological Process: nucleotide transport (GO:0006862);; Biological Process: ER to Golgi vesicle-mediated transport (GO:0006888);; Biological Process: membrane fusion (GO:0006944);; Biological Process: regulation of plant-type hyper…	--
RSG00408	0.271994	0.289492	0	0.44126	0	0	0.229593	0.0938442	0.784976	--	--	--	--	--	--	--	--	--	Molecular Function: zinc ion binding (GO:0008270);;	--
RSG00409	23.6337	22.6493	22.7846	14.3694	15.6622	15.9122	17.5642	15.9948	18.5335	0.077942	-0.56769	normal	0.231332	0.400441	normal	0.738742	-0.149272	normal	Biological Process: MAPK cascade (GO:0000165);; Molecular Function: calcium ion binding (GO:0005509);; Biological Process: detection of calcium ion (GO:0005513);; Molecular Function: protein binding (GO:0005515);; Cellular Component: plasma membrane (GO:0005886);; Biological Process: regulation of transcription, DNA-templated (GO:0006355);; Biological Process: protein targeting to membrane (GO:00…	K06268|2.98481e-155|brp:103866317|calcineurin B-like protein 3; K06268 serine/threonine-protein phosphatase 2B regulatory subunit (A)
RSG00410	11.0469	13.7132	12.6665	13.1479	8.78383	11.1928	14.0729	17.4746	18.6283	0.695557	-0.260017	normal	0.445979	-0.377355	normal	0.191559	-0.621584	normal	Cellular Component: endosome (GO:0005768);; Cellular Component: Golgi apparatus (GO:0005794);; Cellular Component: trans-Golgi network (GO:0005802);; Cellular Component: plasma membrane (GO:0005886);; Biological Process: intra-Golgi vesicle-mediated transport (GO:0006891);; Biological Process: membrane fusion (GO:0006944);; Cellular Component: integral component of membrane (GO:0016021);;	--
RSG00411	4.74084	8.34325	4.92607	3.67661	4.76001	2.7734	3.27935	1.94024	2.35388	0.27221	-0.716584	normal	0.0270865	1.24259	normal	0.256631	0.543767	normal	Biological Process: response to molecule of bacterial origin (GO:0002237);; Molecular Function: protein serine/threonine kinase activity (GO:0004674);; Molecular Function: ATP binding (GO:0005524);; Cellular Component: plasma membrane (GO:0005886);; Biological Process: acetyl-CoA metabolic process (GO:0006084);; Biological Process: protein phosphorylation (GO:0006468);; Biological Process: transm…	--
RSG00412	12.5718	12.2	14.3294	15.6033	18.6139	27.0412	12.6689	9.77721	23.7343	0.141519	0.49852	normal	0.930438	-0.0716932	normal	0.468256	0.439207	normal	Biological Process: maltose metabolic process (GO:0000023);; Molecular Function: fructose-bisphosphate aldolase activity (GO:0004332);; Biological Process: glycolytic process (GO:0006096);; Biological Process: pentose-phosphate shunt (GO:0006098);; Cellular Component: chloroplast (GO:0009507);; Biological Process: anthocyanin-containing compound biosynthetic process (GO:0009718);; Biological Proc…	K01623|0|brp:103866289|fructose-bisphosphate aldolase, cytoplasmic isozyme; K01623 fructose-bisphosphate aldolase, class I [EC:4.1.2.13] (A)
RSG00414	29.4976	14.9346	33.1082	16.8282	8.85153	19.7184	11.1409	18.5257	10.4295	0.294106	-0.775948	normal	0.0997341	0.976134	normal	0.765629	0.220888	normal	Cellular Component: mitochondrion (GO:0005739);; Molecular Function: enzyme activator activity (GO:0008047);; Biological Process: aromatic amino acid family biosynthetic process (GO:0009073);; Cellular Component: chloroplast stroma (GO:0009570);; Biological Process: embryo development ending in seed dormancy (GO:0009793);; Biological Process: thylakoid membrane organization (GO:0010027);; Biologi…	--
RSG00415	6.59205	5.70212	6.33972	7.58978	12.5753	7.6286	7.34137	5.65165	6.56018	0.655188	0.305307	normal	0.85012	-0.129878	normal	0.769523	0.197045	normal	--	--
RSG00416	0	0.213229	0	0.252749	0.548252	0	0	0	0	--	--	--	--	--	--	--	--	--	Molecular Function: RNA binding (GO:0003723);; Cellular Component: nucleus (GO:0005634);;	--
RSG00417	0	0	0	0	0	0	0	0	0	--	--	--	--	--	--	--	--	--	--	--
RSG00418	0	0	0	0	0	0	0	0	0	--	--	--	--	--	--	--	--	--	Biological Process: pollen development (GO:0009555);; Biological Process: pollen tube growth (GO:0009860);; Biological Process: response to zinc ion (GO:0010043);; Biological Process: phloem transport (GO:0010233);; Molecular Function: nicotianamine synthase activity (GO:0030410);; Biological Process: nicotianamine biosynthetic process (GO:0030418);; Biological Process: cellular response to iron …	K05953|0|brp:103866247|nicotianamine synthase 1; K05953 nicotianamine synthase [EC:2.5.1.43] (A)
RSG00419	36.9686	30.3496	19.4657	23.4417	17.6862	17.4872	15.752	11.553	14.5803	0.379744	-0.469421	normal	0.0110587	1.10299	normal	0.0897203	0.647818	normal	Molecular Function: RNA binding (GO:0003723);; Cellular Component: nucleus (GO:0005634);;	K14945|0|brp:103866225|KH domain-containing protein At4g26480; K14945 protein quaking (A)
RSG00420	0.113822	0.844967	0.141412	0	0	0	0	0	0	--	--	--	--	--	--	--	--	--	Biological Process: transition metal ion transport (GO:0000041);; Molecular Function: calcium ion binding (GO:0005509);; Cellular Component: nucleus (GO:0005634);; Cellular Component: cytoplasm (GO:0005737);; Biological Process: signal transduction (GO:0007165);; Biological Process: toxin catabolic process (GO:0009407);; Biological Process: ethylene biosynthetic process (GO:0009693);; Biological …	K13448|1.18276e-148|brp:103866236|probable calcium-binding protein CML21; K13448 calcium-binding protein CML (A)
RSG00421	5.62637	5.775	6.04607	6.70125	8.5693	5.08961	8.89823	7.77941	7.2668	0.669448	0.245198	normal	0.341783	-0.42664	normal	0.766471	-0.16106	normal	Biological Process: developmental process involved in reproduction (GO:0003006);; Molecular Function: sequence-specific DNA binding transcription factor activity (GO:0003700);; Cellular Component: nuclear envelope (GO:0005635);; Biological Process: nucleus organization (GO:0006997);; Cellular Component: cell plate (GO:0009504);; Biological Process: flavonoid biosynthetic process (GO:0009813);; Bi…	--
RSG00422	0	0	0	0	0	0	0	0	0	--	--	--	--	--	--	--	--	--	Cellular Component: nuclear envelope (GO:0005635);; Biological Process: nucleus organization (GO:0006997);; Cellular Component: cell plate (GO:0009504);; Molecular Function: protein homodimerization activity (GO:0042803);; Molecular Function: protein heterodimerization activity (GO:0046982);;	--
RSG00423	0	0	0	0	0	0	0.135955	0	0	--	--	--	--	--	--	--	--	--	Molecular Function: sequence-specific DNA binding transcription factor activity (GO:0003700);; Cellular Component: nucleus (GO:0005634);; Biological Process: regulation of transcription, DNA-templated (GO:0006355);; Biological Process: response to cold (GO:0009409);; Biological Process: pollen germination (GO:0009846);;	K18835|0|brp:103866144|probable WRKY transcription factor 34; K18835 WRKY transcription factor 2 (A)
RSG00424	35.7494	37.896	28.1436	27.8688	25.5638	32.9406	15.6965	15.4631	14.5492	0.668642	-0.206679	normal	0.00139572	1.12952	up	0.0102203	0.941138	normal	Biological Process: mitotic G2 phase (GO:0000085);; Cellular Component: extracellular region (GO:0005576);; Cellular Component: COP9 signalosome (GO:0008180);; Biological Process: nucleotide biosynthetic process (GO:0009165);; Biological Process: photomorphogenesis (GO:0009640);; Biological Process: COP9 signalosome assembly (GO:0010387);; Biological Process: cullin deneddylation (GO:0010388);; B…	K12179|0|brp:103866136|COP9 signalosome complex subunit 6b; K12179 COP9 signalosome complex subunit 6 (A)
RSG00425	0.0593342	0	0	0	0	0.0845732	0.314724	0.189687	0.454902	--	--	--	--	--	--	--	--	--	Molecular Function: S-adenosylmethionine-dependent methyltransferase activity (GO:0008757);; Molecular Function: gibberellin carboxyl-O-methyltransferase activity (GO:0010341);; Biological Process: methylation (GO:0032259);;	K18885|2.34531e-126|brp:103866120|gibberellic acid methyltransferase 1; K18885 gibberellin A9 O-methyltransferase [EC:2.1.1.275] (A)
RSG00426	71.588	73.8456	85.1148	78.9267	74.7424	76.7726	53.0587	52.386	46.9698	0.968459	0.0283379	normal	0.0465803	0.611439	normal	0.0400597	0.658666	normal	Cellular Component: nucleus (GO:0005634);; Cellular Component: mitochondrion (GO:0005739);;	--
RSG00427	0.477469	3.67315e-08	0.000129557	0.795176	0.120019	2.40589	9.46994e-07	0.205298	0.955417	--	--	--	--	--	--	--	--	--	Biological Process: response to superoxide (GO:0000303);; Molecular Function: zinc ion binding (GO:0008270);; Biological Process: response to salt stress (GO:0009651);; Biological Process: response to auxin (GO:0009733);; Biological Process: response to abscisic acid (GO:0009737);; Biological Process: response to carbohydrate (GO:0009743);; Biological Process: ethylene-activated signaling pathway…	K11982|1.99632e-109|brp:103866098|E3 ubiquitin-protein ligase RNF126-like; K11982 E3 ubiquitin-protein ligase RNF115/126 [EC:6.3.2.19] (A)
RSG00428	147.786	117.385	166.396	100.251	89.5386	99.2153	85.3366	67.9518	89.6698	0.0481765	-0.589435	normal	0.00413378	0.828931	normal	0.490098	0.254917	normal	Molecular Function: RNA binding (GO:0003723);; Cellular Component: mitochondrion (GO:0005739);; Biological Process: aromatic amino acid family biosynthetic process (GO:0009073);; Cellular Component: chloroplast (GO:0009507);; Biological Process: stomatal complex morphogenesis (GO:0010103);; Biological Process: iron-sulfur cluster assembly (GO:0016226);; Biological Process: transcription from plas…	--
RSG00429	2.18927	1.3799	1.80452	1.63999	1.05696	1.45089	2.33094	1.18978	1.44042	0.824881	-0.376267	normal	0.932167	0.137451	normal	0.888726	-0.22519	normal	Cellular Component: nucleus (GO:0005634);;	--
RSG00430	0.859592	2.08928	2.36853	0.522677	1.10978	0	1.09986	0.484876	0.974687	--	--	--	--	--	--	--	--	--	--	--
RSG00431	81.1915	78.5771	81.5866	69.7494	44.061	80.4431	52.9609	64.2603	50.6697	0.396301	-0.307695	normal	0.0876373	0.534511	normal	0.57453	0.244928	normal	Molecular Function: arginine-tRNA ligase activity (GO:0004814);; Molecular Function: ATP binding (GO:0005524);; Cellular Component: mitochondrion (GO:0005739);; Cellular Component: cytosol (GO:0005829);; Biological Process: purine nucleotide biosynthetic process (GO:0006164);; Biological Process: arginyl-tRNA aminoacylation (GO:0006420);; Cellular Component: chloroplast stroma (GO:0009570);; Biol…	K01887|0|brp:103866030|arginine--tRNA ligase, cytoplasmic-like; K01887 arginyl-tRNA synthetase [EC:6.1.1.19] (A)
RSG00432	0.84168	0.703582	1.30415	1.75023	1.6525	1.31917	0	0	0.200426	0.668642	0.747793	normal	--	--	--	0.00133286	5.31317	up	Cellular Component: nucleus (GO:0005634);; Cellular Component: cytoplasm (GO:0005737);; Biological Process: flavonoid metabolic process (GO:0009812);; Molecular Function: flavonoid sulfotransferase activity (GO:1990135);;	--
RSG00433	9.88958	8.342	5.23016	17.3441	18.9733	37.0108	0.352624	3.91157	2.03572	0.0443822	1.65116	normal	0.00193782	1.93469	up	0.00010624	3.61526	up	--	--
RSG00434	12.8688	21.5	12.4189	16.7924	24.0457	16.6492	41.1095	46.1713	35.5565	0.531374	0.345833	normal	6.01296e-07	-1.42474	down	0.000402591	-1.05603	down	Molecular Function: 6-phosphofructokinase activity (GO:0003872);; Molecular Function: ATP binding (GO:0005524);; Cellular Component: 6-phosphofructokinase complex (GO:0005945);; Biological Process: fructose 6-phosphate metabolic process (GO:0006002);; Biological Process: glycolytic process (GO:0006096);; Biological Process: root epidermal cell differentiation (GO:0010053);; Biological Process: ph…	K00850|0|brp:103866006|ATP-dependent 6-phosphofructokinase 3; K00850 6-phosphofructokinase 1 [EC:2.7.1.11] (A)
RSG00435	0	0	0	0	0	0	0	0	0	--	--	--	--	--	--	--	--	--	Molecular Function: 6-phosphofructokinase activity (GO:0003872);; Molecular Function: ATP binding (GO:0005524);; Cellular Component: 6-phosphofructokinase complex (GO:0005945);; Biological Process: fructose 6-phosphate metabolic process (GO:0006002);; Biological Process: glycolytic process (GO:0006096);; Biological Process: root epidermal cell differentiation (GO:0010053);; Biological Process: ph…	K00850|2.55479e-77|eus:EUTSA_v10025029mg|hypothetical protein; K00850 6-phosphofructokinase 1 [EC:2.7.1.11] (A)
RSG00436	0	0	0	0	0	0	0	0	0	--	--	--	--	--	--	--	--	--	--	K00469|2.14976e-26|brp:103828278|inositol oxygenase 2; K00469 inositol oxygenase [EC:1.13.99.1] (A)
RSG00437	121.765	125.135	134.728	76.4689	58.0674	138.934	76.3171	68.4821	58.1923	0.352477	-0.443576	normal	0.00267666	0.903398	normal	0.427424	0.477712	normal	Molecular Function: structural constituent of ribosome (GO:0003735);; Cellular Component: cell wall (GO:0005618);; Cellular Component: plasma membrane (GO:0005886);; Biological Process: translation (GO:0006412);; Cellular Component: plasmodesma (GO:0009506);; Cellular Component: chloroplast (GO:0009507);; Cellular Component: cytosolic large ribosomal subunit (GO:0022625);; Biological Process: rib…	K02910|4.78626e-64|brp:103845101|60S ribosomal protein L31-3; K02910 large subunit ribosomal protein L31e (A)
RSG00438	60.895	63.5442	74.3092	65.2991	51.3024	47.2908	54.9855	57.4901	51.5577	0.546295	-0.243429	normal	0.620028	0.182752	normal	0.938002	-0.0436306	normal	Cellular Component: cytosol (GO:0005829);; Biological Process: methylation (GO:0032259);; Molecular Function: caffeoyl-CoA O-methyltransferase activity (GO:0042409);;	K00588|9.47259e-158|brp:103865968|probable caffeoyl-CoA O-methyltransferase At4g26220; K00588 caffeoyl-CoA O-methyltransferase [EC:2.1.1.104] (A)
RSG00440	0	0	0	0	0	0	0	0	0	--	--	--	--	--	--	--	--	--	Cellular Component: nucleus (GO:0005634);; Biological Process: carbohydrate biosynthetic process (GO:0016051);; Molecular Function: transferase activity, transferring hexosyl groups (GO:0016758);;	K18819|1.99307e-28|eus:EUTSA_v10027432mg|hypothetical protein; K18819 inositol 3-alpha-galactosyltransferase [EC:2.4.1.123] (A)
RSG00441	0	0	0	0	0	0	0	0	0	--	--	--	--	--	--	--	--	--	Molecular Function: protein serine/threonine kinase activity (GO:0004674);; Molecular Function: protein serine/threonine/tyrosine kinase activity (GO:0004712);; Molecular Function: ATP binding (GO:0005524);; Cellular Component: cytosol (GO:0005829);; Biological Process: protein phosphorylation (GO:0006468);; Biological Process: actin filament organization (GO:0007015);; Biological Process: chloro…	--
RSG00442	0	0	0	0	0	0	0	0	0	--	--	--	--	--	--	--	--	--	--	--
RSG00443	0	0	0	0	0	0	0	0	0	--	--	--	--	--	--	--	--	--	--	--
RSG00444	0	0	0	0	0	0	0	0	0	--	--	--	--	--	--	--	--	--	Cellular Component: nucleus (GO:0005634);; Biological Process: carbohydrate biosynthetic process (GO:0016051);; Molecular Function: transferase activity, transferring hexosyl groups (GO:0016758);;	K18819|0|brp:103843646|galactinol synthase 6-like; K18819 inositol 3-alpha-galactosyltransferase [EC:2.4.1.123] (A)
RSG00445	0.405427	0.733207	0.224446	0	0.697982	0.162882	0	0.0606786	0	--	--	--	--	--	--	--	--	--	Cellular Component: cytoplasm (GO:0005737);; Biological Process: amino acid transport (GO:0006865);; Biological Process: ethylene biosynthetic process (GO:0009693);; Molecular Function: transferase activity (GO:0016740);; Molecular Function: 1-aminocyclopropane-1-carboxylate synthase activity (GO:0016847);; Molecular Function: pyridoxal phosphate binding (GO:0030170);; Biological Process: 1-amino…	K01762|0|brp:103865940|1-aminocyclopropane-1-carboxylate synthase 7; K01762 1-aminocyclopropane-1-carboxylate synthase [EC:4.4.1.14] (A)
RSG00446	8.46907	9.56286	6.70788	10.5227	11.7194	10.7252	9.1636	13.2832	10.8465	0.406167	0.402688	normal	0.315098	-0.446345	normal	0.977559	-0.0224899	normal	Cellular Component: mitochondrial inner membrane (GO:0005743);; Biological Process: mitochondrial transport (GO:0006839);; Molecular Function: coenzyme A transmembrane transporter activity (GO:0015228);; Cellular Component: integral component of membrane (GO:0016021);; Biological Process: transmembrane transport (GO:0055085);;	K15084|0|brp:103865929|mitochondrial substrate carrier family protein P; K15084 solute carrier family 25 (mitochondrial carrier protein), member 16 (A)
RSG00447	0	0.317264	0	0.216645	0.0778404	0.25282	0.767121	0.56023	0.376974	--	--	--	--	--	--	--	--	--	Cellular Component: extracellular region (GO:0005576);; Cellular Component: Golgi apparatus (GO:0005794);; Cellular Component: plasma membrane (GO:0005886);; Biological Process: membrane fusion (GO:0006944);; Biological Process: sister chromatid cohesion (GO:0007062);; Biological Process: synapsis (GO:0007129);; Biological Process: reciprocal meiotic recombination (GO:0007131);; Biological Proces…	--
RSG00448	0	0	0	0	0	0	0	0	0	--	--	--	--	--	--	--	--	--	--	--
RSG00449	0	0	0.264826	0	0	0.563766	0.263343	0	0.220742	--	--	--	--	--	--	--	--	--	--	--
RSG00450	1.73059	2.50185	1.42138	2.6739	2.36561	1.3033	2.60223	3.90586	1.59002	0.963916	0.115107	normal	0.611381	-0.508204	normal	0.736556	-0.368632	normal	Cellular Component: nucleus (GO:0005634);; Cellular Component: cytoplasm (GO:0005737);;	--
RSG00451	23.6301	26.9741	17.7928	33.9563	23.6742	22.3172	36.8189	40.2529	34.4569	0.582174	0.263623	normal	0.0273275	-0.763659	normal	0.199894	-0.483618	normal	Molecular Function: sequence-specific DNA binding transcription factor activity (GO:0003700);; Molecular Function: protein binding (GO:0005515);; Cellular Component: nucleus (GO:0005634);; Biological Process: regulation of transcription, DNA-templated (GO:0006355);; Biological Process: detection of ethylene stimulus (GO:0009727);; Molecular Function: sequence-specific DNA binding (GO:0043565);; B…	--
RSG00452	5.0013	4.70626	5.70262	2.24411	1.34591	2.16717	1.66068	3.15818	1.91973	0.00235648	-1.42935	down	0.0115599	1.23994	normal	0.850073	-0.168648	normal	Cellular Component: cytoplasm (GO:0005737);; Biological Process: regulation of mitotic cell cycle (GO:0007346);;	--
RSG00453	36.8332	28.5404	38.7533	47.7243	56.0861	43.8935	112.307	82.3914	97.8851	0.116016	0.497606	normal	1.53964e-07	-1.46192	down	0.00134655	-0.94637	normal	Molecular Function: calcium ion binding (GO:0005509);; Cellular Component: mitochondrion (GO:0005739);;	--
RSG00454	3.50205	3.12788	1.59896	1.96569	1.40465	2.96376	1.72115	2.09787	2.03731	0.642001	-0.375163	normal	0.310057	0.521629	normal	0.815232	0.164129	normal	Cellular Component: mitochondrion (GO:0005739);; Cellular Component: vacuole (GO:0005773);; Biological Process: toxin catabolic process (GO:0009407);; Biological Process: response to cyclopentenone (GO:0010583);;	--
RSG00455	0	0	0	0	0	0	0	0	0	--	--	--	--	--	--	--	--	--	Cellular Component: extracellular region (GO:0005576);; Molecular Function: transferase activity, transferring glycosyl groups (GO:0016757);;	--
RSG00456	0	0	0	0	0	0	0	0	0	--	--	--	--	--	--	--	--	--	Molecular Function: transferase activity (GO:0016740);;	--
RSG00457	6.32058	5.2552	7.3343	4.75029	5.46278	4.29114	4.60903	4.87172	4.83039	0.558276	-0.37306	normal	0.437449	0.428574	normal	0.9319	0.0751684	normal	Biological Process: RNA splicing, via endonucleolytic cleavage and ligation (GO:0000394);; Cellular Component: Golgi apparatus (GO:0005794);; Biological Process: protein glycosylation (GO:0006486);; Molecular Function: galactosyltransferase activity (GO:0008378);; Biological Process: methionine biosynthetic process (GO:0009086);; Cellular Component: integral component of membrane (GO:0016021);;	--
RSG00458	34.8051	35.8527	36.0483	33.5203	29.7152	29.8742	46.1886	38.948	34.1992	0.364185	0.346613	normal	0.0177316	-0.736733	normal	0.303744	-0.372451	normal	Cellular Component: vacuolar membrane (GO:0005774);; Cellular Component: Golgi apparatus (GO:0005794);; Cellular Component: plasma membrane (GO:0005886);; Biological Process: polyamine catabolic process (GO:0006598);; Biological Process: protein targeting to membrane (GO:0006612);; Biological Process: calcium ion transport (GO:0006816);; Biological Process: membrane fusion (GO:0006944);; Biologic…	K08515|1.17484e-135|brp:103851245|vesicle-associated membrane protein 711-like; K08515 vesicle-associated membrane protein 7 (A)
RSG00459	6.91436	7.06318	7.95276	8.09713	6.96752	7.51904	7.75429	7.86959	8.03707	0.946991	0.0505898	normal	0.814953	-0.115506	normal	0.941474	-0.0476902	normal	Cellular Component: extracellular region (GO:0005576);; Cellular Component: nucleus (GO:0005634);; Molecular Function: phosphatidylinositol binding (GO:0035091);; Biological Process: intracellular signal transduction (GO:0035556);; Biological Process: response to arsenic-containing substance (GO:0046685);;	--
RSG00460	22.4913	23.5048	19.7822	31.9752	29.6207	25.6539	23.4133	24.0182	18.8255	0.216345	0.409362	normal	0.970534	0.0194478	normal	0.181365	0.448423	normal	Molecular Function: pantothenate kinase activity (GO:0004594);; Molecular Function: protein binding (GO:0005515);; Molecular Function: ATP binding (GO:0005524);; Cellular Component: cytosol (GO:0005829);; Biological Process: protein N-linked glycosylation (GO:0006487);; Biological Process: coenzyme A biosynthetic process (GO:0015937);;	K09680|0|brp:103851237|pantothenate kinase 2; K09680 type II pantothenate kinase [EC:2.7.1.33] (A)
RSG00461	31.5978	24.5299	32.0206	24.2274	21.1456	20.7906	15.2732	16.6434	14.7506	0.20894	-0.41531	normal	0.00102859	0.944942	normal	0.0984156	0.547981	normal	Biological Process: response to reactive oxygen species (GO:0000302);; Biological Process: response to iron ion (GO:0010039);; Biological Process: iron ion homeostasis (GO:0055072);;	--
RSG00462	602.685	383.307	639.524	562.959	590.912	686.616	349.117	328.33	399.885	0.705922	0.181091	normal	0.0670862	0.624838	normal	0.0100094	0.823444	normal	Biological Process: MAPK cascade (GO:0000165);; Molecular Function: ATP binding (GO:0005524);; Biological Process: pentose-phosphate shunt (GO:0006098);; Biological Process: rRNA processing (GO:0006364);; Biological Process: protein targeting to membrane (GO:0006612);; Biological Process: response to cold (GO:0009409);; Cellular Component: chloroplast thylakoid membrane (GO:0009535);; Biological …	K02109|1.4503e-71|brp:103851204|ATP synthase subunit b', chloroplastic; K02109 F-type H+transporting ATPase subunit b (A)
RSG00463	15.8208	13.5903	12.7012	16.1931	21.0136	17.9281	18.0494	21.828	18.4784	0.396924	0.324944	normal	0.188476	-0.4416	normal	0.836464	-0.0947302	normal	Molecular Function: protein kinase activity (GO:0004672);; Molecular Function: ATP binding (GO:0005524);; Biological Process: protein phosphorylation (GO:0006468);; Cellular Component: chloroplast (GO:0009507);; Biological Process: organ senescence (GO:0010260);;	--
RSG00464	6.49397	5.74405	6.61002	8.76255	6.70735	7.72633	7.70513	5.03518	6.53948	0.665111	0.30733	normal	0.964331	-0.0428442	normal	0.657118	0.278685	normal	Cellular Component: nucleus (GO:0005634);; Cellular Component: plasma membrane (GO:0005886);;	--
RSG00465	2.30753	1.98782	2.91833	1.71146	2.1943	2.78361	2.17736	2.32424	2.53396	0.958588	0.0863436	normal	0.945865	0.080057	normal	0.85504	0.186442	normal	--	--
RSG00466	17.1706	9.99838	7.51597	11.2346	13.274	8.60729	35.6591	20.6621	16.5501	0.935866	0.0898323	normal	0.0598393	-1.29656	normal	0.073754	-1.18818	normal	Molecular Function: binding (GO:0005488);; Biological Process: response to auxin (GO:0009733);; Biological Process: cellular process (GO:0009987);; Biological Process: response to red light (GO:0010114);; Biological Process: response to far red light (GO:0010218);; Cellular Component: intracellular part (GO:0044424);;	K14484|2.20969e-81|brp:103851160|auxin-responsive protein IAA29; K14484 auxin-responsive protein IAA (A)
RSG00467	16.1918	20.4424	28.1473	24.8219	11.4448	16.5662	33.5942	19.3046	26.6926	0.693911	-0.29631	normal	0.544653	-0.276796	normal	0.292158	-0.563096	normal	Molecular Function: 1-phosphatidylinositol binding (GO:0005545);; Cellular Component: nucleus (GO:0005634);; Cellular Component: cytosol (GO:0005829);; Cellular Component: plasma membrane (GO:0005886);; Biological Process: regulation of transcription, DNA-templated (GO:0006355);; Biological Process: auxin-activated signaling pathway (GO:0009734);; Cellular Component: clathrin coat (GO:0030118);; …	--
RSG00468	0.0635574	0	0.0847237	0	0.0881883	0.0888184	0.484994	0.741352	0.761342	--	--	--	--	--	--	--	--	--	Molecular Function: acetylglucosaminyltransferase activity (GO:0008375);; Cellular Component: membrane (GO:0016020);;	--
RSG00469	5.30391	4.85429	5.09164	6.35231	5.93614	3.93742	9.26277	6.6168	6.13632	0.950708	0.0815027	normal	0.403504	-0.523613	normal	0.520174	-0.425797	normal	Cellular Component: mitochondrion (GO:0005739);;	--
RSG00470	9.57897	9.9272	7.57141	12.3042	11.1133	10.3866	15.7858	13.9013	13.4365	0.426345	0.328207	normal	0.0434685	-0.674147	normal	0.397152	-0.328401	normal	Molecular Function: protein serine/threonine kinase activity (GO:0004674);; Molecular Function: ATP binding (GO:0005524);; Cellular Component: plasma membrane (GO:0005886);; Molecular Function: carbohydrate binding (GO:0030246);; Molecular Function: ubiquitin protein ligase binding (GO:0031625);; Biological Process: protein autophosphorylation (GO:0046777);;	--
RSG00471	0	0.112098	0	0	0.13381	0	0.138795	0	0.115663	--	--	--	--	--	--	--	--	--	Molecular Function: protein kinase activity (GO:0004672);; Cellular Component: plasma membrane (GO:0005886);; Molecular Function: ubiquitin protein ligase binding (GO:0031625);; Biological Process: protein autophosphorylation (GO:0046777);;	--
RSG00472	43.8098	44.9152	49.463	27.171	30.9848	25.1654	28.3182	30.3769	31.8077	0.00865118	-0.752672	normal	0.0791836	0.535707	normal	0.622904	-0.198037	normal	Biological Process: maltose metabolic process (GO:0000023);; Cellular Component: nucleus (GO:0005634);; Biological Process: cytokinin-activated signaling pathway (GO:0009736);; Biological Process: starch biosynthetic process (GO:0019252);; Biological Process: positive regulation of catalytic activity (GO:0043085);;	--
RSG00473	43.8169	39.3048	78.7435	69.4762	66.9428	44.7081	58.2364	38.2253	44.0439	0.872092	0.142626	normal	0.584905	0.327321	normal	0.143945	0.486766	normal	Biological Process: leaf morphogenesis (GO:0009965);; Biological Process: cell differentiation (GO:0030154);; Biological Process: positive regulation of transcription, DNA-templated (GO:0045893);;	--
RSG00474	11.2384	10.4761	8.84355	11.0445	13.2067	11.9834	11.1514	9.0199	9.79118	0.556275	0.266905	normal	0.99977	0.00584887	normal	0.488951	0.291235	normal	Cellular Component: nucleus (GO:0005634);;	--
RSG00475	136.768	141.479	151.887	111.664	94.6996	104.634	86.926	105.802	90.9046	0.122747	-0.485894	normal	0.0406469	0.613027	normal	0.727384	0.146055	normal	Cellular Component: endosome (GO:0005768);; Cellular Component: Golgi apparatus (GO:0005794);; Cellular Component: trans-Golgi network (GO:0005802);; Cellular Component: plasma membrane (GO:0005886);; Biological Process: purine nucleobase transport (GO:0006863);; Molecular Function: organic anion transmembrane transporter activity (GO:0008514);; Biological Process: organic anion transport (GO:001…	--
RSG00476	33.1092	29.2421	30.1468	20.4752	22.9772	23.8768	15.2068	18.3786	13.02	0.194319	-0.434672	normal	0.000990199	0.974617	normal	0.101935	0.562209	normal	Cellular Component: mitochondrial inner membrane (GO:0005743);; Biological Process: protein targeting to membrane (GO:0006612);; Biological Process: mitochondrial transport (GO:0006839);; Biological Process: nucleotide transport (GO:0006862);; Biological Process: ER to Golgi vesicle-mediated transport (GO:0006888);; Biological Process: membrane fusion (GO:0006944);; Biological Process: nucleotide…	--
RSG00477	108.947	111.927	107.287	86.7762	75.982	71.7629	125.79	111.378	106.177	0.14684	-0.498314	normal	0.899269	-0.0615782	normal	0.11386	-0.542204	normal	Biological Process: cell morphogenesis (GO:0000902);; Cellular Component: endosome (GO:0005768);; Cellular Component: Golgi apparatus (GO:0005794);; Cellular Component: trans-Golgi network (GO:0005802);; Cellular Component: plasma membrane (GO:0005886);; Biological Process: glycolytic process (GO:0006096);; Biological Process: calcium ion transport (GO:0006816);; Biological Process: water transpo…	K10999|0|brp:103850985|cellulose synthase A catalytic subunit 1 [UDP-forming]; K10999 cellulose synthase A [EC:2.4.1.12] (A)
RSG00479	1.65786	1.93489	2.39533	0.670907	0.422905	0.924127	0.756325	0.843071	0.762635	0.00964383	-1.59323	down	0.0252271	1.39195	normal	0.883034	-0.183817	normal	Cellular Component: mitochondrion (GO:0005739);;	--
RSG00480	2.36755	3.94436	1.34906	1.25434	3.57619	4.59222	1.99826	5.11122	2.14502	0.883157	0.288633	normal	0.901798	-0.192993	normal	0.957583	0.128062	normal	--	--
RSG00481	7.04398	7.52937	6.50268	6.05832	8.86959	5.80335	18.314	11.9176	15.6652	0.289795	-0.404858	normal	0.000157017	-1.09682	down	4.22235e-07	-1.48268	down	Cellular Component: nucleus (GO:0005634);; Biological Process: response to chitin (GO:0010200);;	--
RSG00483	247.211	282.972	261.015	67.7982	67.371	43.0249	748.628	421.371	741.197	4.97765e-18	-2.14022	down	0.00210941	-1.30599	down	4.87605e-09	-3.43291	down	Cellular Component: extracellular region (GO:0005576);; Cellular Component: plant-type cell wall (GO:0009505);;	--
RSG00484	46.0968	54.5223	59.45	33.0483	32.1898	27.7945	46.7103	45.549	42.4258	0.0777705	-0.753659	normal	0.692431	0.198164	normal	0.254839	-0.537353	normal	Cellular Component: mitochondrial respiratory chain complex III (GO:0005750);; Cellular Component: vacuolar membrane (GO:0005774);; Biological Process: glycolytic process (GO:0006096);; Biological Process: mitochondrial electron transport, ubiquinol to cytochrome c (GO:0006122);; Biological Process: ubiquitin-dependent protein catabolic process (GO:0006511);; Molecular Function: ubiquinol-cytochr…	K00417|2.10467e-67|brp:103850902|cytochrome b-c1 complex subunit 7-1; K00417 ubiquinol-cytochrome c reductase subunit 7 (A)
RSG00485	2.96192	2.35848	0.657694	1.16077	0.531268	2.72504	3.79678	3.82457	5.31181	0.81234	-0.423193	normal	0.0183535	-1.12236	normal	0.00403217	-1.53168	down	Molecular Function: inward rectifier potassium channel activity (GO:0005242);; Biological Process: plant-type cell wall modification (GO:0009827);; Biological Process: pollen tube growth (GO:0009860);; Biological Process: actin filament-based movement (GO:0030048);; Molecular Function: cyclic nucleotide binding (GO:0030551);;	--
RSG00486	0.0572365	0.03033	0	0	0.0747086	0.0406934	0	0.0299488	0.0310914	--	--	--	--	--	--	--	--	--	Molecular Function: inorganic anion exchanger activity (GO:0005452);; Cellular Component: nucleus (GO:0005634);; Biological Process: anion transport (GO:0006820);; Cellular Component: integral component of membrane (GO:0016021);;	--
RSG00487	70.5993	67.4565	88.0394	38.8658	19.5575	48.941	26.637	36.3238	23.7867	0.00403627	-1.05619	down	3.99461e-07	1.41021	up	0.576872	0.373095	normal	Molecular Function: glycine hydroxymethyltransferase activity (GO:0004372);; Cellular Component: cytosol (GO:0005829);; Biological Process: purine nucleotide biosynthetic process (GO:0006164);; Biological Process: glycine metabolic process (GO:0006544);; Biological Process: L-serine metabolic process (GO:0006563);; Molecular Function: methyltransferase activity (GO:0008168);; Cellular Component: …	K00600|0|brp:103850860|serine hydroxymethyltransferase 3, chloroplastic; K00600 glycine hydroxymethyltransferase [EC:2.1.2.1] (A)
RSG00488	107.461	121.933	137.409	96.2874	93.0179	81.5068	137.341	121.468	121.39	0.293214	-0.365995	normal	0.894487	-0.0564146	normal	0.243276	-0.404462	normal	Cellular Component: vacuole (GO:0005773);; Biological Process: ATP catabolic process (GO:0006200);; Biological Process: calcium ion transport (GO:0006816);; Biological Process: Golgi organization (GO:0007030);; Biological Process: vacuole organization (GO:0007033);; Cellular Component: chloroplast (GO:0009507);; Biological Process: response to salt stress (GO:0009651);; Molecular Function: hydrog…	K03661|5.23286e-99|eus:EUTSA_v10026373mg|hypothetical protein; K03661 V-type H+transporting ATPase 21kDa proteolipid subunit (A)
RSG00489	0	0	0	0	0	0	0	0	0.049576	--	--	--	--	--	--	--	--	--	Cellular Component: cytoplasm (GO:0005737);; Molecular Function: transferase activity, transferring acyl groups other than amino-acyl groups (GO:0016747);;	--
RSG00490	0.721967	2.18761	1.0838	1.15356	0.66274	1.38651	1.14604	0.693265	0.629642	0.821552	-0.301715	normal	0.417845	0.701805	normal	0.668675	0.414764	normal	Molecular Function: nucleotide binding (GO:0000166);; Cellular Component: nucleus (GO:0005634);; Biological Process: protein import into nucleus (GO:0006606);;	K14552|0|eus:EUTSA_v10024453mg|hypothetical protein; K14552 NET1-associated nuclear protein 1 (U3 small nucleolar RNA-associated protein 17) (A)
RSG00491	0	0	0	0	0	0	0	0.111943	0	--	--	--	--	--	--	--	--	--	--	--
RSG00492	0	0.0591668	0	0.0696302	0.0751523	0	0	0	0	--	--	--	--	--	--	--	--	--	Molecular Function: N,N-dimethylaniline monooxygenase activity (GO:0004499);; Cellular Component: cytoplasm (GO:0005737);; Biological Process: auxin biosynthetic process (GO:0009851);; Biological Process: positive regulation of flower development (GO:0009911);; Biological Process: inflorescence development (GO:0010229);; Biological Process: regulation of anatomical structure morphogenesis (GO:002…	K11816|0|brp:103850830|probable indole-3-pyruvate monooxygenase YUCCA1; K11816 indole-3-pyruvate monooxygenase [EC:1.14.13.168] (A)
RSG00493	0.16494	0	0	0.393618	1.72169	0.0178725	0.0323471	0.0130893	0.06906	0.346688	3.79242	normal	--	--	--	0.223113	4.53687	normal	--	--
RSG00494	27.9445	26.8621	25.9688	29.3862	25.3631	28.6339	34.5471	33.719	31.5061	0.878034	0.0781156	normal	0.323127	-0.324658	normal	0.544673	-0.22856	normal	Cellular Component: nucleus (GO:0005634);; Cellular Component: cytoplasm (GO:0005737);; Biological Process: DNA methylation (GO:0006306);; Biological Process: methylation-dependent chromatin silencing (GO:0006346);; Biological Process: cell adhesion (GO:0007155);; Biological Process: cell-cell signaling (GO:0007267);; Biological Process: virus induced gene silencing (GO:0009616);; Biological Proc…	--
RSG00495	5.8106	7.2131	5.5816	6.83482	7.96121	5.6395	3.27453	3.64695	3.85606	0.834762	0.153743	normal	0.142496	0.773938	normal	0.0558299	0.946399	normal	Cellular Component: nucleus (GO:0005634);;	--
RSG00496	13.0422	11.7172	14.9275	19.2429	19.033	16.0433	17.5737	13.4884	16.1438	0.214412	0.476977	normal	0.491152	-0.284268	normal	0.63384	0.209541	normal	Molecular Function: protein binding (GO:0005515);; Cellular Component: nucleus (GO:0005634);;	--
RSG00497	0	0	0	0	0	0	0	0	0	--	--	--	--	--	--	--	--	--	--	--
RSG00498	77.3114	52.8347	103.245	74.757	72.2489	76.6072	68.2928	68.3187	82.3044	0.964711	-0.0346974	normal	0.881302	0.0706203	normal	0.922092	0.0523878	normal	Molecular Function: electron carrier activity (GO:0009055);; Biological Process: abscisic acid biosynthetic process (GO:0009688);; Molecular Function: metal ion binding (GO:0046872);; Molecular Function: iron-sulfur cluster binding (GO:0051536);;	--
RSG00499	13.0445	11.0752	14.2811	13.5381	11.9559	10.3503	15.2063	18.6375	13.9806	0.891838	-0.0908925	normal	0.471757	-0.309456	normal	0.376119	-0.380257	normal	Cellular Component: nucleus (GO:0005634);; Cellular Component: plasma membrane (GO:0005886);; Molecular Function: zinc ion binding (GO:0008270);;	--
RSG00500	83.6933	72.4825	91.3576	69.889	59.5507	66.6655	83.4079	71.3629	69.4613	0.759156	-0.136971	normal	0.925073	0.0411371	normal	0.864708	-0.0783484	normal	Molecular Function: copper ion binding (GO:0005507);; Cellular Component: mitochondrial matrix (GO:0005759);;	--
RSG00502	6.08995	5.02977	4.98529	4.67811	4.45238	4.92024	5.3873	6.28238	5.12913	0.703153	-0.182412	normal	0.916617	-0.0508274	normal	0.616709	-0.213156	normal	Cellular Component: nucleus (GO:0005634);; Biological Process: virus induced gene silencing (GO:0009616);; Biological Process: vegetative phase change (GO:0010050);; Biological Process: production of ta-siRNAs involved in RNA interference (GO:0010267);; Biological Process: production of miRNAs involved in gene silencing by miRNA (GO:0035196);;	--
RSG00503	0	0	0	0	0	0	0	0.0387288	0	--	--	--	--	--	--	--	--	--	Cellular Component: nucleus (GO:0005634);; Molecular Function: metal ion binding (GO:0046872);;	--
RSG00504	35.9397	33.665	30.5595	29.6647	26.1394	27.4518	27.7456	32.053	24.702	0.531845	-0.24242	normal	0.475229	0.245578	normal	0.97041	0.0232264	normal	Molecular Function: transporter activity (GO:0005215);; Cellular Component: cytosol (GO:0005829);; Biological Process: calcium ion transport (GO:0006816);; Biological Process: intracellular protein transport (GO:0006886);; Biological Process: ER to Golgi vesicle-mediated transport (GO:0006888);; Biological Process: response to oxidative stress (GO:0006979);; Biological Process: Golgi organization…	K14007|0|brp:103850674|protein transport protein Sec24-like At4g32640; K14007 protein transport protein SEC24 (A)
RSG00505	0.852029	3.0728	1.03641	0.346701	1.19015	1.09956	0.532553	1.48296	1.20033	0.600039	-0.863588	normal	0.614628	0.608858	normal	0.83942	-0.225608	normal	Molecular Function: inward rectifier potassium channel activity (GO:0005242);; Molecular Function: protein binding (GO:0005515);; Cellular Component: endoplasmic reticulum (GO:0005783);; Cellular Component: plasma membrane (GO:0005886);; Cellular Component: chloroplast (GO:0009507);; Biological Process: response to nematode (GO:0009624);; Biological Process: high-affinity potassium ion import (GO…	--
RSG00506	18.3217	13.9334	15.5379	16.0651	10.8406	21.0299	13.9718	14.0596	13.9756	0.991117	0.0202195	normal	0.626188	0.21524	normal	0.57785	0.252006	normal	Molecular Function: protein serine/threonine kinase activity (GO:0004674);; Molecular Function: protein tyrosine kinase activity (GO:0004713);; Molecular Function: ATP binding (GO:0005524);; Cellular Component: nucleus (GO:0005634);; Cellular Component: cytoplasm (GO:0005737);; Biological Process: positive regulation of translation (GO:0045727);; Biological Process: protein autophosphorylation (G…	K08287|0|brp:103850620|serine/threonine-protein kinase AFC3; K08287 dual-specificity kinase [EC:2.7.12.1] (A)
RSG00507	1.19035	1.06874	2.30106	0.125377	0.132099	0.254114	0.267913	0.215376	0.19851	0.00134508	-3.2336	down	0.00124317	2.84065	up	--	--	--	--	K10661|0|brp:103850648|probable E3 ubiquitin ligase SUD1; K10661 E3 ubiquitin-protein ligase MARCH6 [EC:6.3.2.19] (A)
RSG00508	0.810027	0.719669	1.25194	0	0.202178	0.215454	0	0.0526543	0	--	--	--	--	--	--	--	--	--	Cellular Component: nucleus (GO:0005634);;	K10661|0|brp:103850604|probable E3 ubiquitin ligase SUD1; K10661 E3 ubiquitin-protein ligase MARCH6 [EC:6.3.2.19] (A)
RSG00509	12.0392	14.9947	13.0719	9.99189	13.0519	16.7999	9.80121	11.1149	8.51038	0.990567	0.0272641	normal	0.533004	0.389423	normal	0.487387	0.438812	normal	--	--
RSG00510	36.2279	38.0596	28.9972	51.8984	56.783	34.7829	111.376	104.029	111.366	0.1636	0.556524	normal	3.49982e-08	-1.72121	down	0.000290227	-1.14662	down	Biological Process: response to hypoxia (GO:0001666);; Molecular Function: oxygen transporter activity (GO:0005344);; Molecular Function: iron ion binding (GO:0005506);; Cellular Component: plasma membrane (GO:0005886);; Biological Process: response to auxin (GO:0009733);; Biological Process: oxygen transport (GO:0015671);; Molecular Function: oxygen binding (GO:0019825);; Molecular Function: hem…	--
RSG00511	0.879668	1.00765	1.17342	1.31553	1.36544	1.23397	1.33775	1.71408	1.27464	0.512142	0.368075	normal	0.284842	-0.50558	normal	0.847818	-0.116055	normal	Molecular Function: DNA binding (GO:0003677);; Molecular Function: DNA-directed DNA polymerase activity (GO:0003887);; Molecular Function: ATP binding (GO:0005524);; Cellular Component: nucleus (GO:0005634);; Biological Process: DNA replication (GO:0006260);; Biological Process: DNA recombination (GO:0006310);; Molecular Function: ATP-dependent helicase activity (GO:0008026);; Biological Process:…	K02349|0|brp:103850574|helicase and polymerase-containing protein TEBICHI; K02349 DNA polymerase theta [EC:2.7.7.7] (A)
RSG00512	1.89263	3.80149	2.31972	1.79988	1.81517	1.63618	2.52433	1.90923	2.545	0.475771	-0.602171	normal	0.836477	0.180469	normal	0.632472	-0.405877	normal	Molecular Function: protein serine/threonine kinase activity (GO:0004674);; Molecular Function: protein tyrosine kinase activity (GO:0004713);; Molecular Function: ATP binding (GO:0005524);; Cellular Component: plasma membrane (GO:0005886);; Biological Process: protein phosphorylation (GO:0006468);;	--
RSG00513	0	0	0	0	0	0	0	0	0	--	--	--	--	--	--	--	--	--	--	--
RSG00514	173.36	173.332	209.934	83.1482	56.5114	116.87	70.4566	84.6087	54.4921	0.000176623	-1.11692	down	8.08926e-07	1.42515	up	0.553064	0.328113	normal	Biological Process: mitotic G2 phase (GO:0000085);; Molecular Function: nucleotide binding (GO:0000166);; Biological Process: endonucleolytic cleavage involved in rRNA processing (GO:0000478);; Molecular Function: RNA binding (GO:0003723);; Cellular Component: cell wall (GO:0005618);; Cellular Component: nucleoplasm (GO:0005654);; Cellular Component: cytosol (GO:0005829);; Biological Process: mRN…	K11090|0|brp:103850538|la protein 1; K11090 lupus La protein (A)
RSG00515	1.09739	1.60212	1.39658	2.50449	1.60405	2.38205	2.58905	3.05788	2.51562	0.267715	0.688957	normal	0.0556883	-1.00784	normal	0.620353	-0.301417	normal	Biological Process: cytokinesis by cell plate formation (GO:0000911);; Molecular Function: DNA binding (GO:0003677);; Molecular Function: chromatin binding (GO:0003682);; Molecular Function: sequence-specific DNA binding transcription factor activity (GO:0003700);; Molecular Function: transcription coactivator activity (GO:0003713);; Cellular Component: nucleus (GO:0005634);; Biological Process: …	--
RSG00516	0.405214	0.108181	0	0	0.534455	0.717305	0.133476	0.327221	0.45268	--	--	--	--	--	--	--	--	--	Cellular Component: cytoplasm (GO:0005737);;	--
RSG00517	35.5083	43.1879	29.4465	58.4381	47.2926	45.0863	83.0492	68.4016	64.7841	0.108506	0.500224	normal	0.000544356	-0.997443	normal	0.146486	-0.480318	normal	Biological Process: cell morphogenesis (GO:0000902);; Cellular Component: Golgi stack (GO:0005795);; Cellular Component: cytosol (GO:0005829);; Cellular Component: plasma membrane (GO:0005886);; Biological Process: protein N-linked glycosylation (GO:0006487);; Biological Process: protein targeting to vacuole (GO:0006623);; Biological Process: intra-Golgi vesicle-mediated transport (GO:0006891);; …	--
RSG00518	0	0	0	0	0	0	0	0	0	--	--	--	--	--	--	--	--	--	--	--
RSG00519	0.82916	2.02546	1.42271	1.1064	0.9132	1.0412	0.960778	0.964483	0.472096	0.676293	-0.466924	normal	0.304758	0.87311	normal	0.698291	0.427738	normal	Biological Process: signal transduction (GO:0007165);; Molecular Function: phosphatidylinositol binding (GO:0035091);;	--
RSG00520	3.18342	1.29422	1.0663	2.02684	1.69274	1.15855	0.71674	0.691929	0.99626	0.920184	-0.211252	normal	--	--	--	0.381921	1.04368	normal	Molecular Function: DNA binding (GO:0003677);; Molecular Function: sequence-specific DNA binding transcription factor activity (GO:0003700);; Cellular Component: nucleus (GO:0005634);; Biological Process: regulation of transcription, DNA-templated (GO:0006355);;	K09286|2.75789e-137|brp:103850433|ethylene-responsive transcription factor ERF043; K09286 EREBP-like factor (A)
RSG00521	8.48811	12.5517	12.0549	9.73586	9.87668	9.71351	10.037	12.6336	11.3449	0.784454	-0.153999	normal	0.37918	0.370422	normal	0.626551	0.234906	normal	Biological Process: protein peptidyl-prolyl isomerization (GO:0000413);; Molecular Function: peptidyl-prolyl cis-trans isomerase activity (GO:0003755);; Cellular Component: nucleus (GO:0005634);; Biological Process: protein folding (GO:0006457);; Biological Process: protein targeting to vacuole (GO:0006623);; Biological Process: response to heat (GO:0009408);; Cellular Component: plasmodesma (GO:…	K12737|1.85683e-35|brp:103850099|peptidyl-prolyl cis-trans isomerase CYP57; K12737 peptidyl-prolyl cis-trans isomerase SDCCAG10 [EC:5.2.1.8] (A)
RSG00522	0.286607	0.26189	0.12163	0.196979	0.208881	0.312513	0.248356	0.469045	0.441044	--	--	--	--	--	--	--	--	--	Cellular Component: chloroplast stroma (GO:0009570);; Biological Process: response to auxin (GO:0009733);; Biological Process: cell wall modification involved in abscission (GO:0009830);; Biological Process: auxin metabolic process (GO:0009850);; Biological Process: auxin polar transport (GO:0009926);; Biological Process: leaf morphogenesis (GO:0009965);; Biological Process: secondary shoot forma…	K17913|0|brp:103850421|carotenoid cleavage dioxygenase 8, chloroplastic; K17913 carlactone synthase / all-trans-10'-apo-beta-carotenal 13,14-cleaving dioxygenase [EC:1.13.11.69 1.13.11.70] (A)
RSG00523	3.53685	4.0086	3.79621	2.9089	2.53437	2.50125	2.47786	2.21477	3.12599	0.192992	-0.508371	normal	0.158729	0.536678	normal	0.94347	0.0431492	normal	Cellular Component: nucleus (GO:0005634);;	K17613|0|brp:103850416|uncharacterized LOC103850416; K17613 calcineurin-binding protein cabin-1 (A)
RSG00524	0.423254	2.35949	1.44192	1.33612	2.94577	1.41614	0.568705	0.273041	0.926038	0.515212	0.846548	normal	0.473868	0.8724	normal	0.109756	1.73338	normal	Biological Process: mitotic cell cycle (GO:0000278);; Molecular Function: ATP binding (GO:0005524);; Cellular Component: nucleolus (GO:0005730);; Cellular Component: spindle (GO:0005819);; Cellular Component: microtubule (GO:0005874);; Biological Process: chromatin silencing (GO:0006342);; Cellular Component: cell plate (GO:0009504);; Molecular Function: histone kinase activity (H3-S10 specific) …	K08850|0|brp:103850407|serine/threonine-protein kinase Aurora-1; K08850 aurora kinase, other [EC:2.7.11.1] (A)
RSG00525	3.80516	5.80393	4.80501	6.73379	6.88218	4.85527	11.712	14.5253	12.2099	0.488198	0.370785	normal	6.27621e-05	-1.43123	down	0.00341067	-1.04038	down	Molecular Function: 6-phosphofructokinase activity (GO:0003872);; Molecular Function: ATP binding (GO:0005524);; Cellular Component: 6-phosphofructokinase complex (GO:0005945);; Biological Process: fructose 6-phosphate metabolic process (GO:0006002);; Biological Process: glycolytic process (GO:0006096);; Biological Process: phosphorylation (GO:0016310);;	K00850|0|brp:103850396|ATP-dependent 6-phosphofructokinase 6; K00850 6-phosphofructokinase 1 [EC:2.7.1.11] (A)
RSG00526	20.2898	21.743	19.2367	24.0425	27.9052	20.4589	34.9315	25.8825	31.0406	0.535996	0.239867	normal	0.0663512	-0.556344	normal	0.409003	-0.298617	normal	--	K14376|0|brp:103850374|poly(A) polymerase PAPalpha; K14376 poly(A) polymerase [EC:2.7.7.19] (A)
RSG00527	0.714632	1.47761	0.323236	0.5975	0.664447	1.30488	1.15154	1.2204	1.22407	--	--	--	--	--	--	--	--	--	Cellular Component: nucleus (GO:0005634);; Biological Process: cytokinin biosynthetic process (GO:0009691);;	--
RSG00528	0.854368	5.66069	3.74787	0.804182	5.59734	3.80004	6.07777	6.68668	9.34815	1	0.00617024	normal	0.159378	-1.12329	normal	0.170572	-1.09194	normal	Cellular Component: nucleus (GO:0005634);;	--
RSG00529	19.7704	18.7413	15.275	15.8745	14.2842	17.8563	7.34881	6.5009	6.83861	0.736773	-0.154316	normal	1.08938e-05	1.33637	up	0.000128768	1.19916	up	Molecular Function: sequence-specific DNA binding transcription factor activity (GO:0003700);; Cellular Component: nucleus (GO:0005634);; Biological Process: regulation of transcription, DNA-templated (GO:0006355);; Biological Process: sister chromatid cohesion (GO:0007062);; Biological Process: cell adhesion (GO:0007155);; Biological Process: positive regulation of cell proliferation (GO:0008284…	K09338|0|brp:103850318|homeobox-leucine zipper protein ATHB-8; K09338 homeobox-leucine zipper protein (A)
RSG00530	2.21306	4.48013	4.19794	3.0523	1.81321	2.19907	4.28936	2.9636	3.46038	0.504925	-0.632088	normal	1	-0.0119099	normal	0.446844	-0.631685	normal	Molecular Function: sequence-specific DNA binding transcription factor activity (GO:0003700);; Cellular Component: nucleus (GO:0005634);; Biological Process: circadian rhythm (GO:0007623);; Molecular Function: zinc ion binding (GO:0008270);; Biological Process: response to light stimulus (GO:0009416);; Molecular Function: sequence-specific DNA binding (GO:0043565);; Biological Process: positive r…	--
RSG00531	67.4785	48.5966	79.0704	42.3651	29.6141	34.0695	22.3283	30.2572	38.5024	0.0456905	-0.952269	normal	0.0134378	1.19308	normal	0.728348	0.25326	normal	Molecular Function: aminoacyl-tRNA hydrolase activity (GO:0004045);; Cellular Component: chloroplast (GO:0009507);;	K04794|8.99544e-131|brp:103850298|peptidyl-tRNA hydrolase 2, mitochondrial; K04794 peptidyl-tRNA hydrolase, PTH2 family [EC:3.1.1.29] (A)
RSG00532	14.5305	15.5132	17.8433	10.6614	8.42145	9.10413	10.2439	12.2028	10.2825	0.0121696	-0.768989	normal	0.0706268	0.587142	normal	0.719204	-0.163286	normal	Biological Process: mitotic G2 phase (GO:0000085);; Molecular Function: protein binding (GO:0005515);; Cellular Component: nuclear envelope (GO:0005635);; Biological Process: mRNA export from nucleus (GO:0006406);; Biological Process: photomorphogenesis (GO:0009640);; Biological Process: embryo development ending in seed dormancy (GO:0009793);; Biological Process: seed germination (GO:0009845);; …	K14304|0|brp:103850288|nuclear pore complex protein Nup85; K14304 nuclear pore complex protein Nup85 (A)
RSG00533	4.18829	5.03438	4.22878	7.93676	6.19666	9.41173	3.94624	6.40159	3.65896	0.00727827	0.809595	normal	0.989251	-0.0123583	normal	0.01951	0.819798	normal	Cellular Component: vacuole (GO:0005773);; Biological Process: protein glycosylation (GO:0006486);; Cellular Component: chloroplast (GO:0009507);;	--
RSG00534	47.4026	48.0124	52.1985	50.7946	56.9966	55.0113	36.1889	39.7083	39.2837	0.737156	0.152503	normal	0.293405	0.355902	normal	0.118302	0.527935	normal	--	--
RSG00535	30.2791	58.5584	28.429	48.7992	52.5496	55.5429	198.897	204.021	209.016	0.365905	0.470101	normal	9.89498e-17	-2.40299	down	8.78342e-12	-1.91405	down	Cellular Component: lytic vacuole (GO:0000323);; Molecular Function: cysteine-type endopeptidase activity (GO:0004197);; Cellular Component: extracellular region (GO:0005576);; Biological Process: proteolysis (GO:0006508);; Biological Process: vacuolar protein processing (GO:0006624);; Biological Process: membrane fusion (GO:0006944);; Biological Process: Golgi vesicle transport (GO:0048193);;	K01369|0|brp:103850260|vacuolar-processing enzyme gamma-isozyme; K01369 legumain [EC:3.4.22.34] (A)
RSG00536	0	0	0	0	0	0	0	0	0	--	--	--	--	--	--	--	--	--	--	--
RSG00537	0	0	0	0	0	0	0	0	0	--	--	--	--	--	--	--	--	--	--	--
RSG00538	0.682851	0	0.349448	0.318249	0.0927744	0.193597	0.522213	0.214406	0.289797	--	--	--	--	--	--	--	--	--	Biological Process: sulfur amino acid metabolic process (GO:0000096);; Molecular Function: sequence-specific DNA binding transcription factor activity (GO:0003700);; Molecular Function: protein binding (GO:0005515);; Cellular Component: extracellular region (GO:0005576);; Cellular Component: nucleus (GO:0005634);; Biological Process: glycine catabolic process (GO:0006546);; Biological Process: un…	--
RSG00539	11.9042	10.9272	11.6062	18.9269	19.8316	24.7044	24.862	22.2917	18.9768	0.0169819	0.861441	normal	0.0128374	-0.922069	normal	0.945335	-0.0417499	normal	Biological Process: polysaccharide biosynthetic process (GO:0000271);; Molecular Function: calcium ion binding (GO:0005509);; Molecular Function: protein binding (GO:0005515);; Cellular Component: plasma membrane (GO:0005886);; Cellular Component: chloroplast (GO:0009507);; Cellular Component: plant-type vacuole membrane (GO:0009705);; Biological Process: multidimensional cell growth (GO:0009825)…	K06268|8.53185e-110|brp:103850162|calcineurin B-like protein 10; K06268 serine/threonine-protein phosphatase 2B regulatory subunit (A)
RSG00540	245.101	179.91	256.312	121.374	148.686	156.424	67.8106	60.0446	76.5134	0.0524709	-0.663664	normal	1.40328e-07	1.72941	up	0.000380477	1.08381	up	Biological Process: maltose metabolic process (GO:0000023);; Molecular Function: glycine dehydrogenase (decarboxylating) activity (GO:0004375);; Molecular Function: protein binding (GO:0005515);; Molecular Function: ATP binding (GO:0005524);; Cellular Component: mitochondrion (GO:0005739);; Cellular Component: glycine cleavage complex (GO:0005960);; Biological Process: pentose-phosphate shunt (GO…	K00281|0|brp:103850153|glycine dehydrogenase (decarboxylating) 1, mitochondrial; K00281 glycine dehydrogenase [EC:1.4.4.2] (A)
RSG00541	0	0.169409	0.22177	0.209462	0.444538	0.16153	0	0	0.126795	--	--	--	--	--	--	--	--	--	Molecular Function: zinc ion transmembrane transporter activity (GO:0005385);; Cellular Component: chloroplast (GO:0009507);; Biological Process: response to zinc ion (GO:0010043);; Cellular Component: integral component of membrane (GO:0016021);; Biological Process: zinc ion transmembrane transport (GO:0071577);;	K14709|0|brp:103850142|zinc transporter 9; K14709 solute carrier family 39 (zinc transporter), member 1/2/3 (A)
RSG00542	12.1506	8.04917	17.3224	3.68278	4.75205	5.06265	7.1906	7.07747	10.1944	0.0113649	-1.43022	normal	0.255821	0.554726	normal	0.0528847	-0.857969	normal	Molecular Function: nucleotide binding (GO:0000166);; Molecular Function: sulfotransferase activity (GO:0008146);; Molecular Function: zinc ion binding (GO:0008270);; Cellular Component: chloroplast stroma (GO:0009570);; Biological Process: cellular response to phosphate starvation (GO:0016036);; Biological Process: galactolipid biosynthetic process (GO:0019375);; Biological Process: sulfolipid b…	K06118|0|brp:103850131|UDP-sulfoquinovose synthase, chloroplastic; K06118 UDP-sulfoquinovose synthase [EC:3.13.1.1] (A)
RSG00543	19.3435	27.9253	17.0926	44.0334	31.6013	26.6721	53.184	31.3847	32.3161	0.285933	0.705375	normal	0.111933	-0.913929	normal	0.792078	-0.194671	normal	Cellular Component: cytoplasm (GO:0005737);; Molecular Function: electron carrier activity (GO:0009055);; Molecular Function: protein disulfide oxidoreductase activity (GO:0015035);; Biological Process: cell redox homeostasis (GO:0045454);; Biological Process: anther development (GO:0048653);;	K03676|7.15917e-78|eus:EUTSA_v10026405mg|hypothetical protein; K03676 glutaredoxin 3 (A)
RSG00544	0.784139	4.84878	0.462371	3.4656	3.65546	4.01396	3.92162	6.36634	4.06118	0.467173	0.905736	normal	0.165241	-1.27477	normal	0.574846	-0.34636	normal	Biological Process: MAPK cascade (GO:0000165);; Biological Process: response to molecule of bacterial origin (GO:0002237);; Biological Process: respiratory burst involved in defense response (GO:0002679);; Molecular Function: calmodulin binding (GO:0005516);; Cellular Component: nucleus (GO:0005634);; Cellular Component: cytoplasm (GO:0005737);; Biological Process: tryptophan catabolic process (G…	--
RSG00546	31.8984	25.357	33.23	24.9776	23.6989	23.1016	44.6046	40.5338	42.9584	0.439713	-0.289107	normal	0.10626	-0.498142	normal	0.0122283	-0.769709	normal	Molecular Function: protein serine/threonine kinase activity (GO:0004674);; Molecular Function: ATP binding (GO:0005524);; Cellular Component: nucleus (GO:0005634);; Biological Process: protein phosphorylation (GO:0006468);;	--
RSG00547	34.7318	36.0867	40.1153	24.0736	23.8666	26.0716	25.0958	28.5872	22.1081	0.0560336	-0.575546	normal	0.0615556	0.564937	normal	0.995182	0.0100664	normal	Molecular Function: aminopeptidase activity (GO:0004177);; Cellular Component: nucleus (GO:0005634);; Cellular Component: cytosol (GO:0005829);; Cellular Component: plasma membrane (GO:0005886);; Biological Process: gluconeogenesis (GO:0006094);; Biological Process: cytoskeleton organization (GO:0007010);; Molecular Function: metallopeptidase activity (GO:0008237);; Molecular Function: zinc ion b…	K08776|0|brp:103850079|aminopeptidase M1; K08776 puromycin-sensitive aminopeptidase [EC:3.4.11.-] (A)
RSG00548	0	0	0	0	0	0	0	0	0	--	--	--	--	--	--	--	--	--	Cellular Component: nucleus (GO:0005634);;	K17968|1.34864e-43|brp:103850045|uncharacterized protein At4g33100; K17968 TRIAP1/MDM35 family protein (A)
RSG00549	0.147266	0.732774	0.27757	0.211767	1.75237	0.10462	0.0962902	0.244828	0	--	--	--	--	--	--	--	--	--	Cellular Component: vacuolar membrane (GO:0005774);; Cellular Component: plasma membrane (GO:0005886);; Biological Process: lipid biosynthetic process (GO:0008610);; Molecular Function: (S)-coclaurine-N-methyltransferase activity (GO:0030794);; Biological Process: methylation (GO:0032259);;	--
RSG00550	0	0	0	0	0	0.0726325	0	0	0	--	--	--	--	--	--	--	--	--	Molecular Function: binding (GO:0005488);;	--
RSG00551	0	0	0	0	0	0	0	0	0	--	--	--	--	--	--	--	--	--	Molecular Function: nucleotide binding (GO:0000166);; Biological Process: cytokinesis by cell plate formation (GO:0000911);; Molecular Function: microtubule motor activity (GO:0003777);; Cellular Component: nucleus (GO:0005634);; Cellular Component: microtubule associated complex (GO:0005875);; Biological Process: cell proliferation (GO:0008283);; Cellular Component: plasmodesma (GO:0009506);;	K10395|1.98882e-151|eus:EUTSA_v10003526mg|hypothetical protein; K10395 kinesin family member 4/21/27 (A)
RSG00552	1.72599	3.50967	1.83521	1.7017	2.5314	1.32259	4.82996	3.00763	4.20787	0.806408	-0.345685	normal	0.247936	-0.856146	normal	0.105752	-1.18405	normal	Cellular Component: nucleus (GO:0005634);; Cellular Component: mitochondrion (GO:0005739);;	--
RSG00553	12.1709	12.687	9.98734	10.5149	9.99863	11.1872	9.39523	8.12151	9.49579	0.868118	-0.129545	normal	0.513753	0.357858	normal	0.690114	0.245095	normal	--	--
RSG00554	4.01356	5.42014	1.91962	15.3868	13.5675	13.7065	21.3794	20.773	16.6022	1.26768e-12	1.94301	up	5.16668e-16	-2.38394	down	0.219636	-0.422079	normal	Molecular Function: nucleotide binding (GO:0000166);; Molecular Function: saccharopine dehydrogenase (NADP, L-glutamate-forming) activity (GO:0004755);; Cellular Component: mitochondrion (GO:0005739);; Cellular Component: cytosol (GO:0005829);; Biological Process: response to sucrose (GO:0009744);; Biological Process: response to fructose (GO:0009750);; Biological Process: vegetative to reproduct…	K14157|0|brp:103849713|alpha-aminoadipic semialdehyde synthase; K14157 alpha-aminoadipic semialdehyde synthase [EC:1.5.1.8 1.5.1.9] (A)
RSG00555	1.69024	2.3481	5.02296	2.19575	1.86455	1.61	1.06786	1.52524	0.979061	0.546419	-0.665492	normal	0.144695	1.35937	normal	0.505253	0.71542	normal	Molecular Function: ubiquitin-protein transferase activity (GO:0004842);; Cellular Component: nucleus (GO:0005634);; Biological Process: ubiquitin-dependent protein catabolic process (GO:0006511);; Biological Process: protein ubiquitination (GO:0016567);;	--
RSG00556	0.668489	0.655241	0.643048	0.247485	0.0795654	0.405324	0.239409	0.490321	0.30761	0.153077	-1.44992	normal	0.294096	0.951036	normal	0.72742	-0.479041	normal	Cellular Component: mitochondrion (GO:0005739);;	--
RSG00557	0	0	0	0	0	0	0	0	0	--	--	--	--	--	--	--	--	--	--	--
RSG00558	0.803905	0.741974	1.01909	0.779026	0.620144	1.06918	0.463697	0.461571	0.738245	1	-0.01587	normal	0.563226	0.642224	normal	0.584006	0.640038	normal	--	--
RSG00559	2.24426	2.23719	1.37651	3.61423	3.1034	2.99178	7.19819	6.58958	4.98785	0.383441	0.737532	normal	0.00523626	-1.62575	down	0.135509	-0.869203	normal	Molecular Function: TFIIB-class transcription factor binding (GO:0001093);; Molecular Function: double-stranded DNA binding (GO:0003690);; Cellular Component: nucleus (GO:0005634);; Biological Process: transcription, DNA-templated (GO:0006351);; Biological Process: embryo development ending in seed dormancy (GO:0009793);; Biological Process: pollen germination (GO:0009846);; Biological Process: s…	--
RSG00560	7.16577	6.31371	6.74248	5.87516	6.35259	7.53698	6.25154	7.96809	6.88605	0.983601	-0.0190742	normal	0.890092	-0.062977	normal	0.902855	-0.0612896	normal	Molecular Function: motor activity (GO:0003774);; Molecular Function: actin binding (GO:0003779);; Molecular Function: ATP binding (GO:0005524);; Cellular Component: nucleus (GO:0005634);; Biological Process: protein import into nucleus (GO:0006606);; Cellular Component: myosin complex (GO:0016459);; Biological Process: actin filament-based movement (GO:0030048);; Biological Process: Golgi locali…	K10357|0|brp:103849301|myosin-15; K10357 myosin V (A)
RSG00561	11.8457	12.2336	10.4583	16.2387	12.2493	12.4821	22.1291	16.6269	18.7968	0.500237	0.269619	normal	0.0144629	-0.736102	normal	0.190219	-0.451344	normal	Biological Process: nuclear-transcribed mRNA catabolic process (GO:0000956);; Molecular Function: ubiquitin-protein transferase activity (GO:0004842);; Cellular Component: cytoplasm (GO:0005737);; Biological Process: ubiquitin-dependent protein catabolic process (GO:0006511);; Biological Process: auxin homeostasis (GO:0010252);; Biological Process: protein ubiquitination (GO:0016567);; Biological…	--
RSG00562	7.50993	9.35856	5.65184	5.63841	3.24058	2.03723	7.17338	4.14407	6.85762	0.0777705	-1.01268	normal	0.588854	0.285729	normal	0.254132	-0.717983	normal	Molecular Function: enzyme inhibitor activity (GO:0004857);; Cellular Component: extracellular region (GO:0005576);; Cellular Component: plant-type cell wall (GO:0009505);; Molecular Function: pectinesterase activity (GO:0030599);; Biological Process: cell wall modification (GO:0042545);; Biological Process: negative regulation of catalytic activity (GO:0043086);; Molecular Function: aspartyl est…	K01051|0|brp:103848597|probable pectinesterase/pectinesterase inhibitor 44; K01051 pectinesterase [EC:3.1.1.11] (A)
RSG00563	7.84912	8.45337	7.24664	6.28995	5.51627	6.34489	6.87837	7.71194	6.96491	0.345228	-0.347426	normal	0.719062	0.139702	normal	0.649941	-0.189003	normal	Molecular Function: 1-phosphatidylinositol-3-phosphate 5-kinase activity (GO:0000285);; Molecular Function: ATP binding (GO:0005524);; Cellular Component: endosome (GO:0005768);; Biological Process: vacuole organization (GO:0007033);; Molecular Function: zinc ion binding (GO:0008270);; Biological Process: pollen development (GO:0009555);; Biological Process: organ morphogenesis (GO:0009887);; Bio…	K00921|0|brp:103848812|1-phosphatidylinositol-3-phosphate 5-kinase FAB1A; K00921 1-phosphatidylinositol-3-phosphate 5-kinase [EC:2.7.1.150] (A)
RSG00564	101.525	101.551	86.4584	75.2137	59.9322	81.6503	57.8179	74.4521	58.9206	0.291161	-0.38604	normal	0.091425	0.560813	normal	0.659561	0.194201	normal	Biological Process: formation of translation preinitiation complex (GO:0001731);; Molecular Function: translation initiation factor activity (GO:0003743);; Cellular Component: nucleus (GO:0005634);; Cellular Component: cytosol (GO:0005829);; Cellular Component: eukaryotic translation initiation factor 3 complex (GO:0005852);; Biological Process: rRNA processing (GO:0006364);; Biological Process: …	K15028|1.00777e-158|eus:EUTSA_v10026154mg|hypothetical protein; K15028 translation initiation factor 3 subunit K (A)
RSG00565	0.801788	3.22735	1.69316	3.16917	4.81257	3.22152	1.743	2.05096	2.11812	0.13511	1.01352	normal	0.959846	-0.0670958	normal	0.117418	0.967282	normal	Molecular Function: signal transducer activity (GO:0004871);; Molecular Function: protein binding (GO:0005515);; Cellular Component: cytoplasm (GO:0005737);; Cellular Component: heterotrimeric G-protein complex (GO:0005834);; Biological Process: signal transduction (GO:0007165);; Cellular Component: mitotic checkpoint complex (GO:0033597);;	K03363|0|brp:103848411|cell division cycle 20.1, cofactor of APC complex-like; K03363 cell division cycle 20, cofactor of APC complex (A)
RSG00566	5.30266	4.62609	4.14294	5.30429	2.83762	2.60259	5.62986	6.58401	4.37431	0.523886	-0.379279	normal	0.641853	-0.227199	normal	0.210019	-0.589829	normal	Biological Process: protein targeting to membrane (GO:0006612);; Biological Process: positive regulation of flavonoid biosynthetic process (GO:0009963);; Biological Process: regulation of plant-type hypersensitive response (GO:0010363);; Biological Process: negative regulation of defense response (GO:0031348);; Biological Process: defense response to bacterium (GO:0042742);; Molecular Function: A…	--
RSG00568	1.19592	1.85912	1.12767	0.996726	1.18288	1.32336	0.290342	0.313942	0.241748	0.85129	-0.24853	normal	0.00777689	2.34259	up	0.0215764	2.11631	normal	Cellular Component: Golgi apparatus (GO:0005794);; Biological Process: starch metabolic process (GO:0005982);; Biological Process: plant-type secondary cell wall biogenesis (GO:0009834);; Biological Process: meristem initiation (GO:0010014);; Biological Process: xylem development (GO:0010089);; Biological Process: glucuronoxylan biosynthetic process (GO:0010417);; Molecular Function: glucuronoxyl…	--
RSG00569	20.4965	15.0215	25.5158	19.8617	16.7954	19.3923	12.7593	11.9266	9.11859	0.896922	-0.101973	normal	0.0968381	0.824311	normal	0.149486	0.741129	normal	Cellular Component: chloroplast inner membrane (GO:0009706);;	--
RSG00570	1.35102	1.40475	1.52083	0.927917	1.02066	0.785395	0.782071	0.944251	1.08949	0.28745	-0.644731	normal	0.282021	0.615299	normal	1	-0.0114415	normal	Molecular Function: protein binding (GO:0005515);; Cellular Component: cytosol (GO:0005829);; Cellular Component: plasma membrane (GO:0005886);; Biological Process: plant-type cell wall modification (GO:0009827);; Biological Process: pollen tube growth (GO:0009860);; Biological Process: chloroplast avoidance movement (GO:0009903);; Biological Process: chloroplast accumulation movement (GO:0009904…	--
RSG00571	4.28787	4.09732	3.73228	1.35431	2.81561	1.57422	0.426578	0.56279	0.40575	0.0206921	-1.09994	normal	3.04568e-09	3.20376	up	0.00459218	2.1308	up	Biological Process: mitotic G2 phase (GO:0000085);; Cellular Component: nucleus (GO:0005634);; Cellular Component: cytosol (GO:0005829);; Cellular Component: plasma membrane (GO:0005886);; Biological Process: regulation of DNA replication (GO:0006275);; Biological Process: DNA methylation (GO:0006306);; Biological Process: chromatin silencing (GO:0006342);; Biological Process: cell proliferation …	--
RSG00572	11.0694	9.29318	10.0562	4.97962	5.56721	6.10902	5.93203	6.0787	7.86174	0.103408	-0.861231	normal	0.244031	0.622891	normal	0.773674	-0.220811	normal	Molecular Function: aspartic-type endopeptidase activity (GO:0004190);; Cellular Component: endosome (GO:0005768);; Cellular Component: Golgi apparatus (GO:0005794);; Cellular Component: trans-Golgi network (GO:0005802);; Cellular Component: plasma membrane (GO:0005886);; Cellular Component: integral component of membrane (GO:0016021);;	K09598|0|eus:EUTSA_v10025502mg|hypothetical protein; K09598 signal peptide peptidase-like 3 [EC:3.4.23.-] (A)
RSG00573	9.27612	15.8441	9.09129	20.507	26.0342	27.5436	26.6141	32.3637	24.0985	0.00161165	1.12514	up	0.000418152	-1.29613	down	0.755645	-0.148553	normal	Molecular Function: peroxidase activity (GO:0004601);; Cellular Component: extracellular region (GO:0005576);; Biological Process: polyamine catabolic process (GO:0006598);; Biological Process: response to oxidative stress (GO:0006979);; Biological Process: phenylpropanoid metabolic process (GO:0009698);; Biological Process: response to nitrate (GO:0010167);; Biological Process: nitrate transport…	K00430|0|brp:103847421|peroxidase 47; K00430 peroxidase [EC:1.11.1.7] (A)
RSG00574	21.7067	24.3951	21.2447	28.4104	27.0606	24.7468	34.652	38.4897	27.0054	0.530007	0.252321	normal	0.079053	-0.54768	normal	0.458622	-0.27463	normal	Biological Process: defense response to oomycetes (GO:0002229);; Biological Process: respiratory burst involved in defense response (GO:0002679);; Molecular Function: protein serine/threonine kinase activity (GO:0004674);; Molecular Function: ATP binding (GO:0005524);; Cellular Component: endosome (GO:0005768);; Cellular Component: plasma membrane (GO:0005886);; Biological Process: protein phosph…	K13416|0|brp:103847328|LRRII5; BRASSINOSTEROID INSENSITIVE 1-associated receptor kinase 1; K13416 brassinosteroid insensitive 1-associated receptor kinase 1 [EC:2.7.10.1 2.7.11.1] (A)
RSG00575	1.20571	1.05947	0.634066	1.96338	1.08426	0.945782	0.749041	0.608719	1.27432	0.667898	0.51482	normal	0.93922	0.121923	normal	0.48922	0.644675	normal	Molecular Function: polygalacturonase activity (GO:0004650);; Cellular Component: extracellular region (GO:0005576);; Biological Process: carbohydrate metabolic process (GO:0005975);;	--
RSG00576	0	0	0	0	0	0	0	0	0	--	--	--	--	--	--	--	--	--	Molecular Function: DNA binding (GO:0003677);; Molecular Function: chromatin binding (GO:0003682);; Molecular Function: sequence-specific DNA binding transcription factor activity (GO:0003700);; Cellular Component: nucleus (GO:0005634);; Biological Process: positive regulation of transcription, DNA-templated (GO:0045893);; Biological Process: regulation of secondary cell wall biogenesis (GO:20006…	K09422|5.98814e-160|brp:103847130|transcriptional activator Myb; K09422 myb proto-oncogene protein, plant (A)
RSG00577	9.09644	7.36521	13.2714	7.61252	6.66012	6.25042	7.15209	6.36153	7.1421	0.306994	-0.521009	normal	0.184673	0.604598	normal	0.884911	0.100532	normal	Molecular Function: transporter activity (GO:0005215);; Molecular Function: ATP binding (GO:0005524);; Biological Process: ATP catabolic process (GO:0006200);; Biological Process: transport (GO:0006810);; Biological Process: embryo development ending in seed dormancy (GO:0009793);; Cellular Component: chloroplast envelope (GO:0009941);; Molecular Function: ATPase activity (GO:0016887);;	--
RSG00578	4.72908	2.53711	5.91043	3.24981	5.11251	4.82488	5.05375	3.98624	8.58125	0.978258	0.0437933	normal	0.549639	-0.431431	normal	0.608446	-0.372136	normal	Biological Process: maltose metabolic process (GO:0000023);; Molecular Function: histone deacetylase activity (GO:0004407);; Cellular Component: nucleus (GO:0005634);; Cellular Component: cytosol (GO:0005829);; Biological Process: pentose-phosphate shunt (GO:0006098);; Cellular Component: chloroplast (GO:0009507);; Biological Process: thylakoid membrane organization (GO:0010027);; Biological Proc…	--
RSG00579	29.0956	22.3754	40.2741	24.1963	20.0725	26.9799	9.13975	12.5873	12.0211	0.564985	-0.277267	normal	0.000376416	1.36373	up	0.00467536	1.10469	up	Cellular Component: chloroplast (GO:0009507);; Biological Process: photosystem II assembly (GO:0010207);;	--
RSG00580	13.7742	10.371	16.4877	21.0337	19.3106	18.6996	11.5766	9.47374	12.9088	0.144571	0.558005	normal	0.596429	0.24641	normal	0.024981	0.819586	normal	Molecular Function: aspartic-type endopeptidase activity (GO:0004190);; Cellular Component: extracellular region (GO:0005576);; Biological Process: proteolysis (GO:0006508);;	--
RSG00581	3.18373	3.32536	2.80525	4.19323	2.80587	2.59947	2.94683	2.91578	2.80438	0.994376	0.0331715	normal	0.913956	0.113702	normal	0.870759	0.162108	normal	Biological Process: maltose metabolic process (GO:0000023);; Molecular Function: protein serine/threonine phosphatase activity (GO:0004722);; Biological Process: negative regulation of cell proliferation (GO:0008285);; Cellular Component: chloroplast (GO:0009507);; Biological Process: response to blue light (GO:0009637);; Biological Process: lateral root morphogenesis (GO:0010102);; Biological Pr…	--
RSG00582	0.936097	0.412378	1.22946	1.1683	0.766726	1.26807	1.12445	0.951099	1.39993	0.800305	0.301762	normal	0.635569	-0.409132	normal	0.943168	-0.0944159	normal	Biological Process: maltose metabolic process (GO:0000023);; Molecular Function: protein serine/threonine phosphatase activity (GO:0004722);; Cellular Component: chloroplast (GO:0009507);; Biological Process: response to blue light (GO:0009637);; Biological Process: regulation of proton transport (GO:0010155);; Biological Process: starch biosynthetic process (GO:0019252);; Biological Process: pos…	--
RSG00583	55.542	38.6289	53.1825	50.7041	37.3051	58.1879	39.1265	40.7897	37.7587	1	0.00331445	normal	0.274713	0.352586	normal	0.28252	0.373384	normal	Molecular Function: 3-deoxy-7-phosphoheptulonate synthase activity (GO:0003849);; Molecular Function: protein binding (GO:0005515);; Biological Process: aromatic amino acid family biosynthetic process (GO:0009073);; Biological Process: chorismate biosynthetic process (GO:0009423);; Cellular Component: chloroplast thylakoid (GO:0009534);;	K01626|0|eus:EUTSA_v10024959mg|hypothetical protein; K01626 3-deoxy-7-phosphoheptulonate synthase [EC:2.5.1.54] (A)
RSG00584	8.38863	8.14264	11.6778	4.42232	3.59601	4.53958	6.25773	9.76643	7.13251	0.000229827	-1.16046	down	0.389668	0.320865	normal	0.0232431	-0.818884	normal	Molecular Function: ATP binding (GO:0005524);; Cellular Component: vacuolar membrane (GO:0005774);; Cellular Component: cytosol (GO:0005829);; Cellular Component: proteasome core complex (GO:0005839);; Cellular Component: plasma membrane (GO:0005886);; Biological Process: ubiquitin-dependent protein catabolic process (GO:0006511);; Biological Process: ATP biosynthetic process (GO:0006754);; Molec…	K01533|0|brp:103846231|copper-transporting ATPase PAA1, chloroplastic; K01533 Cu2+exporting ATPase [EC:3.6.3.4] (A)
RSG00585	6.82978	6.62038	7.54931	4.78938	5.4311	3.74667	5.56997	5.04899	7.15401	0.129098	-0.601047	normal	0.52522	0.273102	normal	0.507947	-0.31125	normal	Cellular Component: vacuolar membrane (GO:0005774);; Cellular Component: plasma membrane (GO:0005886);; Biological Process: glucose catabolic process (GO:0006007);; Molecular Function: potassium ion transmembrane transporter activity (GO:0015079);; Biological Process: cysteine biosynthetic process (GO:0019344);; Biological Process: potassium ion transmembrane transport (GO:0071805);;	--
RSG00586	19.0783	17.2475	20.7781	24.5424	23.8425	22.3593	38.5693	46.3349	32.9924	0.386313	0.320169	normal	0.000364066	-1.01705	down	0.0299115	-0.675714	normal	Biological Process: metabolic process (GO:0008152);; Molecular Function: hydrolase activity (GO:0016787);; Biological Process: response to arsenic-containing substance (GO:0046685);;	--
RSG00587	0	0	0	0	0	0.558477	0.499713	0.421105	1.28029	--	--	--	--	--	--	--	--	--	--	--
RSG00588	3.62155	3.22008	3.21739	1.9469	1.23705	1.36424	4.51008	3.09321	3.56297	0.0274244	-1.14344	normal	0.775707	-0.171731	normal	0.00894778	-1.30196	down	Cellular Component: nucleus (GO:0005634);; Biological Process: proteolysis (GO:0006508);; Biological Process: protein desumoylation (GO:0016926);; Molecular Function: SUMO-specific protease activity (GO:0016929);;	K08596|0|brp:103845672|probable ubiquitin-like-specific protease 2A; K08596 sentrin-specific protease 7 [EC:3.4.22.68] (A)
RSG00589	2.08591	2.67225	2.79887	2.57035	2.74908	1.83967	7.53422	5.82421	8.13898	0.996826	-0.0695132	normal	0.0603117	-1.50599	normal	0.0499259	-1.55945	normal	Cellular Component: nucleus (GO:0005634);; Cellular Component: vacuolar membrane (GO:0005774);;	--
RSG00590	210.756	250.375	206.526	269.197	265.161	207.653	338.549	241.634	220.355	0.60762	0.2306	normal	0.48835	-0.264551	normal	0.983733	-0.0165884	normal	Cellular Component: cytoplasm (GO:0005737);; Biological Process: Golgi organization (GO:0007030);; Biological Process: vacuole organization (GO:0007033);;	--
RSG00591	22.5062	22.9109	20.6854	20.0846	16.6867	20.3383	27.5869	26.6145	23.025	0.631833	-0.203151	normal	0.522379	-0.224017	normal	0.239474	-0.40895	normal	Biological Process: mitochondrial fission (GO:0000266);; Molecular Function: GTPase activity (GO:0003924);; Molecular Function: GTP binding (GO:0005525);; Cellular Component: mitochondrion (GO:0005739);; Cellular Component: peroxisome (GO:0005777);; Cellular Component: cytosol (GO:0005829);; Biological Process: GTP catabolic process (GO:0006184);; Biological Process: protein targeting to mitochon…	K17065|0|brp:103845417|dynamin-related protein 3A; K17065 dynamin 1-like protein [EC:3.6.5.5] (A)
RSG00592	0.0587014	0.0618553	0.147506	0.144365	0.538466	0.165588	0.378014	0.184991	0.189655	--	--	--	--	--	--	--	--	--	--	--
RSG00593	5.67479	21.715	13.3548	17.0389	3.89988	6.96551	67.1127	13.3717	32.8058	--	--	--	--	--	--	--	--	--	--	--
RSG00594	38.187	43.1539	66.6701	44.5413	27.2174	69.6954	75.9828	60.109	125.794	0.93192	0.177491	normal	0.212068	-1.02806	normal	0.320183	-0.840687	normal	--	--
RSG00595	2.81996	1.24816	5.61783	1.57091	2.45711	0.498573	2.56833	2.35435	4.52776	0.492863	-1.1242	normal	0.99866	0.0259705	normal	0.276897	-1.08149	normal	Molecular Function: aldo-keto reductase (NADP) activity (GO:0004033);; Cellular Component: cytosol (GO:0005829);; Molecular Function: L-galactose dehydrogenase activity (GO:0010349);; Biological Process: L-ascorbic acid biosynthetic process (GO:0019853);;	K17744|3.18595e-154|eus:EUTSA_v10025723mg|hypothetical protein; K17744 L-galactose dehydrogenase [EC:1.1.1.316] (A)
RSG00596	19.1124	21.2519	23.4571	11.8864	10.1867	19.6378	7.20582	12.2977	5.93445	0.126214	-0.580109	normal	0.000248054	1.29606	up	0.246553	0.740443	normal	Molecular Function: copper ion binding (GO:0005507);; Cellular Component: Golgi apparatus (GO:0005794);; Cellular Component: cytosol (GO:0005829);; Biological Process: methylation-dependent chromatin silencing (GO:0006346);; Biological Process: cell-cell signaling (GO:0007267);; Biological Process: lysine biosynthetic process via diaminopimelate (GO:0009089);; Cellular Component: chloroplast stro…	K10206|0|brp:103834462|LL-diaminopimelate aminotransferase, chloroplastic; K10206 LL-diaminopimelate aminotransferase [EC:2.6.1.83] (A)
RSG00597	6.03066	7.8165	7.77467	7.03295	7.85432	6.78067	17.2175	14.1067	12.3299	1	0.00891185	normal	0.0209157	-0.909883	normal	0.024348	-0.882017	normal	Molecular Function: protein binding (GO:0005515);; Cellular Component: chloroplast (GO:0009507);;	--
RSG00598	13.339	11.1432	11.4725	13.677	12.8782	13.0241	12.4133	14.678	11.1508	0.798667	0.139387	normal	0.958161	-0.0314719	normal	0.800865	0.128575	normal	Cellular Component: plasma membrane (GO:0005886);; Molecular Function: adenyl nucleotide binding (GO:0030554);;	K16302|0|brp:103845161|DUF21 domain-containing protein At4g33700; K16302 metal transporter CNNM (A)
RSG00599	0.716144	0.180472	0	0	8.78976	0.980225	0.227762	17.4713	5.8904	--	--	--	0.0943198	-5.16769	normal	0.650647	-1.18241	normal	Cellular Component: extracellular region (GO:0005576);;	K13449|8.34297e-106|brp:103844852|pathogenesis-related protein 1; K13449 pathogenesis-related protein 1 (A)
RSG00600	0	0	0.301138	0.273345	0	0	0	0	0	--	--	--	--	--	--	--	--	--	Cellular Component: extracellular region (GO:0005576);; Biological Process: trichoblast differentiation (GO:0010054);;	K13449|2.09852e-110|brp:103844765|pathogenesis-related protein 1; K13449 pathogenesis-related protein 1 (A)
RSG00601	4.41471	3.93449	3.72807	4.17553	5.44259	4.81086	14.7509	12.6692	14.0522	0.679217	0.293956	normal	2.29831e-06	-1.80963	down	5.07502e-05	-1.49677	down	Biological Process: RNA splicing, via endonucleolytic cleavage and ligation (GO:0000394);; Cellular Component: endosome (GO:0005768);; Cellular Component: Golgi apparatus (GO:0005794);; Cellular Component: trans-Golgi network (GO:0005802);; Biological Process: methionine biosynthetic process (GO:0009086);;	--
RSG00602	0	0	0	0	0	0	0	0	0	--	--	--	--	--	--	--	--	--	--	--
RSG00603	19.6165	15.3002	26.2892	13.2075	11.1945	14.3729	8.44372	9.03373	9.97618	0.142225	-0.660573	normal	0.00374523	1.16426	up	0.179311	0.520626	normal	Molecular Function: nucleic acid binding (GO:0003676);; Molecular Function: aminoacyl-tRNA ligase activity (GO:0004812);; Molecular Function: ATP binding (GO:0005524);; Cellular Component: mitochondrion (GO:0005739);; Biological Process: rRNA processing (GO:0006364);; Biological Process: tRNA aminoacylation for protein translation (GO:0006418);; Cellular Component: chloroplast (GO:0009507);; Biol…	K01876|0|brp:103844519|aspartate--tRNA ligase, mitochondrial; K01876 aspartyl-tRNA synthetase [EC:6.1.1.12] (A)
RSG00604	5.14669	9.9201	5.32596	5.06693	8.17813	8.03779	5.01483	5.44747	3.82134	0.946411	0.0704556	normal	0.3392	0.525722	normal	0.214059	0.620255	normal	Molecular Function: magnesium ion binding (GO:0000287);; Molecular Function: ATP binding (GO:0005524);; Cellular Component: extracellular region (GO:0005576);; Cellular Component: intracellular (GO:0005622);; Biological Process: phosphorylation (GO:0016310);; Biological Process: inositol trisphosphate metabolic process (GO:0032957);; Molecular Function: inositol tetrakisphosphate 1-kinase activit…	K00913|0|brp:103844358|inositol-tetrakisphosphate 1-kinase 3; K00913 inositol-1,3,4-trisphosphate 5/6-kinase / inositol-tetrakisphosphate 1-kinase [EC:2.7.1.159 2.7.1.134] (A)
RSG00605	0	0	0	0	0	0	0	0	0	--	--	--	--	--	--	--	--	--	Cellular Component: chloroplast (GO:0009507);;	--
RSG00606	0.191851	0.781388	0.403685	2.15576	4.1423	3.60816	0.198541	0.0764965	0.395437	4.79499e-06	3.56261	up	--	--	--	9.19245e-07	4.06542	up	Molecular Function: nucleotide binding (GO:0000166);; Cellular Component: endoplasmic reticulum (GO:0005783);; Biological Process: microsporogenesis (GO:0009556);; Biological Process: wax biosynthetic process (GO:0010025);; Molecular Function: oxidoreductase activity, acting on the CH-CH group of donors (GO:0016627);; Biological Process: oxidation-reduction process (GO:0055114);; Molecular Functi…	K13356|0|brp:103844166|fatty acyl-CoA reductase 3; K13356 fatty acyl-CoA reductase [EC:1.2.1.-] (A)
RSG00608	0	0	0	0	0	0	0.237386	0.194156	0	--	--	--	--	--	--	--	--	--	Cellular Component: nucleus (GO:0005634);;	--
RSG00609	0.183684	0.574504	1.23937	0.52716	0.65013	0.688119	0.471227	0.257238	0.132578	--	--	--	--	--	--	--	--	--	Molecular Function: peroxidase activity (GO:0004601);; Molecular Function: binding (GO:0005488);; Cellular Component: extracellular region (GO:0005576);;	--
RSG00610	0	0.236291	0.212228	0	0.072558	0	0	0	0	--	--	--	--	--	--	--	--	--	Molecular Function: DNA binding (GO:0003677);; Molecular Function: sequence-specific DNA binding transcription factor activity (GO:0003700);; Cellular Component: nucleus (GO:0005634);; Biological Process: regulation of transcription, DNA-templated (GO:0006355);; Biological Process: response to auxin (GO:0009733);; Biological Process: cell growth (GO:0016049);; Molecular Function: protein dimeriza…	--
RSG00611	59.9693	74.9925	80.0084	14.8915	9.75234	20.1833	17.2082	14.3125	10.1113	0.597731	-0.415252	normal	0.43467	0.518499	normal	0.906722	0.121253	normal	Molecular Function: structural constituent of ribosome (GO:0003735);; Biological Process: translation (GO:0006412);; Cellular Component: cytosolic small ribosomal subunit (GO:0022627);;	K02980|1.681e-34|brp:103834454|40S ribosomal protein S29-like; K02980 small subunit ribosomal protein S29e (A)
RSG00612	2.14049	3.86476	8.49497	1.12379	2.07663	2.0778	2.34144	3.31766	2.95241	--	--	--	--	--	--	--	--	--	Biological Process: double-strand break repair via homologous recombination (GO:0000724);; Cellular Component: nucleus (GO:0005634);; Biological Process: defense response to bacterium (GO:0042742);; Molecular Function: transcription regulatory region DNA binding (GO:0044212);;	--
RSG00613	13.2302	11.1867	13.8592	13.9309	15.6125	10.8509	14.2395	17.7363	11.6427	0.889658	0.101613	normal	0.796048	-0.144186	normal	0.982058	-0.0199363	normal	Biological Process: response to superoxide (GO:0000303);; Biological Process: respiratory burst involved in defense response (GO:0002679);; Cellular Component: nucleus (GO:0005634);; Molecular Function: zinc ion binding (GO:0008270);; Biological Process: response to salt stress (GO:0009651);; Biological Process: response to auxin (GO:0009733);; Biological Process: response to abscisic acid (GO:00…	K15707|2.81525e-123|brp:103843481|E3 ubiquitin-protein ligase RNF170; K15707 RING finger protein 170 (A)
RSG00614	1.33186	1.37908	1.18866	1.07187	1.6675	1.11115	1.11477	1.51543	1.96755	0.98495	-0.0609745	normal	0.816441	-0.227834	normal	0.791613	-0.267677	normal	Molecular Function: protein binding (GO:0005515);; Cellular Component: nucleus (GO:0005634);; Molecular Function: zinc ion binding (GO:0008270);;	--
RSG00615	76.8348	60.4953	87.8886	37.5357	39.2222	35.3946	22.024	13.9196	18.0669	0.000334067	-0.984386	normal	1.78953e-11	2.05064	up	0.00079721	1.08245	up	Molecular Function: protein tyrosine kinase activity (GO:0004713);; Molecular Function: protein binding (GO:0005515);; Molecular Function: ATP binding (GO:0005524);; Cellular Component: nucleus (GO:0005634);; Cellular Component: cytosol (GO:0005829);; Biological Process: sucrose metabolic process (GO:0005985);; Biological Process: protein phosphorylation (GO:0006468);; Biological Process: unsatur…	K14498|0|aly:ARALYDRAFT_491280|hypothetical protein; K14498 serine/threonine-protein kinase SRK2 [EC:2.7.11.1] (A)
RSG00616	168.842	147.696	258.553	128.815	184.549	53.9127	20.074	26.3634	20.6687	0.693046	-0.436224	normal	0.000556235	3.07419	up	0.00553494	2.65826	up	Cellular Component: mitochondrion (GO:0005739);;	--
RSG00617	0.670124	1.01762	0.963578	1.37845	1.07556	0.376987	1.13813	0.554777	0.579685	0.968527	0.0940316	normal	0.890092	0.178451	normal	0.806325	0.28625	normal	Molecular Function: structural constituent of cell wall (GO:0005199);; Cellular Component: nucleus (GO:0005634);;	--
RSG00618	0	0	0	0	0	0	0	0	0.197257	--	--	--	--	--	--	--	--	--	Biological Process: response to karrikin (GO:0080167);;	--
RSG00619	16.5849	18.5665	20.1082	13.1757	18.0117	13.0368	13.5161	14.2359	21.2721	0.498185	-0.287239	normal	0.615062	0.200062	normal	0.909247	-0.0694941	normal	Biological Process: response to superoxide (GO:0000303);; Molecular Function: sequence-specific DNA binding transcription factor activity (GO:0003700);; Cellular Component: nucleus (GO:0005634);; Biological Process: cell death (GO:0008219);; Biological Process: response to water deprivation (GO:0009414);; Biological Process: response to salt stress (GO:0009651);; Biological Process: abscisic acid…	K14432|0|brp:103842661|ABSCISIC ACID-INSENSITIVE 5-like protein 6; K14432 ABA responsive element binding factor (A)
RSG00620	7.42862	7.72047	11.6124	7.14051	5.94813	6.38231	3.88761	2.25425	3.6585	0.395549	-0.440949	normal	0.00146009	1.45633	up	0.0401311	1.02854	normal	Cellular Component: chloroplast (GO:0009507);; Biological Process: chloroplast organization (GO:0009658);;	--
RSG00621	79.6311	113.275	69.6567	64.9778	77.9469	92.3258	19.5873	21.0178	27.3034	0.861883	-0.103284	normal	1.06995e-06	1.89924	up	3.45261e-09	1.81342	up	Cellular Component: nucleus (GO:0005634);; Cellular Component: cytosol (GO:0005829);; Biological Process: polyamine catabolic process (GO:0006598);; Biological Process: response to wounding (GO:0009611);; Biological Process: coumarin biosynthetic process (GO:0009805);; Biological Process: positive regulation of flavonoid biosynthetic process (GO:0009963);; Biological Process: cysteine biosyntheti…	K00588|3.21057e-180|brp:103862317|caffeoyl-CoA O-methyltransferase 1; K00588 caffeoyl-CoA O-methyltransferase [EC:2.1.1.104] (A)
RSG00622	27.1299	24.8097	22.8414	25.3183	19.5813	23.7117	43.6375	42.2528	33.6123	0.791886	-0.122261	normal	0.0337348	-0.668918	normal	0.0120919	-0.772916	normal	Molecular Function: ubiquitin-protein transferase activity (GO:0004842);; Molecular Function: zinc ion binding (GO:0008270);; Biological Process: isoprenoid biosynthetic process (GO:0008299);; Biological Process: response to water deprivation (GO:0009414);; Biological Process: wax biosynthetic process (GO:0010025);; Biological Process: cutin biosynthetic process (GO:0010143);; Biological Process:…	K10661|0|brp:103842338|probable E3 ubiquitin ligase SUD1; K10661 E3 ubiquitin-protein ligase MARCH6 [EC:6.3.2.19] (A)
RSG00623	0	0	0	0	0	0	0	0	0	--	--	--	--	--	--	--	--	--	Cellular Component: chloroplast stroma (GO:0009570);; Molecular Function: adenyl nucleotide binding (GO:0030554);; Biological Process: hydrogen peroxide catabolic process (GO:0042744);; Biological Process: cell redox homeostasis (GO:0045454);;	--
RSG00624	0.0407886	0.130474	0.0503403	0	0.107882	0.174059	0	0.0430679	0	--	--	--	--	--	--	--	--	--	Molecular Function: abscisic acid glucosyltransferase activity (GO:0010294);; Molecular Function: flavonol 3-O-glucosyltransferase activity (GO:0047893);; Biological Process: flavonol biosynthetic process (GO:0051555);; Biological Process: response to other organism (GO:0051707);; Molecular Function: quercetin 3-O-glucosyltransferase activity (GO:0080043);; Molecular Function: quercetin 7-O-gluco…	--
RSG00625	1.08705	2.32391	0.709649	1.36341	1.82796	2.95562	1.1333	7.60785	1.63936	0.544363	0.635647	normal	0.48159	-1.36641	normal	0.71242	-0.694523	normal	Biological Process: metabolic process (GO:0008152);; Molecular Function: abscisic acid glucosyltransferase activity (GO:0010294);; Biological Process: response to other organism (GO:0051707);; Molecular Function: quercetin 3-O-glucosyltransferase activity (GO:0080043);;	--
RSG00626	28.8014	26.0605	22.2784	56.89	50.505	52.8213	51.0475	57.043	43.4773	4.36278e-05	1.0883	up	0.000796927	-0.96277	normal	0.72752	0.145322	normal	Biological Process: metabolic process (GO:0008152);; Cellular Component: chloroplast (GO:0009507);; Molecular Function: abscisic acid glucosyltransferase activity (GO:0010294);; Molecular Function: quercetin 3-O-glucosyltransferase activity (GO:0080043);; Molecular Function: quercetin 7-O-glucosyltransferase activity (GO:0080044);;	--
RSG00627	51.7364	38.4326	30.0949	42.411	58.414	49.4163	56.183	79.2127	38.2387	0.344497	0.340519	normal	0.0594829	-0.6021	normal	0.523955	-0.237803	normal	Molecular Function: nucleic acid binding (GO:0003676);; Cellular Component: nucleus (GO:0005634);;	--
RSG00629	2.92169	5.09387	6.36284	2.95045	2.59726	3.24455	3.55616	3.12728	4.09307	0.363856	-0.70963	normal	0.601475	0.391867	normal	0.744835	-0.302599	normal	Biological Process: G1/S transition of mitotic cell cycle (GO:0000082);; Biological Process: nuclear division (GO:0000280);; Biological Process: cytokinesis by cell plate formation (GO:0000911);; Molecular Function: protein binding (GO:0005515);; Cellular Component: nucleus (GO:0005634);; Biological Process: regulation of DNA replication (GO:0006275);; Biological Process: response to cytokinin (G…	K14505|0|brp:103841511|cyclin-D3-1; K14505 cyclin D3, plant (A)
RSG00630	0	0	0	0	0	0	0	0.188895	0	--	--	--	--	--	--	--	--	--	Cellular Component: nucleus (GO:0005634);;	--
RSG00631	58.3787	69.2469	62.9096	55.9374	54.2578	47.653	48.7199	44.2239	53.8199	0.515312	-0.250091	normal	0.255301	0.366614	normal	0.746353	0.133112	normal	Cellular Component: plant-type vacuole (GO:0000325);; Biological Process: cell morphogenesis (GO:0000902);; Cellular Component: nucleus (GO:0005634);; Cellular Component: vacuolar membrane (GO:0005774);; Cellular Component: Golgi apparatus (GO:0005794);; Cellular Component: plasma membrane (GO:0005886);; Biological Process: protein glycosylation (GO:0006486);; Biological Process: protein targetin…	K02144|0|brp:103840942|V-type proton ATPase subunit H-like; K02144 V-type H+transporting ATPase subunit H (A)
RSG00632	233.303	169.4	312.252	268.554	288.016	326.905	112.591	123.575	123.235	0.278086	0.382931	normal	0.0061636	0.973329	normal	1.28112e-06	1.37499	up	Molecular Function: DNA binding (GO:0003677);; Molecular Function: sequence-specific DNA binding transcription factor activity (GO:0003700);; Molecular Function: protein binding (GO:0005515);; Cellular Component: nucleus (GO:0005634);; Biological Process: pentose-phosphate shunt (GO:0006098);; Biological Process: rRNA processing (GO:0006364);; Cellular Component: chloroplast thylakoid membrane (G…	--
RSG00633	20.3232	23.4275	19.1406	25.2269	15.5432	19.918	19.5457	30.721	18.3816	0.928777	-0.0529523	normal	0.828549	-0.0974337	normal	0.813744	-0.130475	normal	Molecular Function: phosphoglycerate dehydrogenase activity (GO:0004617);; Molecular Function: ATP binding (GO:0005524);; Cellular Component: mitochondrion (GO:0005739);; Cellular Component: cytosol (GO:0005829);; Biological Process: L-serine biosynthetic process (GO:0006564);; Biological Process: megagametogenesis (GO:0009561);; Cellular Component: chloroplast stroma (GO:0009570);; Cellular Comp…	K00058|0|brp:103840754|D-3-phosphoglycerate dehydrogenase 2, chloroplastic; K00058 D-3-phosphoglycerate dehydrogenase [EC:1.1.1.95] (A)
RSG00634	10.677	12.4798	14.8082	11.593	14.6991	11.1665	18.2443	13.8245	15.5101	1	-0.00870138	normal	0.497873	-0.289362	normal	0.533475	-0.279296	normal	Cellular Component: nucleus (GO:0005634);; Molecular Function: hydrolase activity (GO:0016787);;	--
RSG00635	36.5207	26.9608	40.7833	15.1644	13.1313	12.8084	34.7133	25.1654	30.2795	9.53409e-07	-1.31409	down	0.666867	0.157431	normal	0.000156657	-1.14128	down	Molecular Function: protein serine/threonine kinase activity (GO:0004674);; Molecular Function: protein tyrosine kinase activity (GO:0004713);; Molecular Function: ATP binding (GO:0005524);; Biological Process: protein phosphorylation (GO:0006468);; Biological Process: transmembrane receptor protein tyrosine kinase signaling pathway (GO:0007169);; Cellular Component: integral component of membran…	--
RSG00636	0.832007	1.32373	0.848363	0.553342	3.38361	1.41943	0.396618	0.71993	0.206844	0.643618	0.758427	normal	--	--	--	0.16366	2.32727	normal	Molecular Function: DNA binding (GO:0003677);; Molecular Function: sequence-specific DNA binding transcription factor activity (GO:0003700);; Cellular Component: nucleus (GO:0005634);; Biological Process: regulation of transcription, DNA-templated (GO:0006355);; Biological Process: membrane fusion (GO:0006944);; Molecular Function: transcription factor binding (GO:0008134);; Biological Process: m…	--
RSG00637	4.22862	4.45016	3.60048	3.17477	3.60576	2.43596	2.45905	1.5105	2.02458	0.62768	-0.397574	normal	0.091966	1.08423	normal	0.338538	0.703043	normal	Molecular Function: nucleotide binding (GO:0000166);; Cellular Component: cytosol (GO:0005829);; Biological Process: protein targeting to membrane (GO:0006612);; Molecular Function: zinc ion binding (GO:0008270);; Biological Process: response to wounding (GO:0009611);; Biological Process: coumarin biosynthetic process (GO:0009805);; Biological Process: lignin biosynthetic process (GO:0009809);; B…	K00083|0|brp:103862330|cinnamyl alcohol dehydrogenase 5; K00083 cinnamyl-alcohol dehydrogenase [EC:1.1.1.195] (A)
RSG00638	15.2833	9.46548	14.2208	11.8866	10.7748	12.4157	15.2909	12.441	11.5574	0.821045	-0.122541	normal	0.919942	0.0507953	normal	0.926527	-0.0534159	normal	Molecular Function: 3-chloroallyl aldehyde dehydrogenase activity (GO:0004028);; Molecular Function: aldehyde dehydrogenase (NAD) activity (GO:0004029);; Molecular Function: aldehyde dehydrogenase [NAD(P)] activity (GO:0004030);; Cellular Component: mitochondrion (GO:0005739);; Biological Process: cellular aldehyde metabolic process (GO:0006081);; Biological Process: response to water deprivation…	K00128|0|brp:103840237|aldehyde dehydrogenase family 3 member I1, chloroplastic; K00128 aldehyde dehydrogenase (NAD) [EC:1.2.1.3] (A)
RSG00639	17.0893	18.7069	16.3256	10.8941	13.109	6.62382	56.8777	34.9877	38.9801	0.0131164	-0.755668	normal	0.000353792	-1.31603	down	5.5485e-06	-2.05364	down	Biological Process: metabolic process (GO:0008152);; Molecular Function: 1,2-alpha-L-fucosidase activity (GO:0047513);; Cellular Component: apoplast (GO:0048046);;	K15923|0|brp:103839946|alpha-L-fucosidase 2; K15923 alpha-L-fucosidase 2 [EC:3.2.1.51] (A)
RSG00640	85.6078	65.2643	66.9525	67.2369	43.3807	108.471	18.5458	26.2451	26.2884	0.613761	-0.277933	normal	1.148e-05	1.52201	up	0.0278594	1.26362	normal	Cellular Component: mitochondrion (GO:0005739);; Biological Process: pyrimidine ribonucleotide biosynthetic process (GO:0009220);;	--
RSG00641	16.9039	15.7538	19.3074	16.0411	16.8858	15.9747	13.1787	13.1706	12.3131	0.868118	-0.0944149	normal	0.239098	0.445208	normal	0.366048	0.369514	normal	Cellular Component: cytosol (GO:0005829);;	K17607|0|brp:103839702|TIP41-like protein; K17607 type 2A phosphatase activator TIP41 (A)
RSG00642	46.2878	46.8574	41.6342	50.5698	43.234	50.6338	128.004	100.28	102.679	0.793721	0.129397	normal	9.07733e-06	-1.25603	down	0.000168906	-1.10989	down	Cellular Component: cytoplasm (GO:0005737);; Biological Process: second-messenger-mediated signaling (GO:0019932);; Biological Process: cell redox homeostasis (GO:0045454);;	--
RSG00643	3.11084	3.8858	3.5475	2.73649	4.77782	3.07875	4.30297	4.75761	4.1529	1	-0.0106316	normal	0.574433	-0.299979	normal	0.604114	-0.287247	normal	Molecular Function: nucleotide binding (GO:0000166);; Cellular Component: mitochondrion (GO:0005739);; Cellular Component: Cul4-RING E3 ubiquitin ligase complex (GO:0080008);;	--
RSG00644	427.663	342.017	433.782	267.715	117.05	230.61	120.203	151.864	144.392	0.00293627	-0.940696	normal	7.41823e-08	1.53093	up	0.28133	0.604391	normal	Cellular Component: nucleus (GO:0005634);;	--
RSG00645	7.40275	6.5055	6.15581	5.51366	5.43728	6.05901	5.20349	5.41793	4.90433	0.630535	-0.225712	normal	0.34748	0.360704	normal	0.750873	0.154296	normal	Biological Process: GPI anchor metabolic process (GO:0006505);; Biological Process: intracellular protein transport (GO:0006886);; Molecular Function: hydrolase activity, acting on ester bonds (GO:0016788);; Cellular Component: intrinsic component of endoplasmic reticulum membrane (GO:0031227);;	--
RSG00646	0.0252252	0.0132483	0.0155761	0	0	0.0179118	0.0497342	0.251478	0	--	--	--	--	--	--	--	--	--	--	--
RSG00647	7.91732	7.75837	6.82255	11.6055	10.8262	8.7107	11.3948	10.1827	10.8928	0.343983	0.471505	normal	0.286728	-0.495518	normal	1	-0.0069308	normal	Molecular Function: binding (GO:0005488);; Cellular Component: nucleus (GO:0005634);;	K14649|8.33105e-147|brp:103839025|transcription initiation factor TFIID subunit 8; K14649 transcription initiation factor TFIID subunit 8 (A)
RSG00648	0.599648	0	0	0	0	0	0	0	0	--	--	--	--	--	--	--	--	--	--	--
RSG00649	2.50432	2.45871	2.60073	2.86366	3.93921	2.97894	2.35539	3.05829	2.25516	0.623547	0.400251	normal	1	-0.0129337	normal	0.567489	0.41056	normal	Cellular Component: chloroplast stroma (GO:0009570);; Biological Process: isopentenyl diphosphate biosynthetic process, methylerythritol 4-phosphate pathway (GO:0019288);; Molecular Function: 4-hydroxy-3-methylbut-2-en-1-yl diphosphate synthase activity (GO:0046429);; Biological Process: response to antibiotic (GO:0046677);; Molecular Function: 4-hydroxy-3-methylbut-2-en-1-yl diphosphate reductas…	K03527|0|crb:CARUB_v10004745mg|hypothetical protein; K03527 4-hydroxy-3-methylbut-2-enyl diphosphate reductase [EC:1.17.1.2] (A)
RSG00650	18.2673	18.3109	25.6737	10.8447	7.56807	10.4692	3.48091	7.30709	6.13307	0.0109435	-1.10344	normal	3.77182e-05	1.9014	up	0.181052	0.816977	normal	Cellular Component: Golgi apparatus (GO:0005794);; Molecular Function: methyltransferase activity (GO:0008168);; Biological Process: methylation (GO:0032259);;	--
RSG00651	13.9589	13.1684	11.8343	13.9484	13.9681	14.9686	15.22	15.9304	13.1754	0.804902	0.129166	normal	0.683001	-0.168297	normal	0.976659	-0.01914	normal	Cellular Component: cytoplasm (GO:0005737);; Biological Process: fatty acid beta-oxidation (GO:0006635);; Molecular Function: zinc ion binding (GO:0008270);; Biological Process: hormone-mediated signaling pathway (GO:0009755);; Biological Process: protein import into peroxisome matrix (GO:0016558);;	K11968|0|brp:103838710|probable E3 ubiquitin-protein ligase ARI1; K11968 ariadne-1 (A)
RSG00652	0.131905	0.780297	0.337522	0.0808216	0.304444	0.188266	0.0865711	0.175939	0.181337	--	--	--	--	--	--	--	--	--	Molecular Function: nucleotide binding (GO:0000166);; Cellular Component: nucleus (GO:0005634);; Cellular Component: heterotrimeric G-protein complex (GO:0005834);; Molecular Function: transferase activity (GO:0016740);;	--
RSG00653	4.01805	3.09613	2.60705	3.07337	3.07936	3.60527	7.5608	7.31404	7.5161	0.995114	0.0170558	normal	0.00134812	-1.21364	down	0.00154652	-1.17827	down	Molecular Function: G-protein coupled receptor binding (GO:0001664);; Molecular Function: GTPase activity (GO:0003924);; Molecular Function: signal transducer activity (GO:0004871);; Molecular Function: GTP binding (GO:0005525);; Cellular Component: nucleus (GO:0005634);; Cellular Component: heterotrimeric G-protein complex (GO:0005834);; Biological Process: GTP catabolic process (GO:0006184);; B…	--
RSG00654	0	0	0	0	0	0	0	0	0	--	--	--	--	--	--	--	--	--	Biological Process: respiratory burst involved in defense response (GO:0002679);; Molecular Function: DNA binding (GO:0003677);; Molecular Function: sequence-specific DNA binding transcription factor activity (GO:0003700);; Cellular Component: nucleus (GO:0005634);; Biological Process: regulation of transcription, DNA-templated (GO:0006355);; Biological Process: ethylene biosynthetic process (GO:…	--
RSG00655	4.25199	3.37758	1.63067	1.95985	3.59892	0.942342	0.394561	1.3591	1.02149	--	--	--	--	--	--	--	--	--	Cellular Component: nucleus (GO:0005634);; Cellular Component: cytosol (GO:0005829);;	K15901|1.25915e-52|brp:103838263|EKC/KEOPS complex subunit Tprkb; K15901 EKC/KEOPS complex subunit CGI121/TPRKB (A)
RSG00656	0	0.381878	0	0	0	0	0	0	0	--	--	--	--	--	--	--	--	--	Cellular Component: nucleus (GO:0005634);; Cellular Component: Golgi apparatus (GO:0005794);; Molecular Function: sulfotransferase activity (GO:0008146);;	--
RSG00657	4.23675	5.64639	4.9986	7.69398	4.98436	5.12274	11.8861	10.4586	9.53926	0.563294	0.276623	normal	0.000367335	-1.10327	down	0.012848	-0.811307	normal	Molecular Function: DNA binding (GO:0003677);; Molecular Function: chromatin binding (GO:0003682);; Molecular Function: sequence-specific DNA binding transcription factor activity (GO:0003700);; Cellular Component: nucleus (GO:0005634);; Biological Process: regulation of transcription, DNA-templated (GO:0006355);; Molecular Function: zinc ion binding (GO:0008270);;	K11649|0|brp:103837926|SWI/SNF complex subunit SWI3D-like; K11649 SWI/SNF related-matrix-associated actin-dependent regulator of chromatin subfamily C (A)
RSG00658	0	0	0	0	0	0	0.0456467	0.147612	0.192224	--	--	--	--	--	--	--	--	--	Molecular Function: protein serine/threonine kinase activity (GO:0004674);; Molecular Function: ATP binding (GO:0005524);; Cellular Component: plasma membrane (GO:0005886);; Biological Process: plant-type cell wall modification (GO:0009827);; Biological Process: pollen tube growth (GO:0009860);; Biological Process: protein autophosphorylation (GO:0046777);; Biological Process: regulation of unidi…	--
RSG00659	51.6877	55.4215	50.1788	42.0745	44.6731	36.8375	40.2307	40.0886	38.2287	0.384365	-0.313737	normal	0.207147	0.40648	normal	0.795623	0.112005	normal	Molecular Function: structural molecule activity (GO:0005198);; Cellular Component: nucleus (GO:0005634);; Cellular Component: cytosol (GO:0005829);; Cellular Component: plasma membrane (GO:0005886);; Biological Process: gluconeogenesis (GO:0006094);; Biological Process: protein N-linked glycosylation (GO:0006487);; Biological Process: intracellular protein transport (GO:0006886);; Biological Pro…	K17267|0|brp:103837747|coatomer subunit gamma; K17267 coatomer protein complex, subunit gamma (A)
RSG00660	48.1134	45.5693	41.9755	35.2915	38.4754	41.3234	39.6399	41.2765	33.8644	0.585831	-0.220028	normal	0.483903	0.24058	normal	0.941118	0.0411606	normal	Biological Process: MAPK cascade (GO:0000165);; Molecular Function: nucleotide binding (GO:0000166);; Molecular Function: GTPase activity (GO:0003924);; Molecular Function: protein binding (GO:0005515);; Cellular Component: endoplasmic reticulum (GO:0005783);; Cellular Component: heterotrimeric G-protein complex (GO:0005834);; Biological Process: GTP catabolic process (GO:0006184);; Biological Pr…	K04536|0|brp:103837655|guanine nucleotide-binding protein subunit beta; K04536 guanine nucleotide-binding protein G(I)/G(S)/G(T) subunit beta-1 (A)
RSG00661	7.94832	6.9981	5.73751	7.11562	4.67606	5.77845	10.4118	8.4815	9.8582	0.639602	-0.201325	normal	0.0939238	-0.513092	normal	0.0253479	-0.700362	normal	Molecular Function: metal ion binding (GO:0046872);;	--
RSG00662	20.2203	22.4122	23.6168	16.3053	14.8273	14.0967	19.628	15.3339	17.257	0.0649843	-0.569693	normal	0.268914	0.359868	normal	0.637091	-0.193233	normal	Biological Process: polysaccharide biosynthetic process (GO:0000271);; Molecular Function: actin binding (GO:0003779);; Cellular Component: cytosol (GO:0005829);; Cellular Component: plasma membrane (GO:0005886);; Biological Process: glucose catabolic process (GO:0006007);; Biological Process: multidimensional cell growth (GO:0009825);; Biological Process: cell tip growth (GO:0009932);; Biologica…	K17261|0|brp:103837455|cyclase-associated protein 1; K17261 adenylyl cyclase-associated protein (A)
RSG00663	25.4857	26.0038	20.2601	35.4467	29.0654	29.772	39.4451	30.212	32.7994	0.243989	0.41856	normal	0.115465	-0.518815	normal	0.864132	-0.0845232	normal	Molecular Function: nucleotide binding (GO:0000166);; Cellular Component: cytoplasm (GO:0005737);; Molecular Function: pinoresinol reductase activity (GO:0010283);;	--
RSG00664	0	0	0	0	0	0	0	0	0	--	--	--	--	--	--	--	--	--	--	--
RSG00665	0	0	0	0	0	0	0	0	0	--	--	--	--	--	--	--	--	--	Molecular Function: protein kinase activity (GO:0004672);; Cellular Component: nucleus (GO:0005634);; Cellular Component: peroxisome (GO:0005777);; Biological Process: polyamine catabolic process (GO:0006598);; Molecular Function: primary amine oxidase activity (GO:0008131);; Biological Process: response to wounding (GO:0009611);; Biological Process: coumarin biosynthetic process (GO:0009805);; B…	K17839|1.26156e-34|brp:103852299|probable polyamine oxidase 4; K17839 polyamine oxidase [EC:1.5.3.17 1.5.3.-] (A)
RSG00666	0.153716	0.165756	0.399983	0.761	1.66914	0.850884	0.784042	0.641706	0.644272	--	--	--	--	--	--	--	--	--	Cellular Component: chloroplast (GO:0009507);;	--
RSG00667	14.6218	12.1582	14.313	10.483	8.55903	9.41452	10.5907	10.1724	9.11323	0.194055	-0.523651	normal	0.247777	0.463649	normal	0.952362	-0.0422164	normal	Molecular Function: dihydrofolate reductase activity (GO:0004146);; Molecular Function: thymidylate synthase activity (GO:0004799);; Biological Process: dTMP biosynthetic process (GO:0006231);; Biological Process: glycine biosynthetic process (GO:0006545);; Biological Process: one-carbon metabolic process (GO:0006730);; Biological Process: 10-formyltetrahydrofolate biosynthetic process (GO:000925…	K13998|0|brp:103836808|bifunctional dihydrofolate reductase-thymidylate synthase 2; K13998 dihydrofolate reductase / thymidylate synthase [EC:1.5.1.3 2.1.1.45] (A)
RSG00668	29.2583	27.0089	32.8068	25.1933	19.3641	28.3688	11.0195	11.9065	11.4868	0.53489	-0.273696	normal	9.56019e-05	1.36635	up	0.00222409	1.11003	up	--	--
RSG00669	32.2786	24.8325	31.5029	50.4053	51.8399	53.5378	80.6656	80.1558	72.7126	0.00671307	0.808305	normal	4.54466e-06	-1.31563	down	0.143644	-0.487933	normal	--	--
RSG00670	0.914084	2.42903	1.08018	0.502486	0.684795	0.408085	0.759299	0.816059	0.990716	0.189186	-1.45705	normal	0.302666	0.899091	normal	0.618564	-0.539106	normal	Cellular Component: mitochondrion (GO:0005739);; Biological Process: transport (GO:0006810);; Molecular Function: phosphatidylinositol transporter activity (GO:0008526);; Biological Process: lateral root development (GO:0048527);; Biological Process: root hair cell tip growth (GO:0048768);;	--
RSG00671	0	0	0	0	0	0	0	0	0	--	--	--	--	--	--	--	--	--	--	K07466|0|brp:103854069|replication protein A 70 kDa DNA-binding subunit C-like; K07466 replication factor A1 (A)
RSG00672	0	0	0	0	0	0	0	0	0	--	--	--	--	--	--	--	--	--	--	K07466|0|brp:103854069|replication protein A 70 kDa DNA-binding subunit C-like; K07466 replication factor A1 (A)
RSG00673	0	0	0	0	0	0	0	0	0	--	--	--	--	--	--	--	--	--	Biological Process: telomere maintenance (GO:0000723);; Molecular Function: DNA helicase activity (GO:0003678);; Biological Process: DNA repair (GO:0006281);; Biological Process: DNA duplex unwinding (GO:0032508);;	--
RSG00674	0	0	0	0	0	0	0	0	0	--	--	--	--	--	--	--	--	--	--	--
RSG00675	0	0	0	0	0	0	0	0	0	--	--	--	--	--	--	--	--	--	--	--
RSG00676	0	0	0	0	0	0	0	0	0	--	--	--	--	--	--	--	--	--	--	--
RSG00677	309.956	229.368	454.605	195.384	119.27	169.985	119.921	124.541	137.487	0.0365258	-0.813299	normal	0.000224297	1.16822	up	0.301884	0.368419	normal	Biological Process: endonucleolytic cleavage involved in rRNA processing (GO:0000478);; Biological Process: RNA methylation (GO:0001510);; Molecular Function: nucleic acid binding (GO:0003676);; Cellular Component: nucleolus (GO:0005730);; Cellular Component: mitochondrion (GO:0005739);; Cellular Component: cytosol (GO:0005829);; Biological Process: pyrimidine ribonucleotide biosynthetic process …	K11294|2.54588e-31|brp:103871689|nucleolin 1-like; K11294 nucleolin (A)
RSG00679	32.4896	38.9773	53.9706	60.3574	65.6538	50.4191	40.0744	40.9674	46.3428	0.180404	0.462575	normal	0.910798	-0.0542152	normal	0.233257	0.426943	normal	--	--
RSG00680	1.28322	4.9956	2.45601	0.202844	2.98362	0.646614	2.23454	0.872983	2.05046	0.504631	-1.17384	normal	0.444758	0.791266	normal	0.850925	-0.356069	normal	Molecular Function: farnesyl-diphosphate farnesyltransferase activity (GO:0004310);; Cellular Component: endoplasmic reticulum membrane (GO:0005789);; Cellular Component: plasma membrane (GO:0005886);; Biological Process: acetyl-CoA metabolic process (GO:0006084);; Biological Process: polyamine catabolic process (GO:0006598);; Biological Process: phenylpropanoid metabolic process (GO:0009698);; C…	K00801|0|brp:103836099|squalene synthase; K00801 farnesyl-diphosphate farnesyltransferase [EC:2.5.1.21] (A)
RSG00681	2.12145	3.3552	2.12253	0.586291	0.609723	0.126963	1.5817	1.36748	1.81037	0.00151802	-2.50486	down	0.39955	0.647062	normal	0.0384616	-1.84148	normal	Molecular Function: farnesyl-diphosphate farnesyltransferase activity (GO:0004310);; Cellular Component: endoplasmic reticulum membrane (GO:0005789);; Cellular Component: plasma membrane (GO:0005886);; Biological Process: acetyl-CoA metabolic process (GO:0006084);; Biological Process: polyamine catabolic process (GO:0006598);; Biological Process: phenylpropanoid metabolic process (GO:0009698);; C…	K00801|0|brp:103836007|squalene synthase; K00801 farnesyl-diphosphate farnesyltransferase [EC:2.5.1.21] (A)
RSG00682	15.9313	17.5186	15.4936	16.9133	20.136	14.9032	16.4414	14.8331	12.298	0.931338	0.0544976	normal	0.64634	0.196839	normal	0.525395	0.272068	normal	Cellular Component: cytosol (GO:0005829);; Molecular Function: clathrin binding (GO:0030276);;	--
RSG00683	88.0258	80.4549	105.757	40.9263	42.5343	67.1587	34.6191	52.1992	23.7586	0.0085628	-0.83688	normal	2.5925e-05	1.31874	up	0.363753	0.507395	normal	Biological Process: RNA methylation (GO:0001510);; Molecular Function: structural constituent of ribosome (GO:0003735);; Cellular Component: cell wall (GO:0005618);; Cellular Component: nucleolus (GO:0005730);; Cellular Component: Golgi apparatus (GO:0005794);; Cellular Component: plasma membrane (GO:0005886);; Biological Process: translation (GO:0006412);; Cellular Component: plasmodesma (GO:000…	K02984|1.03277e-173|brp:103835819|40S ribosomal protein S3a-2; K02984 small subunit ribosomal protein S3Ae (A)
RSG00684	103.746	69.1329	137.985	99.6215	77.998	103.823	71.6545	63.732	56.8378	0.997631	0.0112154	normal	0.104473	0.548254	normal	0.0992445	0.577095	normal	Molecular Function: catalytic activity (GO:0003824);; Cellular Component: vacuolar membrane (GO:0005774);; Biological Process: carbohydrate metabolic process (GO:0005975);; Biological Process: ubiquitin-dependent protein catabolic process (GO:0006511);; Biological Process: photorespiration (GO:0009853);; Cellular Component: mitochondrial membrane (GO:0031966);; Cellular Component: respiratory cha…	K03965|8.11089e-82|brp:103835339|NADH dehydrogenase [ubiquinone] 1 beta subcomplex subunit 9-like; K03965 NADH dehydrogenase (ubiquinone) 1 beta subcomplex subunit 9 (A)
RSG00685	0	0	0	0	0	0	0	0	0	--	--	--	--	--	--	--	--	--	Cellular Component: nucleus (GO:0005634);; Biological Process: arginine catabolic process (GO:0006527);; Biological Process: protein targeting to membrane (GO:0006612);; Biological Process: response to oxidative stress (GO:0006979);; Biological Process: spermidine biosynthetic process (GO:0008295);; Molecular Function: arginine decarboxylase activity (GO:0008792);; Biological Process: response to…	K01583|2.70294e-172|crb:CARUB_v10004246mg|hypothetical protein; K01583 arginine decarboxylase [EC:4.1.1.19] (A)
RSG00686	0.0829094	0	0.103823	0	0	0	0	0	0	--	--	--	--	--	--	--	--	--	Cellular Component: nucleus (GO:0005634);; Biological Process: arginine catabolic process (GO:0006527);; Biological Process: protein targeting to membrane (GO:0006612);; Biological Process: response to oxidative stress (GO:0006979);; Biological Process: spermidine biosynthetic process (GO:0008295);; Molecular Function: arginine decarboxylase activity (GO:0008792);; Biological Process: response to…	K01583|0|ath:AT4G34710|ADC2; arginine decarboxylase 2; K01583 arginine decarboxylase [EC:4.1.1.19] (A)
RSG00687	0	0	0	0	0	0	0	0	0	--	--	--	--	--	--	--	--	--	--	--
RSG00688	0	0	0	0	0	0	0	0	0	--	--	--	--	--	--	--	--	--	--	--
RSG00689	0	0	0	0	0	0	0	0	0	--	--	--	--	--	--	--	--	--	Cellular Component: mitochondrion (GO:0005739);;	--
RSG00690	0	0	0	0	0	0	0	0	0	--	--	--	--	--	--	--	--	--	Cellular Component: nucleus (GO:0005634);;	--
RSG00691	10.0242	9.43139	6.96338	10.1516	7.84071	9.39545	13.7523	11.1154	10.1177	0.907733	0.0877217	normal	0.303996	-0.450666	normal	0.45919	-0.346317	normal	Cellular Component: extracellular region (GO:0005576);; Cellular Component: nucleus (GO:0005634);; Biological Process: sister chromatid cohesion (GO:0007062);; Biological Process: synapsis (GO:0007129);; Biological Process: reciprocal meiotic recombination (GO:0007131);; Biological Process: response to gamma radiation (GO:0010332);; Biological Process: chromatin silencing by small RNA (GO:0031048…	K15559|0|brp:103850345|regulation of nuclear pre-mRNA domain-containing protein 1A; K15559 regulator of Ty1 transposition protein 103 (A)
RSG00692	16.3554	11.1544	17.3423	14.224	10.5693	15.8203	6.58123	6.22796	7.11432	0.879309	-0.105379	normal	0.00951157	1.15596	up	0.017486	1.06619	normal	Molecular Function: nucleotide binding (GO:0000166);; Molecular Function: oxidoreductase activity (GO:0016491);; Biological Process: oxidation-reduction process (GO:0055114);;	--
RSG00693	8.3684	8.02136	7.93376	10.1205	9.86013	7.92165	7.72937	7.77518	6.94974	0.652501	0.208074	normal	0.82098	0.103316	normal	0.405086	0.330458	normal	Molecular Function: protein serine/threonine kinase activity (GO:0004674);; Molecular Function: protein tyrosine kinase activity (GO:0004713);; Molecular Function: ATP binding (GO:0005524);; Cellular Component: cytosol (GO:0005829);; Cellular Component: plasma membrane (GO:0005886);; Biological Process: protein phosphorylation (GO:0006468);; Biological Process: microtubule nucleation (GO:0007020)…	--
RSG00694	3.88917	4.63544	5.23638	6.57171	2.99553	5.30909	4.3792	4.48549	5.99479	1	0.012134	normal	0.983987	0.0228102	normal	0.95491	0.0478674	normal	Cellular Component: nucleolus (GO:0005730);; Cellular Component: cytoplasm (GO:0005737);; Biological Process: heat acclimation (GO:0010286);; Cellular Component: chromocenter (GO:0010369);;	--
RSG00695	0	11.5229	1.87546	1.61068	5.37475	0	0	0	1.42416	--	--	--	--	--	--	--	--	--	Cellular Component: mitochondrion (GO:0005739);; Biological Process: response to jasmonic acid (GO:0009753);;	--
RSG00696	0	0.206371	0	0	0	0	0.494736	1.01725	0	--	--	--	--	--	--	--	--	--	Molecular Function: nucleotide binding (GO:0000166);; Molecular Function: DNA-directed RNA polymerase activity (GO:0003899);; Biological Process: transcription, DNA-templated (GO:0006351);;	--
RSG00697	12.1441	9.94459	9.47659	11.7181	8.51392	11.225	19.6349	16.469	10.6723	0.884324	0.115795	normal	0.064487	-0.793265	normal	0.131938	-0.658042	normal	Molecular Function: nucleotide binding (GO:0000166);; Biological Process: RNA splicing, via endonucleolytic cleavage and ligation (GO:0000394);; Molecular Function: DNA-directed RNA polymerase activity (GO:0003899);; Cellular Component: DNA-directed RNA polymerase II, core complex (GO:0005665);; Biological Process: transcription from RNA polymerase II promoter (GO:0006366);;	K03012|1.9573e-18|brp:103828417|DNA-directed RNA polymerase II subunit 4-like; K03012 DNA-directed RNA polymerase II subunit RPB4 (A)
RSG00698	37.8459	39.0267	40.0726	31.3442	28.9807	30.8368	29.1856	27.9708	25.0356	0.321139	-0.349503	normal	0.104764	0.506184	normal	0.671475	0.175173	normal	Biological Process: mitotic G2 phase (GO:0000085);; Cellular Component: nucleus (GO:0005634);; Cellular Component: cytosol (GO:0005829);; Biological Process: gluconeogenesis (GO:0006094);; Biological Process: glycolytic process (GO:0006096);; Biological Process: fatty acid beta-oxidation (GO:0006635);; Cellular Component: proteasome regulatory particle, lid subcomplex (GO:0008541);; Biological Pr…	K03035|0|brp:103850352|26S proteasome non-ATPase regulatory subunit 12 homolog A; K03035 26S proteasome regulatory subunit N5 (A)
RSG00699	0	0	0	0	0.994522	0	0	0.939351	0.829211	--	--	--	--	--	--	--	--	--	--	--
RSG00700	10.1557	8.53396	12.0422	3.93894	3.76746	2.79753	7.60234	7.04213	6.38663	2.87136e-07	-1.54534	down	0.114947	0.548156	normal	0.00743838	-0.978743	normal	Cellular Component: Golgi apparatus (GO:0005794);; Cellular Component: plasma membrane (GO:0005886);; Molecular Function: zinc ion binding (GO:0008270);; Biological Process: plant-type cell wall organization (GO:0009664);; Biological Process: multidimensional cell growth (GO:0009825);; Biological Process: plant-type primary cell wall biogenesis (GO:0009833);; Biological Process: cell tip growth (…	K10999|0|eus:EUTSA_v10012521mg|hypothetical protein; K10999 cellulose synthase A [EC:2.4.1.12] (A)
RSG00701	33.1742	31.5945	28.1159	43.8383	46.2477	49.0304	31.3977	35.6494	31.3683	0.0562254	0.591487	normal	0.949178	-0.0312879	normal	0.0785909	0.580221	normal	Cellular Component: nucleus (GO:0005634);; Cellular Component: cytosol (GO:0005829);; Biological Process: transcription, DNA-templated (GO:0006351);;	--
RSG00702	5.16053	4.84392	7.99323	2.00059	3.20748	3.56989	2.18804	1.70599	3.85042	0.154289	-1.03563	normal	0.0834561	1.19286	normal	0.89015	0.171742	normal	Molecular Function: structural molecule activity (GO:0005198);; Cellular Component: chloroplast (GO:0009507);;	--
RSG00703	381.115	349.049	396.121	279.783	210.759	282.194	439.785	383.658	375.667	0.121748	-0.527759	normal	0.794769	-0.118216	normal	0.0615026	-0.629473	normal	Molecular Function: structural constituent of cytoskeleton (GO:0005200);; Molecular Function: protein binding (GO:0005515);; Molecular Function: ATP binding (GO:0005524);; Cellular Component: cell wall (GO:0005618);; Cellular Component: nucleolus (GO:0005730);; Cellular Component: mitochondrion (GO:0005739);; Cellular Component: cytosol (GO:0005829);; Cellular Component: cytoskeleton (GO:0005856)…	K10355|0|eus:EUTSA_v10013834mg|hypothetical protein; K10355 actin, other eukaryote (A)
RSG00704	3.11424	3.30537	2.19245	8.33229	11.4349	12.177	0.946524	1.6859	5.65242	--	--	--	--	--	--	--	--	--	Biological Process: floral organ abscission (GO:0010227);; Cellular Component: apoplast (GO:0048046);;	--
RSG00705	23.79	21.6382	5.39829	5.60975	7.88296	19.603	7.45465	3.92937	3.73483	0.915424	-0.126584	normal	0.732045	0.272275	normal	0.862841	0.163448	normal	Molecular Function: phosphorelay response regulator activity (GO:0000156);; Biological Process: phosphorelay signal transduction system (GO:0000160);; Molecular Function: DNA binding (GO:0003677);; Cellular Component: nucleus (GO:0005634);; Biological Process: starch metabolic process (GO:0005982);; Biological Process: photomorphogenesis (GO:0009640);; Biological Process: response to red light (G…	K12130|8.96667e-21|aly:ARALYDRAFT_910487|hypothetical protein; K12130 pseudo-response regulator 5 (A)
RSG00706	22.6064	15.22	20.1136	10.718	7.40874	18.3591	13.4092	12.7387	11.945	0.130174	-0.72215	normal	0.215672	0.587746	normal	0.872361	-0.116094	normal	Biological Process: RNA splicing, via endonucleolytic cleavage and ligation (GO:0000394);; Molecular Function: structural constituent of ribosome (GO:0003735);; Cellular Component: ribosome (GO:0005840);; Biological Process: DNA-templated transcription, elongation (GO:0006354);; Biological Process: translation (GO:0006412);; Biological Process: methionine biosynthetic process (GO:0009086);; Cellu…	K02879|1.42264e-110|brp:103855831|50S ribosomal protein L17, chloroplastic-like; K02879 large subunit ribosomal protein L17 (A)
RSG00707	31.4686	28.3119	28.0864	31.4833	17.4175	23.7628	36.2512	22.9122	29.0562	0.656792	-0.193106	normal	0.844575	-0.0797554	normal	0.573773	-0.260329	normal	Molecular Function: enzyme inhibitor activity (GO:0004857);; Cellular Component: plant-type cell wall (GO:0009505);; Cellular Component: chloroplast (GO:0009507);; Biological Process: regulation of meristem growth (GO:0010075);; Molecular Function: pectinesterase activity (GO:0030599);; Biological Process: cell wall modification (GO:0042545);; Biological Process: negative regulation of catalytic …	--
RSG00708	62.8277	50.4398	68.1508	50.2258	46.5543	47.8433	47.1904	35.3061	48.1804	0.375957	-0.315944	normal	0.13533	0.463778	normal	0.682474	0.163133	normal	Molecular Function: enzyme inhibitor activity (GO:0004857);; Cellular Component: plant-type cell wall (GO:0009505);; Cellular Component: chloroplast (GO:0009507);; Biological Process: regulation of meristem growth (GO:0010075);; Molecular Function: pectinesterase activity (GO:0030599);; Biological Process: cell wall modification (GO:0042545);; Biological Process: negative regulation of catalytic …	--
RSG00709	0	0	0	0	0	0	0	0	0	--	--	--	--	--	--	--	--	--	Biological Process: defense response (GO:0006952);; Biological Process: cellular metabolic process (GO:0044237);; Cellular Component: intracellular part (GO:0044424);; Biological Process: single-organism cellular process (GO:0044763);; Biological Process: regulation of cellular process (GO:0050794);;	K01507|1.25771e-30|brp:103855828|soluble inorganic pyrophosphatase 1, chloroplastic; K01507 inorganic pyrophosphatase [EC:3.6.1.1] (A)
RSG00710	0	0	0.452763	0	0	0	0	0.12081	0.122355	--	--	--	--	--	--	--	--	--	Cellular Component: endoplasmic reticulum (GO:0005783);; Cellular Component: plant-type vacuole membrane (GO:0009705);; Biological Process: pollen sperm cell differentiation (GO:0048235);;	--
RSG00711	43.5459	36.5503	61.2728	37.9492	31.5212	36.6799	29.6199	32.6908	31.6181	0.349697	-0.399578	normal	0.0816086	0.590632	normal	0.61991	0.208751	normal	Biological Process: MAPK cascade (GO:0000165);; Molecular Function: magnesium ion binding (GO:0000287);; Molecular Function: inorganic diphosphatase activity (GO:0004427);; Cellular Component: cytosol (GO:0005829);; Biological Process: protein targeting to membrane (GO:0006612);; Biological Process: phosphate-containing compound metabolic process (GO:0006796);; Biological Process: response to col…	K01507|0|brp:103855828|soluble inorganic pyrophosphatase 1, chloroplastic; K01507 inorganic pyrophosphatase [EC:3.6.1.1] (A)
RSG00712	0	0.192014	0	0	0	0	0	0.0627325	0.0647385	--	--	--	--	--	--	--	--	--	--	--
RSG00713	66.7084	61.9391	85.1554	28.2027	25.664	26.0696	56.7485	62.4141	50.7007	9.83091e-08	-1.4161	down	0.298643	0.342814	normal	0.000298236	-1.05394	down	Molecular Function: ATP binding (GO:0005524);; Cellular Component: cell wall (GO:0005618);; Cellular Component: mitochondrial matrix (GO:0005759);; Cellular Component: vacuolar membrane (GO:0005774);; Cellular Component: Golgi apparatus (GO:0005794);; Biological Process: protein folding (GO:0006457);; Biological Process: response to heat (GO:0009408);; Cellular Component: chloroplast (GO:0009507)…	--
RSG00714	0	0	0	0	0	0	0	0	0	--	--	--	--	--	--	--	--	--	Molecular Function: Rab GDP-dissociation inhibitor activity (GO:0005093);; Cellular Component: cytoplasm (GO:0005737);; Biological Process: N-terminal protein myristoylation (GO:0006499);; Biological Process: protein transport (GO:0015031);; Cellular Component: apoplast (GO:0048046);;	K17255|0|brp:103855825|guanosine nucleotide diphosphate dissociation inhibitor At5g09550-like; K17255 Rab GDP dissociation inhibitor (A)
RSG00715	2.87917	19.513	3.86097	9.15157	21.9092	15.0873	0.417695	3.55806	8.1894	0.612626	0.770117	normal	0.589169	1.1375	normal	0.024477	1.9247	normal	--	--
RSG00716	0.191198	0.402637	0.369053	0.818561	2.27306	2.54986	0	0.20414	1.0294	0.0468064	2.81725	normal	--	--	--	0.0518076	2.29507	normal	Biological Process: RNA methylation (GO:0001510);; Molecular Function: RNA binding (GO:0003723);; Molecular Function: structural constituent of ribosome (GO:0003735);; Cellular Component: nucleolus (GO:0005730);; Cellular Component: vacuolar membrane (GO:0005774);; Cellular Component: Golgi apparatus (GO:0005794);; Biological Process: translation (GO:0006412);; Cellular Component: plasmodesma (GO…	K02958|1.44542e-86|brp:103855823|40S ribosomal protein S15-4-like; K02958 small subunit ribosomal protein S15e (A)
RSG00717	0.0758965	0.30155	0.308076	1.05313	0.729944	0.646725	0	0.985325	0.254245	--	--	--	--	--	--	--	--	--	Molecular Function: dicarboxylic acid transmembrane transporter activity (GO:0005310);; Cellular Component: mitochondrial inner membrane (GO:0005743);; Biological Process: dicarboxylic acid transport (GO:0006835);; Biological Process: mitochondrial transport (GO:0006839);; Biological Process: ethylene biosynthetic process (GO:0009693);; Biological Process: proton transport (GO:0015992);; Cellular…	K15104|2.72841e-156|brp:103855820|mitochondrial uncoupling protein 6; K15104 solute carrier family 25 (mitochondrial oxoglutarate transporter), member 11 (A)
RSG00718	0.4553	0	0.0947354	0	0.302626	0.107674	0.60285	1.13044	1.86082	--	--	--	--	--	--	--	--	--	Cellular Component: cytoplasm (GO:0005737);; Biological Process: metabolic process (GO:0008152);; Molecular Function: hydrolase activity (GO:0016787);;	--
RSG00719	5.09347	4.46276	4.16409	5.89211	5.11331	4.90289	9.03113	8.30695	6.55136	0.68496	0.225417	normal	0.0348015	-0.788175	normal	0.165833	-0.543892	normal	Cellular Component: plant-type vacuole (GO:0000325);; Cellular Component: vacuolar membrane (GO:0005774);; Cellular Component: plasma membrane (GO:0005886);; Molecular Function: potassium ion transmembrane transporter activity (GO:0015079);; Biological Process: potassium ion transmembrane transport (GO:0071805);;	--
RSG00720	0	0	0	0	0	0	0	0.323517	0	--	--	--	--	--	--	--	--	--	Cellular Component: nucleus (GO:0005634);;	K06170|9.63655e-75|brp:103855816|probable gamma-secretase subunit PEN-2; K06170 presenilin enhancer 2 (A)
RSG00721	3.70174	13.6895	4.36323	11.7186	14.2027	11.6663	9.79082	6.31714	5.95057	0.29021	0.812678	normal	1	-0.00141549	normal	0.0353315	0.830106	normal	Molecular Function: 3-methyl-2-oxobutanoate dehydrogenase (2-methylpropanoyl-transferring) activity (GO:0003863);; Cellular Component: mitochondrion (GO:0005739);; Biological Process: metabolic process (GO:0008152);;	K00166|0|brp:103855815|2-oxoisovalerate dehydrogenase subunit alpha 2, mitochondrial; K00166 2-oxoisovalerate dehydrogenase E1 component alpha subunit [EC:1.2.4.4] (A)
RSG00722	5.63898	10.5971	6.35958	18.3479	24.4911	32.2231	9.2573	6.20401	12.0181	0.00025151	1.77348	up	0.567262	-0.319761	normal	0.00147454	1.46876	up	Biological Process: amino acid transmembrane transport (GO:0003333);; Cellular Component: integral component of plasma membrane (GO:0005887);; Biological Process: protein targeting to membrane (GO:0006612);; Biological Process: water transport (GO:0006833);; Biological Process: response to salt stress (GO:0009651);; Biological Process: response to fructose (GO:0009750);; Biological Process: posit…	--
RSG00723	28.0453	48.3144	29.9671	35.3861	39.7313	35.6632	67.8615	105.734	101.181	0.902583	0.0751066	normal	0.000128125	-1.37742	down	4.34698e-05	-1.28217	down	Biological Process: response to hypoxia (GO:0001666);; Molecular Function: DNA binding (GO:0003677);; Molecular Function: sequence-specific DNA binding transcription factor activity (GO:0003700);; Cellular Component: nucleus (GO:0005634);; Biological Process: regulation of transcription, DNA-templated (GO:0006355);; Biological Process: multicellular organismal development (GO:0007275);; Biologica…	--
RSG00724	230.808	233.959	278.545	210.179	160.673	234.517	114.347	112.895	106.44	0.450632	-0.298002	normal	0.000163065	1.16552	up	0.00376393	0.884885	normal	Cellular Component: mitochondrial proton-transporting ATP synthase complex, catalytic core F(1) (GO:0000275);; Molecular Function: copper ion binding (GO:0005507);; Molecular Function: ATP binding (GO:0005524);; Biological Process: ATP catabolic process (GO:0006200);; Molecular Function: hydrogen-exporting ATPase activity, phosphorylative mechanism (GO:0008553);; Biological Process: ATP synthesis…	K02133|0|brp:103855812|ATP synthase subunit beta-3, mitochondrial-like; K02133 F-type H+transporting ATPase subunit beta [EC:3.6.3.14] (A)
RSG00725	0	0	0	0	0	0	0	0	0	--	--	--	--	--	--	--	--	--	--	--
RSG00726	0	0	0	0	0	0	0	0	0	--	--	--	--	--	--	--	--	--	--	--
RSG00727	218.869	217.406	248.285	259.044	197.992	230.5	127.242	130.792	127.275	0.989959	0.015513	normal	0.00922733	0.83727	normal	0.00510852	0.869756	normal	--	K02133|0|brp:103855811|ATP synthase subunit beta-2, mitochondrial; K02133 F-type H+transporting ATPase subunit beta [EC:3.6.3.14] (A)
RSG00728	0.349051	0.474671	0.717135	0.367114	1.27904	0.536287	0.493567	0.2929	0.826868	0.719942	0.537603	normal	0.961137	-0.092658	normal	0.733267	0.463795	normal	Cellular Component: nucleus (GO:0005634);;	--
RSG00729	35.0292	27.6238	34.5903	28.9572	28.3347	26.5224	28.8521	26.4251	27.7432	0.602941	-0.223191	normal	0.485966	0.254029	normal	0.928705	0.0481975	normal	Molecular Function: protein serine/threonine kinase activity (GO:0004674);; Molecular Function: protein binding (GO:0005515);; Molecular Function: ATP binding (GO:0005524);; Cellular Component: nucleus (GO:0005634);; Biological Process: protein phosphorylation (GO:0006468);; Biological Process: response to salt stress (GO:0009651);;	K14498|0|brp:103855807|serine/threonine-protein kinase SRK2G; K14498 serine/threonine-protein kinase SRK2 [EC:2.7.11.1] (A)
RSG00730	20.7104	14.3132	21.2007	10.2811	11.9576	12.1184	11.6797	12.5792	11.8332	0.0410759	-0.689033	normal	0.0717867	0.626898	normal	0.945813	-0.0419356	normal	Molecular Function: calcium ion binding (GO:0005509);; Cellular Component: endoplasmic reticulum (GO:0005783);; Cellular Component: Golgi apparatus (GO:0005794);; Cellular Component: plasma membrane (GO:0005886);; Biological Process: signal transduction (GO:0007165);; Biological Process: regulation of flower development (GO:0009909);; Biological Process: histone lysine methylation (GO:0034968);;	--
RSG00731	76.5946	109.727	112.434	164.798	136.819	120.038	56.0681	72.3903	48.9658	0.0202012	0.703061	normal	0.0927359	0.672844	normal	1.00835e-06	1.39655	up	Biological Process: maltose metabolic process (GO:0000023);; Molecular Function: magnesium ion binding (GO:0000287);; Molecular Function: pyruvate kinase activity (GO:0004743);; Cellular Component: cytosol (GO:0005829);; Cellular Component: plasma membrane (GO:0005886);; Biological Process: glycolytic process (GO:0006096);; Biological Process: phosphorylation (GO:0016310);; Biological Process: st…	K00873|0|brp:103855804|pyruvate kinase, cytosolic isozyme-like; K00873 pyruvate kinase [EC:2.7.1.40] (A)
RSG00733	8.3776	12.0782	9.1337	9.40897	10.3575	10.4483	8.44925	9.3849	6.23832	0.917032	0.0567203	normal	0.393414	0.287074	normal	0.301769	0.36581	normal	Biological Process: microtubule cytoskeleton organization (GO:0000226);; Biological Process: cytokinesis by cell plate formation (GO:0000911);; Cellular Component: nucleus (GO:0005634);; Cellular Component: plasmodesma (GO:0009506);; Biological Process: gravitropism (GO:0009630);;	--
RSG00734	1.43099	1.42087	1.71777	2.97686	3.84415	2.55705	2.31787	1.41137	3.71044	0.0804521	0.992274	normal	0.354041	-0.662367	normal	0.606409	0.342461	normal	Molecular Function: nucleic acid binding (GO:0003676);; Molecular Function: catalytic activity (GO:0003824);; Biological Process: DNA metabolic process (GO:0006259);;	--
RSG00735	2.24662	2.96199	2.12218	2.09707	3.21422	3.32646	3.50947	3.75114	3.04473	0.703027	0.221812	normal	0.285416	-0.463257	normal	0.657693	-0.218408	normal	Molecular Function: ATP binding (GO:0005524);; Biological Process: defense response (GO:0006952);; Biological Process: signal transduction (GO:0007165);; Molecular Function: nucleoside-triphosphatase activity (GO:0017111);; Molecular Function: ADP binding (GO:0043531);;	--
RSG00736	0.172913	0.240858	0.0886978	0.211935	0.340307	0.530605	0.0488445	0.0586937	0.0814247	0.438265	1.09841	normal	--	--	--	0.015916	2.82316	normal	Biological Process: single-multicellular organism process (GO:0044707);;	--
RSG00737	21.1742	35.0978	26.3475	33.6692	34.7394	38.3557	20.3309	23.5768	19.8061	0.262834	0.380866	normal	0.279097	0.355702	normal	0.0143584	0.757377	normal	Molecular Function: nucleotide binding (GO:0000166);; Cellular Component: cytoplasm (GO:0005737);; Biological Process: sister chromatid cohesion (GO:0007062);; Biological Process: reciprocal meiotic recombination (GO:0007131);; Biological Process: gravitropism (GO:0009630);; Biological Process: organ morphogenesis (GO:0009887);; Biological Process: tissue development (GO:0009888);; Biological Pro…	--
RSG00738	0	0	0	0	0	0	0.113075	0.0918757	0.187789	--	--	--	--	--	--	--	--	--	Cellular Component: nucleus (GO:0005634);; Cellular Component: cytosol (GO:0005829);; Biological Process: fatty acid beta-oxidation (GO:0006635);; Biological Process: positive regulation of cell proliferation (GO:0008284);; Cellular Component: phragmoplast (GO:0009524);; Biological Process: protein import into peroxisome matrix (GO:0016558);; Molecular Function: translation repressor activity (GO…	K13211|4.22964e-40|brp:103847169|PAX3- and PAX7-binding protein 1; K13211 GC-rich sequence DNA-binding factor (A)
RSG00739	0	0	0	0	0	0	0	0	0	--	--	--	--	--	--	--	--	--	Cellular Component: chloroplast thylakoid membrane (GO:0009535);; Cellular Component: chloroplast envelope (GO:0009941);;	--
RSG00740	0	0	0	0	0	0	0	0	0	--	--	--	--	--	--	--	--	--	--	--
RSG00741	3.26752	0.00293537	0.000667412	3.82789	1.85875e-17	4.3384	2.61753	0.00960951	5.15919	0.623547	1.32088	normal	0.596812	-1.21054	normal	0.964976	0.104102	normal	Biological Process: cell morphogenesis (GO:0000902);; Cellular Component: mitochondrial respiratory chain complex I (GO:0005747);; Biological Process: mitochondrial electron transport, NADH to ubiquinone (GO:0006120);; Biological Process: N-terminal protein myristoylation (GO:0006499);; Biological Process: ubiquitin-dependent protein catabolic process (GO:0006511);; Molecular Function: NADH dehyd…	K03942|0|brp:103855792|NADH dehydrogenase [ubiquinone] flavoprotein 1, mitochondrial-like; K03942 NADH dehydrogenase (ubiquinone) flavoprotein 1 [EC:1.6.5.3 1.6.99.3] (A)
RSG00742	11.2276	6.48759	10.1479	19.9188	26.5607	18.7797	42.9596	28.7179	37.7502	0.000554458	1.1654	up	6.37921e-11	-2.06588	down	0.00650317	-0.883981	normal	Molecular Function: DNA binding (GO:0003677);; Molecular Function: chromatin binding (GO:0003682);; Molecular Function: sequence-specific DNA binding transcription factor activity (GO:0003700);; Cellular Component: nucleus (GO:0005634);; Biological Process: regulation of transcription, DNA-templated (GO:0006355);;	--
RSG00743	0.840765	0.461539	1.13675	0.113367	0.184568	0.941489	0.513651	0.862514	0.488569	0.477708	-1.01635	normal	0.654569	0.421601	normal	0.689867	-0.568579	normal	Cellular Component: mitochondrion (GO:0005739);; Biological Process: response to water deprivation (GO:0009414);; Biological Process: response to abscisic acid (GO:0009737);; Biological Process: mitochondrial mRNA modification (GO:0080156);;	--
RSG00744	2.03593	1.91602	2.35391	0.982104	1.32707	2.51084	2.79903	1.25684	1.28953	--	--	--	--	--	--	--	--	--	Cellular Component: nucleus (GO:0005634);;	--
RSG00745	24.5906	24.4563	22.1743	18.82	18.3862	22.1772	29.8301	27.7208	25.2	0.5621	-0.228899	normal	0.533312	-0.216974	normal	0.203431	-0.426946	normal	Cellular Component: nucleus (GO:0005634);; Biological Process: protein glycosylation (GO:0006486);; Biological Process: sister chromatid cohesion (GO:0007062);; Biological Process: synapsis (GO:0007129);; Biological Process: reciprocal meiotic recombination (GO:0007131);; Biological Process: organ morphogenesis (GO:0009887);; Biological Process: tissue development (GO:0009888);; Biological Proces…	--
RSG00746	13.6489	7.24986	4.44847	7.52294	9.15976	7.06765	3.44517	3.69941	10.1737	0.990237	-0.0621168	normal	0.626188	0.552213	normal	0.647473	0.501515	normal	--	--
RSG00747	26.7171	19.0213	59.1214	24.2214	32.4684	23.5779	64.8973	55.0989	68.0779	0.756371	-0.359379	normal	0.0618568	-0.865935	normal	0.000958082	-1.20703	down	Biological Process: lipoate biosynthetic process (GO:0009107);; Cellular Component: chloroplast (GO:0009507);; Biological Process: leaf morphogenesis (GO:0009965);; Molecular Function: lipoate synthase activity (GO:0016992);; Biological Process: photosynthesis, light reaction (GO:0019684);; Biological Process: cell differentiation (GO:0030154);; Molecular Function: ferredoxin:thioredoxin reductas…	--
RSG00748	46.5655	18.0146	62.6418	11.1597	10.0055	13.1234	11.6698	10.388	14.3847	0.0732842	-1.90135	normal	0.046473	1.83163	normal	0.948548	-0.0543727	normal	Biological Process: photosystem II assembly (GO:0010207);;	--
RSG00749	2.96931	1.69552	3.35935	1.76031	1.96965	1.34817	3.54154	2.84231	2.97583	0.254386	-0.657386	normal	0.681301	-0.22465	normal	0.067029	-0.863298	normal	Molecular Function: nucleotide binding (GO:0000166);; Biological Process: cell adhesion (GO:0007155);; Molecular Function: microtubule binding (GO:0008017);; Cellular Component: katanin complex (GO:0008352);; Biological Process: trichome morphogenesis (GO:0010090);; Biological Process: vegetative to reproductive phase transition of meristem (GO:0010228);; Biological Process: protein desumoylation…	K18643|0|brp:103855783|katanin p80 WD40 repeat-containing subunit B1 homolog; K18643 katanin p80 WD40 repeat-containing subunit B1 (A)
RSG00750	3.67572	0	0	0	0	4.40054	8.46843	0	3.81329	--	--	--	--	--	--	--	--	--	--	--
RSG00751	2.71392	3.40121	4.2235	2.47958	2.43336	1.72404	1.23266	0.820556	1.06927	0.161395	-0.60112	normal	3.6781e-05	1.71561	up	0.0146562	1.12995	normal	--	--
RSG00752	10.3975	6.69318	6.65238	13.8841	9.15122	8.57919	16.7396	13.6794	16.3084	0.380028	0.499457	normal	0.00933587	-0.989854	normal	0.251815	-0.47694	normal	Biological Process: maltose metabolic process (GO:0000023);; Molecular Function: alpha-galactosidase activity (GO:0004557);; Cellular Component: extracellular region (GO:0005576);; Cellular Component: cytoplasm (GO:0005737);; Biological Process: microtubule nucleation (GO:0007020);; Cellular Component: plant-type cell wall (GO:0009505);; Biological Process: positive regulation of flower developme…	K07407|0|eus:EUTSA_v10013749mg|hypothetical protein; K07407 alpha-galactosidase [EC:3.2.1.22] (A)
RSG00753	0.852466	1.6414	1.09642	0.627963	1.37462	0	2.19705	2.31483	2.57362	--	--	--	--	--	--	--	--	--	Cellular Component: chloroplast (GO:0009507);;	--
RSG00754	17.839	13.2269	19.2473	10.3687	7.13074	15.8805	6.18148	7.35244	5.12146	0.277189	-0.521336	normal	0.000118164	1.45833	up	0.118612	0.956767	normal	Molecular Function: FMN adenylyltransferase activity (GO:0003919);; Biological Process: riboflavin biosynthetic process (GO:0009231);;	--
RSG00755	3.93624	3.1487	0.0240615	4.02497	7.05099	5.09634	7.20055	5.17634	4.4019	0.302081	1.18877	normal	0.17198	-1.27745	normal	0.973732	-0.0666577	normal	Molecular Function: protein C-terminal S-isoprenylcysteine carboxyl O-methyltransferase activity (GO:0004671);; Cellular Component: endoplasmic reticulum (GO:0005783);; Biological Process: C-terminal protein methylation (GO:0006481);; Biological Process: negative regulation of abscisic acid-activated signaling pathway (GO:0009788);; Biological Process: flower development (GO:0009908);; Cellular C…	K00587|2.91127e-118|brp:103855776|protein-S-isoprenylcysteine O-methyltransferase B; K00587 protein-S-isoprenylcysteine O-methyltransferase [EC:2.1.1.100] (A)
RSG00756	8.27099	4.02977	1.36482	6.50555	5.5342	8.30332	7.41782	9.52909	6.37865	0.54236	0.604722	normal	0.299354	-0.73621	normal	0.887143	-0.110109	normal	Biological Process: MAPK cascade (GO:0000165);; Molecular Function: sequence-specific DNA binding transcription factor activity (GO:0003700);; Molecular Function: protein binding (GO:0005515);; Cellular Component: nucleus (GO:0005634);; Biological Process: protein targeting to membrane (GO:0006612);; Biological Process: response to bacterium (GO:0009617);; Biological Process: systemic acquired re…	K16221|5.36008e-87|eus:EUTSA_v10014503mg|hypothetical protein; K16221 transcription factor TCP21 (protein CCA1 HIKING EXPEDITION) (A)
RSG00757	3.19761	2.26282	3.32569	0.887415	0.301606	1.59975	1.72399	2.14176	1.22313	0.00324716	-1.71558	down	0.16097	0.837085	normal	0.256085	-0.859227	normal	Cellular Component: mitochondrion (GO:0005739);;	--
RSG00758	58.1115	66.1615	68.9142	96.9969	83.4305	90.399	52.988	62.8788	47.3157	0.10316	0.509241	normal	0.460629	0.253381	normal	0.0106224	0.782407	normal	Molecular Function: nucleotide binding (GO:0000166);; Molecular Function: ATP citrate synthase activity (GO:0003878);; Molecular Function: succinate-CoA ligase (ADP-forming) activity (GO:0004775);; Molecular Function: succinate-CoA ligase (GDP-forming) activity (GO:0004776);; Molecular Function: copper ion binding (GO:0005507);; Cellular Component: cell wall (GO:0005618);; Cellular Component: mit…	K01899|0|brp:103855774|succinyl-CoA ligase [ADP-forming] subunit alpha-1, mitochondrial; K01899 succinyl-CoA synthetase alpha subunit [EC:6.2.1.4 6.2.1.5] (A)
RSG00759	110.483	106.655	84.4604	132.004	119.729	127.91	52.5463	56.3737	62.9476	0.332199	0.371712	normal	0.0220817	0.815303	normal	0.000237859	1.20398	up	Biological Process: cell morphogenesis (GO:0000902);; Molecular Function: catalytic activity (GO:0003824);; Cellular Component: spliceosomal complex (GO:0005681);; Biological Process: protein targeting to vacuole (GO:0006623);; Biological Process: membrane fusion (GO:0006944);; Biological Process: Golgi organization (GO:0007030);; Biological Process: vacuole organization (GO:0007033);; Biological…	K12859|4.997e-103|brp:103847147|thioredoxin-like protein YLS8; K12859 U5 snRNP protein, DIM1 family (A)
RSG00760	8.54778	9.16136	9.42172	0.902294	0.323296	0.628254	4.31536	2.78075	2.57289	3.20624e-16	-3.92334	down	0.0012024	1.48206	up	0.000420176	-2.43024	down	Molecular Function: serine-type carboxypeptidase activity (GO:0004185);; Cellular Component: extracellular region (GO:0005576);; Biological Process: proteolysis (GO:0006508);;	K16297|0|brp:103855769|serine carboxypeptidase-like 35; K16297 serine carboxypeptidase-like clade II [EC:3.4.16.-] (A)
RSG00761	2.55908	3.77313	3.96949	7.37475	7.74803	4.08018	9.66545	8.47123	7.61125	0.0738087	0.956097	normal	0.00426281	-1.36934	down	0.455994	-0.394469	normal	Cellular Component: nucleus (GO:0005634);; Biological Process: cell wall macromolecule catabolic process (GO:0016998);;	--
RSG00762	26.8361	24.7498	22.9009	18.1138	12.9562	24.3727	30.2269	29.6204	29.5939	0.274571	-0.405224	normal	0.43826	-0.269994	normal	0.0444925	-0.658517	normal	Molecular Function: protein-arginine deiminase activity (GO:0004668);; Cellular Component: nucleus (GO:0005634);; Biological Process: putrescine biosynthetic process (GO:0009446);; Biological Process: embryo development ending in seed dormancy (GO:0009793);; Molecular Function: agmatine deiminase activity (GO:0047632);;	K10536|0|brp:103855763|agmatine deiminase-like; K10536 agmatine deiminase [EC:3.5.3.12] (A)
RSG00763	5.41633	3.40842	6.73185	4.50271	3.92909	2.81185	5.70711	4.78043	5.29008	0.576854	-0.4345	normal	0.99977	-0.0139039	normal	0.53428	-0.432201	normal	Molecular Function: protein serine/threonine kinase activity (GO:0004674);; Molecular Function: ATP binding (GO:0005524);; Cellular Component: cytosol (GO:0005829);; Cellular Component: plasma membrane (GO:0005886);; Biological Process: protein phosphorylation (GO:0006468);; Biological Process: positive regulation of translation (GO:0045727);;	K08856|0|brp:103855762|probable serine/threonine-protein kinase DDB_G0291350; K08856 serine/threonine kinase 16 [EC:2.7.11.1] (A)
RSG00764	0	0	0	0	0	0	0	0	0.586582	--	--	--	--	--	--	--	--	--	Cellular Component: cell wall (GO:0005618);; Cellular Component: nucleus (GO:0005634);; Cellular Component: cytoplasm (GO:0005737);; Cellular Component: plasma membrane (GO:0005886);; Biological Process: cytokinin metabolic process (GO:0009690);;	--
RSG00765	1.19029	0.452569	1.08446	0.230898	0.475983	0.0840679	4.09109	3.03018	4.7814	--	--	--	0.0022834	-2.1693	down	4.18624e-07	-3.95168	down	--	--
RSG00766	2.13064	3.01611	2.83716	3.74805	3.19002	2.45687	18.9514	14.9912	14.9798	0.867523	0.207649	normal	9.00955e-09	-2.57685	down	3.01756e-08	-2.35296	down	--	--
RSG00767	7.21001	40.0345	9.76129	54.6339	71.6199	62.5842	21.6214	16.0062	17.0126	0.000305309	1.30569	up	0.191227	-0.654884	normal	0.0410308	0.66998	normal	Molecular Function: DNA binding (GO:0003677);; Molecular Function: sequence-specific DNA binding transcription factor activity (GO:0003700);; Cellular Component: nucleus (GO:0005634);; Biological Process: regulation of transcription, DNA-templated (GO:0006355);; Biological Process: brassinosteroid mediated signaling pathway (GO:0009742);; Biological Process: determination of bilateral symmetry (G…	--
RSG00768	16.0551	2.27377	21.076	6.02764	7.18208	5.12922	24.3063	13.2666	30.2306	0.473984	-1.05154	normal	0.349631	-0.772114	normal	0.00535875	-1.81022	down	Molecular Function: asparaginase activity (GO:0004067);; Cellular Component: cytosol (GO:0005829);; Biological Process: glycoprotein catabolic process (GO:0006516);; Biological Process: asparagine catabolic process via L-aspartate (GO:0033345);; Biological Process: protein maturation (GO:0051604);;	K13051|0|eus:EUTSA_v10014145mg|hypothetical protein; K13051 beta-aspartyl-peptidase (threonine type) [EC:3.4.19.5] (A)
RSG00769	2.96254	0.521956	6.15859	1.08048	0.421843	1.07884	10.9932	6.11657	7.34931	0.350108	-1.24858	normal	0.033281	-1.24768	normal	4.57163e-06	-2.48097	down	Biological Process: purine nucleobase transport (GO:0006863);;	--
RSG00770	0	0	0	0	0	0	0.285283	0	0	--	--	--	--	--	--	--	--	--	Cellular Component: mitochondrion (GO:0005739);; Biological Process: purine nucleobase transport (GO:0006863);;	--
RSG00771	28.1199	24.6028	21.1439	18.7007	22.9663	22.0719	31.0293	36.8794	28.0862	0.866418	-0.151758	normal	0.425623	-0.439034	normal	0.294114	-0.568484	normal	Molecular Function: SNAP receptor activity (GO:0005484);; Cellular Component: nucleus (GO:0005634);; Cellular Component: trans-Golgi network (GO:0005802);; Cellular Component: cytosol (GO:0005829);; Cellular Component: plasma membrane (GO:0005886);; Biological Process: intracellular protein transport (GO:0006886);; Biological Process: membrane fusion (GO:0006944);; Cellular Component: cell plate …	K08486|3.5771e-62|brp:103855758|syntaxin-132; K08486 syntaxin 1B/2/3 (A)
RSG00772	0.909641	0.717089	0.910554	1.41667	0.762373	0.471701	0.291359	0.96577	0.602397	--	--	--	--	--	--	--	--	--	Molecular Function: sequence-specific DNA binding transcription factor activity (GO:0003700);; Cellular Component: nucleus (GO:0005634);; Biological Process: regulation of transcription, DNA-templated (GO:0006355);; Biological Process: leaf morphogenesis (GO:0009965);; Biological Process: cell differentiation (GO:0030154);; Biological Process: positive regulation of development, heterochronic (GO…	--
RSG00773	369.493	236.611	370.73	138.493	126.942	176.18	116.902	81.4191	144.636	0.0016613	-1.06115	down	1.23654e-05	1.48253	up	0.279164	0.435062	normal	Biological Process: pentose-phosphate shunt (GO:0006098);; Cellular Component: chloroplast thylakoid membrane (GO:0009535);; Biological Process: chloroplast organization (GO:0009658);; Biological Process: photosynthetic electron transport in photosystem I (GO:0009773);; Biological Process: chlorophyll biosynthetic process (GO:0015995);; Biological Process: positive regulation of transcription, DN…	--
RSG00774	1.05825	2.81208	2.45741	1.81523	1.65351	0.776353	0.221865	0.354969	0.400606	0.562315	-0.543951	normal	0.000711063	2.72941	up	0.00653561	2.20146	up	Biological Process: double-strand break repair via homologous recombination (GO:0000724);; Molecular Function: DNA binding (GO:0003677);; Cellular Component: nucleus (GO:0005634);; Biological Process: DNA replication initiation (GO:0006270);; Biological Process: regulation of DNA replication (GO:0006275);; Biological Process: DNA methylation (GO:0006306);; Biological Process: cell proliferation (…	K07466|0|brp:103855752|replication protein A 70 kDa DNA-binding subunit B; K07466 replication factor A1 (A)
RSG00775	1.80716	1.08499	2.47815	2.64844	2.68557	2.43116	2.71384	4.5781	3.83525	0.588888	0.413001	normal	0.146941	-0.807267	normal	0.541349	-0.374279	normal	Molecular Function: NAD kinase activity (GO:0003951);; Molecular Function: diacylglycerol kinase activity (GO:0004143);; Molecular Function: calcium ion binding (GO:0005509);; Cellular Component: cytoplasm (GO:0005737);; Biological Process: membrane fusion (GO:0006944);; Biological Process: protein kinase C-activating G-protein coupled receptor signaling pathway (GO:0007205);; Biological Process:…	K00901|0|eus:EUTSA_v10012787mg|hypothetical protein; K00901 diacylglycerol kinase (ATP) [EC:2.7.1.107] (A)
RSG00777	0	0	0	0	0	0	0	0	0	--	--	--	--	--	--	--	--	--	--	--
RSG00778	4.9131	3.73686	5.66932	5.88036	5.13529	4.35653	3.87978	2.76549	4.18506	0.970028	0.0435806	normal	0.650058	0.259671	normal	0.572885	0.3174	normal	Cellular Component: nucleus (GO:0005634);; Cellular Component: cytoplasm (GO:0005737);;	--
RSG00779	6.72562	6.52135	9.71649	7.66935	7.3912	8.00047	7.96393	10.2491	13.2596	0.739247	0.206647	normal	0.241127	-0.514364	normal	0.552989	-0.289817	normal	Cellular Component: cytoplasm (GO:0005737);; Molecular Function: transferase activity, transferring acyl groups other than amino-acyl groups (GO:0016747);;	--
RSG00780	0.980927	0.651629	3.60112e-05	0.621997	0.167234	0.246552	0.228291	3.70184e-06	0.00245362	--	--	--	--	--	--	--	--	--	Cellular Component: plasma membrane (GO:0005886);;	--
RSG00781	0	0	0	0	0	0	0	0.151469	0	--	--	--	--	--	--	--	--	--	Biological Process: telomere maintenance (GO:0000723);; Cellular Component: chromosome, telomeric region (GO:0000781);; Molecular Function: double-stranded telomeric DNA binding (GO:0003691);; Cellular Component: nucleus (GO:0005634);; Biological Process: regulation of transcription, DNA-templated (GO:0006355);; Biological Process: transcription initiation from RNA polymerase II promoter (GO:0006…	K03120|4.10906e-127|brp:103855680|TATA-box-binding protein 1-like; K03120 transcription initiation factor TFIID TATA-box-binding protein (A)
RSG00782	9.12374	4.27766	10.4478	5.14805	6.07268	3.87213	11.979	9.44502	11.6958	0.301634	-0.730349	normal	0.133467	-0.588665	normal	3.56381e-05	-1.3021	down	Molecular Function: DNA binding (GO:0003677);; Molecular Function: helicase activity (GO:0004386);; Molecular Function: endonuclease activity (GO:0004519);; Molecular Function: ATP binding (GO:0005524);; Cellular Component: nucleus (GO:0005634);; Biological Process: DNA recombination (GO:0006310);; Biological Process: meiotic nuclear division (GO:0007126);; Biological Process: response to gamma r…	--
RSG00783	0	0	0	0	0	0.162869	0.154512	0.125969	0.126423	--	--	--	--	--	--	--	--	--	Cellular Component: nucleus (GO:0005634);;	--
RSG00784	0.0811001	0.170507	0	0.0994096	0	0	0	0.0848088	0	--	--	--	--	--	--	--	--	--	Cellular Component: cytosol (GO:0005829);; Cellular Component: proteasome regulatory particle, lid subcomplex (GO:0008541);; Biological Process: leaf morphogenesis (GO:0009965);; Biological Process: DNA endoreduplication (GO:0042023);; Biological Process: proteasome-mediated ubiquitin-dependent protein catabolic process (GO:0043161);; Biological Process: regulation of unidimensional cell growth (…	K03038|6.49636e-150|brp:103839433|26S proteasome non-ATPase regulatory subunit 7 homolog A-like; K03038 26S proteasome regulatory subunit N8 (A)
RSG00785	2.67777	2.21029	2.40165	2.5087	2.21052	2.72383	2.21903	2.91498	2.24452	1	-0.0103417	normal	1	-0.00620805	normal	1	0.00441295	normal	--	--
RSG00786	0	0	0	0	0.27116	0	0.178498	0.0713515	0	--	--	--	--	--	--	--	--	--	Molecular Function: actin binding (GO:0003779);; Cellular Component: cytoplasm (GO:0005737);; Cellular Component: actin filament (GO:0005884);; Biological Process: actin nucleation (GO:0045010);;	--
RSG00787	0	0.229569	0	0.0443613	0.0474042	0.102261	0	0	0.0388216	--	--	--	--	--	--	--	--	--	Cellular Component: cytoplasm (GO:0005737);;	K18080|4.31212e-142|eus:EUTSA_v10016030mg|hypothetical protein; K18080 tensin (A)
RSG00788	3.9422	3.52022	4.05704	3.06413	3.31377	3.26759	7.63619	7.39255	6.56222	0.590554	-0.259575	normal	0.00466265	-0.907993	normal	0.000344551	-1.14762	down	Molecular Function: actin binding (GO:0003779);; Cellular Component: cytoplasm (GO:0005737);; Cellular Component: actin filament (GO:0005884);; Biological Process: actin nucleation (GO:0045010);;	--
RSG00789	0.14294	0.301301	0.186021	0	0	0	0	0	0	--	--	--	--	--	--	--	--	--	Molecular Function: DNA binding (GO:0003677);; Molecular Function: chromatin binding (GO:0003682);; Molecular Function: sequence-specific DNA binding transcription factor activity (GO:0003700);; Cellular Component: nucleus (GO:0005634);; Biological Process: regulation of transcription, DNA-templated (GO:0006355);; Biological Process: response to water deprivation (GO:0009414);; Biological Process…	K09422|0|brp:103855740|transcription factor MYB29-like; K09422 myb proto-oncogene protein, plant (A)
RSG00790	0.386753	0.306663	1.07912	0.119053	0.254425	0	0.127866	0.204293	0.531868	--	--	--	--	--	--	--	--	--	--	--
RSG00791	0.817441	0.437623	1.57163	1.23976	0.546847	0.574051	1.95885	0.426121	1.64961	--	--	--	--	--	--	--	--	--	Molecular Function: protein tyrosine kinase activity (GO:0004713);; Molecular Function: ATP binding (GO:0005524);; Cellular Component: plasma membrane (GO:0005886);; Biological Process: protein phosphorylation (GO:0006468);;	--
RSG00792	1.68046	0.47908	2.45844	0.10947	1.45864	0.495776	0.775927	0.912639	1.39651	0.484334	-1.21656	normal	0.644721	0.568538	normal	--	--	--	Cellular Component: nucleus (GO:0005634);;	--
RSG00793	0	0	0	0	0	0	0	0	0	--	--	--	--	--	--	--	--	--	--	--
RSG00794	0	0	0	0	0	0	0	0	0	--	--	--	--	--	--	--	--	--	Cellular Component: monolayer-surrounded lipid storage body (GO:0012511);; Cellular Component: integral component of membrane (GO:0016021);;	--
RSG00795	0.129169	0.256751	0.174864	0.164335	0.177198	0.181524	0	0	0	--	--	--	--	--	--	--	--	--	Cellular Component: extracellular region (GO:0005576);; Molecular Function: lipid binding (GO:0008289);; Biological Process: plant-type cell wall modification (GO:0009827);; Biological Process: pollen hydration (GO:0009859);; Biological Process: pollen tube growth (GO:0009860);; Cellular Component: monolayer-surrounded lipid storage body (GO:0012511);; Cellular Component: integral component of me…	--
RSG00796	0.430211	0.145128	0	0.174176	0	1.93803	0	1.35979	0.151769	--	--	--	--	--	--	--	--	--	Biological Process: cell morphogenesis (GO:0000902);; Cellular Component: cytosol (GO:0005829);; Biological Process: cellular protein modification process (GO:0006464);; Biological Process: membrane fusion (GO:0006944);; Biological Process: response to oxidative stress (GO:0006979);; Molecular Function: peptide-methionine (S)-S-oxide reductase activity (GO:0008113);; Biological Process: cell grow…	K07304|1.63985e-133|brp:103855730|peptide methionine sulfoxide reductase A3-like; K07304 peptide-methionine (S)-S-oxide reductase [EC:1.8.4.11] (A)
RSG00797	0	0.34131	0.167767	0.156423	0.164519	0.766799	0	2.01261	0	--	--	--	--	--	--	--	--	--	Biological Process: cell morphogenesis (GO:0000902);; Cellular Component: cytosol (GO:0005829);; Biological Process: cellular protein modification process (GO:0006464);; Biological Process: membrane fusion (GO:0006944);; Biological Process: response to oxidative stress (GO:0006979);; Molecular Function: peptide-methionine (S)-S-oxide reductase activity (GO:0008113);; Biological Process: cell grow…	K07304|1.93267e-129|brp:103855730|peptide methionine sulfoxide reductase A3-like; K07304 peptide-methionine (S)-S-oxide reductase [EC:1.8.4.11] (A)
RSG00798	0.94394	0.608026	0.310662	0.431848	0	0.639407	0	5.41854	0.136817	--	--	--	--	--	--	--	--	--	Biological Process: cell morphogenesis (GO:0000902);; Cellular Component: cytosol (GO:0005829);; Biological Process: cellular protein modification process (GO:0006464);; Biological Process: membrane fusion (GO:0006944);; Biological Process: response to oxidative stress (GO:0006979);; Molecular Function: peptide-methionine (S)-S-oxide reductase activity (GO:0008113);; Biological Process: cell grow…	K07304|3.90144e-131|brp:103855730|peptide methionine sulfoxide reductase A3-like; K07304 peptide-methionine (S)-S-oxide reductase [EC:1.8.4.11] (A)
RSG00799	12.5982	11.6986	13.7352	28.6681	15.85	27.7984	5.86293	15.4951	5.32495	0.0371789	0.992006	normal	0.44008	0.484075	normal	0.0102203	1.50112	normal	Cellular Component: cytosol (GO:0005829);; Biological Process: cellular protein modification process (GO:0006464);; Molecular Function: peptide-methionine (S)-S-oxide reductase activity (GO:0008113);; Cellular Component: chloroplast (GO:0009507);; Molecular Function: L-methionine:thioredoxin-disulfide S-oxidoreductase activity (GO:0033744);; Biological Process: cellular response to oxidative stre…	K07304|6.15856e-151|brp:103856844|peptide methionine sulfoxide reductase A2-like; K07304 peptide-methionine (S)-S-oxide reductase [EC:1.8.4.11] (A)
RSG00800	133.049	196.94	152.79	133.668	113.673	185.98	155.137	158.996	183.053	0.953114	-0.0509233	normal	0.890755	0.0593622	normal	0.967452	0.0253325	normal	Molecular Function: glutamate dehydrogenase (NAD) activity (GO:0004352);; Molecular Function: glutamate dehydrogenase [NAD(P)] activity (GO:0004353);; Molecular Function: copper ion binding (GO:0005507);; Molecular Function: ATP binding (GO:0005524);; Cellular Component: mitochondrion (GO:0005739);; Cellular Component: vacuolar membrane (GO:0005774);; Cellular Component: Golgi apparatus (GO:00057…	K00261|7.39079e-42|eus:EUTSA_v10013680mg|hypothetical protein; K00261 glutamate dehydrogenase (NAD(P)) [EC:1.4.1.3] (A)
RSG00801	0.22195	0.115537	0.561639	0.258361	0	0	0.4206	0.234227	0.479186	--	--	--	--	--	--	--	--	--	Cellular Component: cytosol (GO:0005829);; Biological Process: cellular protein modification process (GO:0006464);; Molecular Function: peptide-methionine (S)-S-oxide reductase activity (GO:0008113);; Cellular Component: chloroplast (GO:0009507);; Molecular Function: L-methionine:thioredoxin-disulfide S-oxidoreductase activity (GO:0033744);; Biological Process: cellular response to oxidative stre…	K07304|1.34681e-143|brp:103856844|peptide methionine sulfoxide reductase A2-like; K07304 peptide-methionine (S)-S-oxide reductase [EC:1.8.4.11] (A)
RSG00803	0.140365	0	0	0	0	0	0	0	0	--	--	--	--	--	--	--	--	--	Cellular Component: extracellular region (GO:0005576);; Cellular Component: plant-type cell wall (GO:0009505);; Biological Process: plant-type cell wall modification (GO:0009827);; Biological Process: pollen tube growth (GO:0009860);; Molecular Function: pectinesterase activity (GO:0030599);; Molecular Function: aspartyl esterase activity (GO:0045330);;	--
RSG00804	0.071907	0.127655	0.0597016	0	0.0629188	0.13636	0	0.0249772	0.0258858	--	--	--	--	--	--	--	--	--	Molecular Function: calcium ion binding (GO:0005509);; Cellular Component: nucleus (GO:0005634);; Cellular Component: mitochondrion (GO:0005739);; Cellular Component: integral component of plasma membrane (GO:0005887);; Biological Process: aerobic respiration (GO:0009060);; Biological Process: response to zinc ion (GO:0010043);; Biological Process: regulation of anion channel activity (GO:0010359…	K13447|0|eus:EUTSA_v10012617mg|hypothetical protein; K13447 respiratory burst oxidase [EC:1.6.3.- 1.11.1.-] (A)
RSG00805	0	0	0	0	0	0	0	0	0	--	--	--	--	--	--	--	--	--	Molecular Function: calcium ion binding (GO:0005509);; Cellular Component: nucleus (GO:0005634);; Cellular Component: mitochondrion (GO:0005739);; Biological Process: defense response (GO:0006952);; Biological Process: response to zinc ion (GO:0010043);; Molecular Function: oxidoreductase activity (GO:0016491);; Cellular Component: intrinsic component of plasma membrane (GO:0031226);;	K13447|0|eus:EUTSA_v10012617mg|hypothetical protein; K13447 respiratory burst oxidase [EC:1.6.3.- 1.11.1.-] (A)
RSG00806	0	0	0	0	0	0	0	0	0	--	--	--	--	--	--	--	--	--	Molecular Function: binding (GO:0005488);;	--
RSG00807	0	0	0	0	0	0.037053	0	0.0270963	0	--	--	--	--	--	--	--	--	--	--	--
RSG00808	40.3019	40.467	45.9672	44.9573	43.4636	43.2512	83.6693	89.3428	80.2616	0.882851	0.0764881	normal	0.00134812	-0.981183	normal	0.00365446	-0.885555	normal	Molecular Function: RNA binding (GO:0003723);; Molecular Function: nuclease activity (GO:0004518);; Cellular Component: cell wall (GO:0005618);; Cellular Component: nuclear envelope (GO:0005635);; Cellular Component: endoplasmic reticulum (GO:0005783);; Cellular Component: cytosol (GO:0005829);; Cellular Component: plasma membrane (GO:0005886);; Biological Process: pentose-phosphate shunt (GO:000…	K15979|0|brp:103855724|staphylococcal nuclease domain-containing protein 1-like; K15979 staphylococcal nuclease domain-containing protein 1 (A)
RSG00809	14.014	13.9906	15.459	14.5641	14.0773	13.2655	19.319	15.2494	15.5981	0.972019	-0.0285495	normal	0.615991	-0.204622	normal	0.622188	-0.215679	normal	Molecular Function: protein binding (GO:0005515);; Molecular Function: calcium-dependent phospholipid binding (GO:0005544);; Cellular Component: nucleus (GO:0005634);; Cellular Component: plasma membrane (GO:0005886);; Cellular Component: plasmodesma (GO:0009506);; Biological Process: cytokinin metabolic process (GO:0009690);;	--
RSG00810	0	0	0	0	0	0	0	0	0.212755	--	--	--	--	--	--	--	--	--	Cellular Component: nucleus (GO:0005634);; Cellular Component: plasmodesma (GO:0009506);;	--
RSG00811	13.2078	10.0436	11.5258	19.3189	23.9076	20.3315	17.9944	25.1158	20.2778	0.0099231	0.895212	normal	0.0170025	-0.876207	normal	0.950087	0.0410663	normal	Molecular Function: calmodulin binding (GO:0005516);; Cellular Component: nucleus (GO:0005634);;	--
RSG00812	0	0	0	0	0	0	0	0	0	--	--	--	--	--	--	--	--	--	Molecular Function: phosphorelay response regulator activity (GO:0000156);; Molecular Function: sequence-specific DNA binding transcription factor activity (GO:0003700);; Molecular Function: binding (GO:0005488);; Cellular Component: nucleus (GO:0005634);; Biological Process: regulation of transcription, DNA-templated (GO:0006355);; Cellular Component: chloroplast (GO:0009507);; Biological Proces…	K14491|0|brp:103855720|putative two-component response regulator ARR21; K14491 two-component response regulator ARR-B family (A)
RSG00813	0	0.0768121	0	0	0	0	0.280418	0	0.0784104	--	--	--	--	--	--	--	--	--	Molecular Function: iron ion binding (GO:0005506);; Cellular Component: cytoplasm (GO:0005737);; Biological Process: fatty acid catabolic process (GO:0009062);; Biological Process: gibberellin biosynthetic process (GO:0009686);; Molecular Function: gibberellin 20-oxidase activity (GO:0045544);; Biological Process: oxidation-reduction process (GO:0055114);;	K05282|0|brp:103847081|gibberellin 20 oxidase 3; K05282 gibberellin 20-oxidase [EC:1.14.11.12] (A)
RSG00814	0	0	0	0	0	0	0	0	0	--	--	--	--	--	--	--	--	--	Cellular Component: nucleus (GO:0005634);;	--
RSG00815	0	0	0	0	0	0	0	0	0	--	--	--	--	--	--	--	--	--	--	--
RSG00816	7.55493	8.61767	8.13809	16.3265	13.7702	11.9701	23.5052	22.5189	15.0403	0.0175597	0.803206	normal	2.93676e-05	-1.32811	down	0.15381	-0.505314	normal	Cellular Component: nucleus (GO:0005634);; Cellular Component: cytosol (GO:0005829);; Biological Process: vesicle-mediated transport (GO:0016192);; Cellular Component: retromer complex (GO:0030904);; Cellular Component: multivesicular body membrane (GO:0032585);; Molecular Function: phosphatidylinositol binding (GO:0035091);; Biological Process: intracellular signal transduction (GO:0035556);; Mo…	--
RSG00817	22.357	21.2208	20.14	29.9036	33.909	18.3524	43.3931	28.8372	32.5279	0.440418	0.401229	normal	0.0422177	-0.832255	normal	0.357709	-0.412496	normal	Cellular Component: endoplasmic reticulum (GO:0005783);; Cellular Component: Golgi apparatus (GO:0005794);; Biological Process: vesicle-mediated transport (GO:0016192);;	--
RSG00819	185.046	205.394	247.727	121.735	102.514	164.079	42.9867	70.8367	44.4021	0.020245	-0.67436	normal	1.01367e-12	1.97832	up	0.00122301	1.32598	up	--	K02987|9.8861e-173|brp:103845268|40S ribosomal protein S4-1; K02987 small subunit ribosomal protein S4e (A)
RSG00820	26.7645	31.5647	22.9419	3.62379	4.01656	2.05201	16.8576	10.8625	23.829	2.61624e-15	-3.07847	down	0.121933	0.637524	normal	0.000465035	-2.42801	down	Molecular Function: aspartic-type endopeptidase activity (GO:0004190);; Cellular Component: extracellular region (GO:0005576);; Biological Process: proteolysis (GO:0006508);; Cellular Component: plant-type cell wall (GO:0009505);;	--
RSG00821	0.832791	1.53657	0.175899	0	0	0	0	0.22047	0.149385	--	--	--	--	--	--	--	--	--	Cellular Component: chloroplast (GO:0009507);; Biological Process: response to wounding (GO:0009611);; Biological Process: jasmonic acid biosynthetic process (GO:0009695);; Biological Process: jasmonic acid mediated signaling pathway (GO:0009867);; Molecular Function: hydroxyjasmonate sulfotransferase activity (GO:0080131);;	--
RSG00822	0.0949429	0.0985648	0	0	0	0.133435	0	0	0	--	--	--	--	--	--	--	--	--	Cellular Component: nucleus (GO:0005634);; Cellular Component: cytosol (GO:0005829);; Biological Process: fatty acid beta-oxidation (GO:0006635);; Cellular Component: proteasome regulatory particle, lid subcomplex (GO:0008541);; Biological Process: toxin catabolic process (GO:0009407);; Biological Process: leaf morphogenesis (GO:0009965);; Biological Process: seed dormancy process (GO:0010162);; …	K03038|4.95447e-146|brp:103839433|26S proteasome non-ATPase regulatory subunit 7 homolog A-like; K03038 26S proteasome regulatory subunit N8 (A)
RSG00823	0	0	0	0	0	0	0	0	0	--	--	--	--	--	--	--	--	--	--	--
RSG00824	0	0	0	0	0	0	0	0	0	--	--	--	--	--	--	--	--	--	Cellular Component: extracellular region (GO:0005576);; Biological Process: purine nucleobase transport (GO:0006863);;	--
RSG00825	0.0147711	0.291578	0.230175	0.017798	0.0191399	0.0847445	0	0.0155175	0	--	--	--	--	--	--	--	--	--	Molecular Function: helicase activity (GO:0004386);; Cellular Component: nucleus (GO:0005634);; Cellular Component: cytoplasm (GO:0005737);; Biological Process: protein glycosylation (GO:0006486);; Molecular Function: organic cyclic compound binding (GO:0097159);; Molecular Function: heterocyclic compound binding (GO:1901363);;	K12858|7.25573e-72|brp:103865293|DEAD-box ATP-dependent RNA helicase 21; K12858 ATP-dependent RNA helicase DDX23/PRP28 [EC:3.6.4.13] (A)
RSG00826	0	0	0	0	0	0	0	0	0	--	--	--	--	--	--	--	--	--	--	--
RSG00827	0	0	0	0	0	0	0	0	0	--	--	--	--	--	--	--	--	--	Cellular Component: extracellular region (GO:0005576);; Biological Process: purine nucleobase transport (GO:0006863);;	--
RSG00828	0	0	0	0	0	0	0	0	0	--	--	--	--	--	--	--	--	--	--	--
RSG00829	0	0	0	0.113045	0.123378	0	0	0	0	--	--	--	--	--	--	--	--	--	--	--
RSG00830	0.449975	0.470914	0.147163	0.415753	0.444829	2.38197	0	0.242306	0	--	--	--	--	--	--	--	--	--	--	--
RSG00831	0	0	0	0	0	0	0	0	0	--	--	--	--	--	--	--	--	--	--	--
RSG00832	4.36635e-05	2.58873e-05	0.000106307	0.212072	7.40698e-05	0.000204259	0.14316	5.1341e-05	4.25252e-05	--	--	--	--	--	--	--	--	--	Molecular Function: protein binding (GO:0005515);; Cellular Component: nucleus (GO:0005634);; Cellular Component: endoplasmic reticulum (GO:0005783);; Cellular Component: plasmodesma (GO:0009506);; Biological Process: cellular protein localization (GO:0034613);; Biological Process: long-day photoperiodism, flowering (GO:0048574);;	--
RSG00833	1.14876	2.37152	0.574418	0.430536	1.40297	1.28181	1.80036	2.90705	3.51764	0.858402	-0.366174	normal	0.102057	-1.1087	normal	0.0230956	-1.44901	normal	Molecular Function: DNA binding (GO:0003677);; Molecular Function: sequence-specific DNA binding transcription factor activity (GO:0003700);; Cellular Component: nucleus (GO:0005634);; Biological Process: response to xenobiotic stimulus (GO:0009410);; Biological Process: endoplasmic reticulum unfolded protein response (GO:0030968);;	K14431|0|brp:103855703|transcription factor TGA2-like; K14431 transcription factor TGA (A)
RSG00834	0.232609	0.472924	0.325852	0.435421	0.306663	0.0887599	0.324571	0.653232	0.294245	0.902911	-0.278481	normal	0.785794	-0.341623	normal	0.623811	-0.597483	normal	Molecular Function: protein serine/threonine kinase activity (GO:0004674);; Molecular Function: protein tyrosine kinase activity (GO:0004713);; Molecular Function: ATP binding (GO:0005524);; Cellular Component: extracellular region (GO:0005576);; Biological Process: protein phosphorylation (GO:0006468);; Biological Process: transmembrane receptor protein tyrosine kinase signaling pathway (GO:0007…	--
RSG00835	18.5964	19.4404	17.5602	13.7759	12.3269	11.7772	39.957	24.1051	30.3541	0.134783	-0.535353	normal	0.015123	-0.783027	normal	0.000535615	-1.30337	down	Cellular Component: nucleus (GO:0005634);; Cellular Component: endosome (GO:0005768);; Cellular Component: Golgi apparatus (GO:0005794);; Cellular Component: trans-Golgi network (GO:0005802);; Biological Process: plant-type cell wall modification (GO:0009827);; Biological Process: plant-type secondary cell wall biogenesis (GO:0009834);; Biological Process: cellulose biosynthetic process (GO:00302…	--
RSG00836	221.459	165.808	218.272	143.097	111.747	236.41	135.657	127.504	134.289	0.668724	-0.263266	normal	0.0364118	0.629406	normal	0.48641	0.38338	normal	--	--
RSG00837	0	0	0	0	0	0	0	0	0	--	--	--	--	--	--	--	--	--	--	--
RSG00839	0	0	0	0	0	0	1.35468	1.51972	0.377438	--	--	--	--	--	--	--	--	--	Biological Process: telomere maintenance (GO:0000723);; Cellular Component: chromosome, telomeric region (GO:0000781);; Molecular Function: double-stranded telomeric DNA binding (GO:0003691);; Molecular Function: protein binding (GO:0005515);; Cellular Component: nucleus (GO:0005634);; Biological Process: DNA-templated transcription, initiation (GO:0006352);; Biological Process: response to water…	K03120|2.07643e-77|brp:103855680|TATA-box-binding protein 1-like; K03120 transcription initiation factor TFIID TATA-box-binding protein (A)
RSG00840	3.94868	8.263	3.65604	4.26671	6.63213	3.55885	2.79404	2.40544	2.68644	0.936268	-0.113219	normal	0.160599	1.00347	normal	0.145142	0.909957	normal	Cellular Component: nucleus (GO:0005634);;	--
RSG00841	23.9308	20.8848	24.936	20.0047	18.4513	23.5211	18.0327	20.072	17.6411	0.700544	-0.164001	normal	0.333583	0.317002	normal	0.670174	0.172313	normal	Molecular Function: ubiquitin thiolesterase activity (GO:0004221);; Biological Process: ubiquitin-dependent protein catabolic process (GO:0006511);; Molecular Function: cysteine-type peptidase activity (GO:0008234);;	K11838|0|brp:103855679|ubiquitin carboxyl-terminal hydrolase 12-like; K11838 ubiquitin carboxyl-terminal hydrolase 7 [EC:3.4.19.12] (A)
RSG00842	0	0	0	0	0	0	0	0	0	--	--	--	--	--	--	--	--	--	Cellular Component: nucleus (GO:0005634);; Biological Process: amino acid transport (GO:0006865);; Biological Process: metabolic process (GO:0008152);; Molecular Function: hydrolase activity (GO:0016787);;	--
RSG00843	0.349224	0.280393	1.31137e-06	0.091049	1.09633e-07	0.211643	1.56914e-05	2.97963e-05	0.914991	--	--	--	--	--	--	--	--	--	Molecular Function: electron carrier activity (GO:0009055);; Molecular Function: protein disulfide oxidoreductase activity (GO:0015035);; Biological Process: cell redox homeostasis (GO:0045454);;	K17479|4.65374e-135|brp:103855677|uncharacterized protein At3g28850-like; K17479 glutaredoxin domain-containing cysteine-rich protein 1 (A)
RSG00844	0.000529288	12.5778	15.6504	12.5529	19.4391	0.0112412	0.000578556	1.44576	3.54531	0.942096	0.218076	normal	0.181571	2.42331	normal	0.204777	2.65537	normal	Molecular Function: nucleic acid binding (GO:0003676);; Cellular Component: nucleus (GO:0005634);; Cellular Component: vacuolar membrane (GO:0005774);; Biological Process: nucleobase-containing compound metabolic process (GO:0006139);; Molecular Function: 3'-5' exonuclease activity (GO:0008408);;	--
RSG00845	2.60309	2.32481	1.71973	1.47168	1.47785	1.55003	0.321291	0.485081	0.469872	0.437822	-0.558972	normal	0.000152792	2.48351	up	0.0068891	1.94452	up	Cellular Component: nucleus (GO:0005634);; Cellular Component: mitochondrion (GO:0005739);;	K04082|3.4293e-150|brp:103855674|iron-sulfur cluster co-chaperone protein HscB, mitochondrial-like; K04082 molecular chaperone HscB (A)
RSG00846	3.07934	2.08102	1.91693	0.000514837	0.00169502	2.58172	1.52423	1.55243	0.320459	0.326534	-1.4222	normal	0.208465	1.03223	normal	0.905424	-0.361464	normal	Cellular Component: extracellular region (GO:0005576);; Cellular Component: vacuole (GO:0005773);; Biological Process: cell adhesion (GO:0007155);;	--
RSG00847	229.148	203.416	225.68	469.092	411.407	393.648	674.756	604.809	490.948	0.000412535	0.987093	normal	1.97718e-06	-1.46912	down	0.189643	-0.463147	normal	Biological Process: fatty acid beta-oxidation (GO:0006635);; Biological Process: hormone-mediated signaling pathway (GO:0009755);;	--
RSG00849	6.03791	14.5178	1.78249	4.39247	11.3104	9.68932	10.7402	21.5719	16.3843	0.925743	0.193516	normal	0.153565	-1.11508	normal	0.108756	-0.894326	normal	Cellular Component: mitochondrion (GO:0005739);; Cellular Component: vacuolar membrane (GO:0005774);; Cellular Component: Golgi apparatus (GO:0005794);; Cellular Component: plasma membrane (GO:0005886);; Cellular Component: plasmodesma (GO:0009506);; Cellular Component: chloroplast (GO:0009507);; Biological Process: defense response to bacterium (GO:0042742);; Biological Process: defense response…	--
RSG00850	0.0299788	0.0314699	0	0	0.0801428	0	0	0	0	--	--	--	--	--	--	--	--	--	--	--
RSG00851	3.07939	10.2625	8.84842	10.4407	12.9266	7.29848	5.39793	10.9488	5.69907	0.721386	0.530144	normal	0.975437	-0.0855064	normal	0.694504	0.471445	normal	Cellular Component: mitochondrion (GO:0005739);;	--
RSG00852	0	0	0	0	0	0	0	0	0	--	--	--	--	--	--	--	--	--	--	--
RSG00853	2.07422	0.517598	5.46377	8.22608	4.99913	2.85015	13.8392	3.08876	30.406	--	--	--	0.158037	-2.6331	normal	0.380369	-1.57356	normal	Cellular Component: nucleus (GO:0005634);;	--
RSG00854	133.4	129.001	90.3998	103.335	124.197	129.818	79.1363	107.842	81.725	0.995009	0.0106634	normal	0.295268	0.401709	normal	0.270966	0.434177	normal	Biological Process: ribosomal small subunit assembly (GO:0000028);; Molecular Function: structural constituent of ribosome (GO:0003735);; Cellular Component: Golgi apparatus (GO:0005794);; Biological Process: translational elongation (GO:0006414);; Cellular Component: cytosolic small ribosomal subunit (GO:0022627);;	K02962|6.76128e-92|brp:103855666|40S ribosomal protein S17-4-like; K02962 small subunit ribosomal protein S17e (A)
RSG00855	3.02157e-07	0.104576	0	0	1.98046e-06	0	0	5.85206e-06	0	--	--	--	--	--	--	--	--	--	--	--
RSG00856	0.41993	1.60098	0.553317	0.12807	0.698027	0.146331	0.663563	2.18849	0	--	--	--	0.976204	-0.148004	normal	--	--	--	Molecular Function: DNA binding (GO:0003677);; Molecular Function: sequence-specific DNA binding transcription factor activity (GO:0003700);; Cellular Component: nucleus (GO:0005634);; Biological Process: fatty acid catabolic process (GO:0009062);; Biological Process: meristem maintenance (GO:0010073);; Biological Process: leaf shaping (GO:0010358);; Biological Process: negative regulation of tra…	--
RSG00857	18.195	17.1336	19.0029	12.7293	12.2374	13.6816	11.4641	14.6203	10.2655	0.168368	-0.457128	normal	0.0716873	0.564013	normal	0.781043	0.128248	normal	Cellular Component: chloroplast envelope (GO:0009941);;	--
RSG00858	1.03743	1.59587	0.570352	0	0.54906	0	26.8481	14.2629	20.0671	--	--	--	7.27503e-15	-3.89936	down	3.01554e-30	-8.03885	down	Cellular Component: vacuole (GO:0005773);; Cellular Component: integral component of plasma membrane (GO:0005887);; Biological Process: oligopeptide transport (GO:0006857);; Molecular Function: sucrose:proton symporter activity (GO:0008506);; Cellular Component: plasmodesma (GO:0009506);; Biological Process: response to nematode (GO:0009624);; Biological Process: pollen germination (GO:0009846);;…	K15378|0|brp:103855660|putative sucrose transport protein SUC6; K15378 solute carrier family 45, member 1/2/4 (A)
RSG00859	0.859136	1.52381	0.422485	0.832428	0.640686	1.9085	0.737194	1.99721	0.694601	0.857227	0.306588	normal	0.83185	-0.27876	normal	0.991087	0.0563336	normal	Biological Process: mitotic G2 phase (GO:0000085);; Biological Process: karyogamy (GO:0000741);; Molecular Function: nucleic acid binding (GO:0003676);; Cellular Component: nucleus (GO:0005634);; Cellular Component: cytosol (GO:0005829);; Biological Process: mitotic recombination (GO:0006312);; Biological Process: mRNA export from nucleus (GO:0006406);; Molecular Function: zinc ion binding (GO:00…	K12827|0|brp:103855659|splicing factor 3A subunit 3-like; K12827 splicing factor 3A subunit 3 (A)
RSG00860	53.2845	42.389	42.9803	17.6211	6.78389	27.8292	9.8292	14.6614	6.0388	8.29581e-05	-1.43702	down	8.53197e-16	2.26489	up	0.403253	0.849664	normal	Molecular Function: nucleotide binding (GO:0000166);; Biological Process: karyogamy (GO:0000741);; Cellular Component: nucleolus (GO:0005730);; Biological Process: rRNA processing (GO:0006364);; Biological Process: embryo sac egg cell differentiation (GO:0009560);; Cellular Component: Cul4-RING E3 ubiquitin ligase complex (GO:0080008);;	K14549|0|brp:103855657|U3 small nucleolar RNA-associated protein 15 homolog; K14549 U3 small nucleolar RNA-associated protein 15 (A)
RSG00861	0.150682	2.82429	1.44748	1.71337	2.39603	1.34451	0.715447	0.471421	0.48609	0.840513	0.344508	normal	0.381845	1.45893	normal	0.0317509	1.82194	normal	Biological Process: regulation of cyclin-dependent protein serine/threonine kinase activity (GO:0000079);; Biological Process: nuclear division (GO:0000280);; Biological Process: cytokinesis by cell plate formation (GO:0000911);; Cellular Component: nucleus (GO:0005634);; Cellular Component: cytoplasm (GO:0005737);; Biological Process: regulation of DNA replication (GO:0006275);; Biological Proce…	K05868|0|brp:103855656|cyclin-B1-2-like; K05868 cyclin B (A)
RSG00862	3.3406	10.2627	7.6837	0.110276	1.20382	1.74307	1.3813	1.68959	2.67599	0.00834858	-2.79046	down	0.0251403	1.89407	normal	0.433702	-0.873812	normal	Cellular Component: cytoplasm (GO:0005737);; Molecular Function: sulfotransferase activity (GO:0008146);;	--
RSG00863	5.03119e-05	6.88798e-05	2.77329e-05	0.000183088	0.000647285	2.02497e-05	5.20268e-05	5.31973e-05	7.85057e-05	--	--	--	--	--	--	--	--	--	Cellular Component: nucleus (GO:0005634);; Biological Process: protein folding (GO:0006457);;	K09522|3.04759e-158|brp:103855651|dnaJ homolog subfamily C member 2-like; K09522 DnaJ homolog subfamily C member 2 (A)
RSG00864	0.000761768	0.000250144	4.95656e-05	0.000131184	0.000398198	1.43541	0.000106799	0.322265	1.45558	--	--	--	--	--	--	0.950687	-0.302568	normal	Cellular Component: nucleus (GO:0005634);; Biological Process: protein folding (GO:0006457);;	K09522|9.74364e-155|brp:103855651|dnaJ homolog subfamily C member 2-like; K09522 DnaJ homolog subfamily C member 2 (A)
RSG00865	0	0	0	0	0	0	0	0	0	--	--	--	--	--	--	--	--	--	Molecular Function: nucleic acid binding (GO:0003676);; Molecular Function: sequence-specific DNA binding transcription factor activity (GO:0003700);; Cellular Component: nucleus (GO:0005634);; Biological Process: regulation of transcription, DNA-templated (GO:0006355);; Molecular Function: zinc ion binding (GO:0008270);; Biological Process: response to cold (GO:0009409);; Biological Process: reg…	--
RSG00866	0	0	0	0	0	0	0	0.0645275	0	--	--	--	--	--	--	--	--	--	--	--
RSG00867	0.0875786	0.369987	0.108631	0.569338	0.576746	0.542061	0.0762191	0.213223	0.095442	0.24103	1.65416	normal	--	--	--	0.0512367	2.25765	normal	Cellular Component: mitochondrion (GO:0005739);; Cellular Component: endoplasmic reticulum (GO:0005783);; Biological Process: vesicle-mediated transport (GO:0016192);;	--
RSG00868	0	0	0	0	0.0707729	0	0	0	0	--	--	--	--	--	--	--	--	--	Cellular Component: nucleus (GO:0005634);; Biological Process: DNA repair (GO:0006281);; Biological Process: DNA recombination (GO:0006310);; Molecular Function: UDP-glycosyltransferase activity (GO:0008194);; Molecular Function: transferase activity, transferring hexosyl groups (GO:0016758);; Biological Process: response to arsenic-containing substance (GO:0046685);;	--
RSG00869	15.6417	14.4403	14.9349	16.2203	15.4971	18.0168	11.7685	15.164	10.5369	0.751799	0.172459	normal	0.571955	0.254514	normal	0.284229	0.448457	normal	Cellular Component: cytosol (GO:0005829);; Cellular Component: proteasome regulatory particle, lid subcomplex (GO:0008541);; Biological Process: leaf morphogenesis (GO:0009965);; Biological Process: DNA endoreduplication (GO:0042023);; Biological Process: proteasome-mediated ubiquitin-dependent protein catabolic process (GO:0043161);; Biological Process: regulation of unidimensional cell growth (…	K03038|0|eus:EUTSA_v10014182mg|hypothetical protein; K03038 26S proteasome regulatory subunit N8 (A)
RSG00870	7.75741	6.63318	9.22912	10.4505	7.89614	8.91236	7.77883	8.24961	8.45002	0.638965	0.227018	normal	0.914701	-0.0573719	normal	0.682267	0.186097	normal	Molecular Function: metalloendopeptidase activity (GO:0004222);; Biological Process: proteolysis (GO:0006508);; Biological Process: phosphatidylglycerol biosynthetic process (GO:0006655);; Cellular Component: chloroplast thylakoid membrane (GO:0009535);; Biological Process: embryo development ending in seed dormancy (GO:0009793);; Biological Process: thylakoid membrane organization (GO:0010027);;…	--
RSG00871	9.34026	7.24769	9.49837	18.9231	12.9399	16.4621	12.3003	28.7292	12.3914	0.00491133	0.90623	normal	0.197775	-1.02987	normal	0.911592	-0.0992804	normal	Biological Process: sulfate assimilation (GO:0000103);; Biological Process: tryptophan biosynthetic process (GO:0000162);; Biological Process: MAPK cascade (GO:0000165);; Molecular Function: anthranilate synthase activity (GO:0004049);; Molecular Function: sulfate adenylyltransferase (ATP) activity (GO:0004781);; Cellular Component: cytosol (GO:0005829);; Cellular Component: anthranilate synthase…	K01657|0|brp:103855638|anthranilate synthase alpha subunit 1, chloroplastic; K01657 anthranilate synthase component I [EC:4.1.3.27] (A)
RSG00872	0	0	0	0	0	0	0	0	0	--	--	--	--	--	--	--	--	--	Biological Process: polysaccharide biosynthetic process (GO:0000271);; Molecular Function: monooxygenase activity (GO:0004497);; Molecular Function: iron ion binding (GO:0005506);; Cellular Component: mitochondrion (GO:0005739);; Molecular Function: electron carrier activity (GO:0009055);; Biological Process: multidimensional cell growth (GO:0009825);; Biological Process: positive regulation of f…	K09588|0|brp:103855637|cytochrome P450 90A1-like; K09588 cytochrome P450, family 90, subfamily A, polypeptide 1 [EC:1.14.-.-] (A)
RSG00873	9.17134	7.41774	14.1726	11.657	7.55427	8.8868	23.0474	20.2061	17.7088	0.745482	-0.229723	normal	0.0553247	-0.824959	normal	0.0134854	-1.03812	normal	--	--
RSG00874	0	0	0	0	0	0	0	0	0	--	--	--	--	--	--	--	--	--	Molecular Function: binding (GO:0005488);;	--
RSG00875	0.26307	0.581801	0.397011	0.0792744	0.343437	0	1.68338	1.32382	0.502015	--	--	--	0.163019	-1.56343	normal	0.0141313	-3.1137	normal	Molecular Function: iron ion binding (GO:0005506);; Cellular Component: cytoplasm (GO:0005737);; Biological Process: response to wounding (GO:0009611);; Biological Process: response to fungus (GO:0009620);; Biological Process: jasmonic acid biosynthetic process (GO:0009695);; Biological Process: jasmonic acid mediated signaling pathway (GO:0009867);; Molecular Function: oxidoreductase activity, a…	--
RSG00876	0	0	0	0	0	0	0	0.187293	0	--	--	--	--	--	--	--	--	--	Cellular Component: nucleus (GO:0005634);; Molecular Function: zinc ion binding (GO:0008270);;	--
RSG00877	0	0	0	0	0	0	0	0.102589	0	--	--	--	--	--	--	--	--	--	--	--
RSG00878	0	0	0	0	0	0	0	0	0	--	--	--	--	--	--	--	--	--	--	--
RSG00879	0	0.0887374	0	0	0	0	0	0	0	--	--	--	--	--	--	--	--	--	--	--
RSG00880	3.32964	3.4963	3.84472	2.1573	1.57623	2.12269	4.54561	4.66869	3.72295	0.0143215	-0.85649	normal	0.477662	-0.278216	normal	0.00110879	-1.11651	down	Molecular Function: ubiquitin-protein transferase activity (GO:0004842);; Cellular Component: anaphase-promoting complex (GO:0005680);; Biological Process: double-strand break repair (GO:0006302);; Biological Process: mitotic recombination (GO:0006312);; Biological Process: sister chromatid cohesion (GO:0007062);; Biological Process: synapsis (GO:0007129);; Biological Process: reciprocal meiotic …	K03348|0|brp:103855632|anaphase-promoting complex subunit 1-like; K03348 anaphase-promoting complex subunit 1 (A)
RSG00881	0.101357	0.211499	0	0.882369	0.40991	1.29642	0	0	0	--	--	--	--	--	--	--	--	--	Cellular Component: nucleus (GO:0005634);; Biological Process: ribosome biogenesis (GO:0042254);;	K06961|1.85281e-82|brp:103855441|KRR1 small subunit processome component homolog; K06961 ribosomal RNA assembly protein (A)
RSG00882	28.9513	19.8959	34.2725	25.4464	22.1254	29.892	27.8477	21.64	26.2338	0.853238	-0.106719	normal	0.661998	0.164919	normal	0.87473	0.074218	normal	Cellular Component: nucleus (GO:0005634);; Cellular Component: vacuole (GO:0005773);;	--
RSG00883	0	0	0	0	0	0	0	0	0	--	--	--	--	--	--	--	--	--	--	--
RSG00884	1.03162	1.7801	0.564651	1.38746	1.45587	0.863529	2.07265	1.3319	0.589155	0.882296	0.195425	normal	0.78347	-0.298875	normal	0.950933	-0.0822618	normal	Cellular Component: vacuole (GO:0005773);; Biological Process: N-glycan processing (GO:0006491);; Biological Process: protein deglycosylation (GO:0006517);; Molecular Function: mannosyl-glycoprotein endo-beta-N-acetylglucosaminidase activity (GO:0033925);;	K01227|0|brp:103855628|cytosolic endo-beta-N-acetylglucosaminidase; K01227 mannosyl-glycoprotein endo-beta-N-acetylglucosaminidase [EC:3.2.1.96] (A)
RSG00885	2.07991	3.98833	2.25473	7.34436	10.3967	7.28084	10.6147	12.2991	8.79571	0.0208135	1.60016	normal	0.00197399	-1.95487	down	0.637299	-0.331554	normal	Molecular Function: receptor activity (GO:0004872);; Molecular Function: protein binding (GO:0005515);; Cellular Component: nucleus (GO:0005634);; Cellular Component: cytoplasm (GO:0005737);; Biological Process: abscisic acid-activated signaling pathway (GO:0009738);; Molecular Function: abscisic acid binding (GO:0010427);;	K14496|2.64377e-143|brp:103855626|abscisic acid receptor PYL5-like; K14496 abscisic acid receptor PYR/PYL family (A)
RSG00886	4.03486e-07	1.81731e-06	3.62073e-08	0.143962	8.6501e-06	0	8.68803e-06	0.0943062	0	--	--	--	--	--	--	--	--	--	Molecular Function: DNA binding (GO:0003677);; Molecular Function: sequence-specific DNA binding transcription factor activity (GO:0003700);; Molecular Function: protein binding (GO:0005515);; Cellular Component: nucleus (GO:0005634);; Biological Process: regulation of transcription, DNA-templated (GO:0006355);; Biological Process: protein folding (GO:0006457);; Biological Process: response to wa…	K09286|2.28967e-154|brp:103855625|dehydration-responsive element-binding protein 2A-like; K09286 EREBP-like factor (A)
RSG00887	314.929	279.103	472.07	237.84	216.145	199.283	200.567	245.416	340.679	0.131311	-0.695574	normal	0.510071	0.348256	normal	0.518257	-0.332679	normal	Cellular Component: mitochondrial respiratory chain complex III (GO:0005750);; Molecular Function: ubiquinol-cytochrome-c reductase activity (GO:0008121);; Biological Process: photorespiration (GO:0009853);;	--
RSG00888	9.32989	8.24982	13.1807	6.34253	7.35227	12.4955	4.24314	5.69049	7.38831	0.796723	-0.206556	normal	0.0765554	0.838206	normal	0.289176	0.650035	normal	Molecular Function: protein serine/threonine phosphatase activity (GO:0004722);; Cellular Component: nucleus (GO:0005634);; Cellular Component: cytosol (GO:0005829);; Cellular Component: plasma membrane (GO:0005886);;	K04382|2.7715e-22|zma:100283817|PP2Ac-2 - Phosphatase 2A isoform 2 belonging to family 2; K04382 serine/threonine-protein phosphatase 2A catalytic subunit [EC:3.1.3.16] (A)
RSG00889	0	0	0	0	0	0	0	0	0	--	--	--	--	--	--	--	--	--	--	--
RSG00890	0.420705	4.24671	1.11486	0.314972	1.61755	0.118044	0.960057	0.177045	0.732993	0.609436	-1.58749	normal	--	--	--	--	--	--	Molecular Function: peroxidase activity (GO:0004601);; Molecular Function: protein binding (GO:0005515);; Cellular Component: cell wall (GO:0005618);; Cellular Component: Golgi apparatus (GO:0005794);; Cellular Component: cytosol (GO:0005829);; Molecular Function: heme binding (GO:0020037);; Biological Process: hydrogen peroxide catabolic process (GO:0042744);; Molecular Function: metal ion bindi…	K00430|7.278e-171|brp:103855623|peroxidase 52-like; K00430 peroxidase [EC:1.11.1.7] (A)
RSG00891	26.3303	23.1503	20.0303	17.4207	14.4524	23.7568	10.839	16.7882	12.1052	0.34879	-0.350384	normal	0.00513903	0.887469	normal	0.170117	0.558437	normal	Cellular Component: cytoplasm (GO:0005737);;	--
RSG00892	2.61302	1.99663	2.44074	2.3855	2.70282	3.49376	1.95087	2.54176	1.86594	0.587388	0.404956	normal	0.917985	0.0947911	normal	0.415938	0.52278	normal	Biological Process: maltose metabolic process (GO:0000023);; Cellular Component: plasma membrane (GO:0005886);; Cellular Component: plastoglobule (GO:0010287);; Biological Process: chlorophyll catabolic process (GO:0015996);; Molecular Function: transferase activity, transferring phosphorus-containing groups (GO:0016772);; Biological Process: starch biosynthetic process (GO:0019252);; Biological …	K08869|0|brp:103855619|uncharacterized aarF domain-containing protein kinase At5g05200, chloroplastic-like; K08869 aarF domain-containing kinase (A)
RSG00893	6.94765	2.98041	3.22456	5.21895	7.29055	7.31026	4.1268	5.14846	5.67209	0.527857	0.635522	normal	0.847608	-0.214995	normal	0.628622	0.440984	normal	Biological Process: response to molecule of bacterial origin (GO:0002237);; Biological Process: respiratory burst involved in defense response (GO:0002679);; Cellular Component: nucleus (GO:0005634);; Biological Process: response to chitin (GO:0010200);;	--
RSG00894	1.80442	6.93493	1.01769	5.65059	6.92224	1.32804	8.85215	5.59307	4.17386	0.792241	0.538244	normal	0.385626	-0.906494	normal	0.757887	-0.347832	normal	Biological Process: nucleotide biosynthetic process (GO:0009165);;	--
RSG00895	68.9699	79.9693	64.3663	50.2849	48.1835	38.5374	126.175	95.0108	100.796	0.0387803	-0.628014	normal	0.0917311	-0.57238	normal	6.65944e-05	-1.18332	down	Cellular Component: endosome (GO:0005768);; Cellular Component: Golgi apparatus (GO:0005794);; Cellular Component: trans-Golgi network (GO:0005802);; Cellular Component: plasma membrane (GO:0005886);; Biological Process: glycolytic process (GO:0006096);; Biological Process: calcium ion transport (GO:0006816);; Biological Process: water transport (GO:0006833);; Biological Process: defense response…	K10999|0|brp:103855617|cellulose synthase A catalytic subunit 3 [UDP-forming]; K10999 cellulose synthase A [EC:2.4.1.12] (A)
RSG00896	0	0	0	0	0	0	0.134984	0	0.394479	--	--	--	--	--	--	--	--	--	Biological Process: purine nucleobase transport (GO:0006863);; Biological Process: autophagy (GO:0006914);; Cellular Component: organelle membrane (GO:0031090);; Biological Process: response to starvation (GO:0042594);; Molecular Function: phosphatidylinositol-3,5-bisphosphate binding (GO:0080025);;	--
RSG00897	0	0	0	0	0	0	0	0	0	--	--	--	--	--	--	--	--	--	Molecular Function: oxygen binding (GO:0019825);;	--
RSG00898	0	0	0	0	0	0	0	0	0	--	--	--	--	--	--	--	--	--	Molecular Function: metal ion binding (GO:0046872);;	--
RSG00899	2.96222	3.66724	3.01333	4.34201	3.53111	3.55861	9.41611	7.46126	8.71504	0.765011	0.246919	normal	0.00109806	-1.43333	down	0.00666519	-1.17095	down	Molecular Function: DNA binding (GO:0003677);; Cellular Component: nucleus (GO:0005634);; Biological Process: regulation of transcription, DNA-templated (GO:0006355);; Biological Process: response to wounding (GO:0009611);; Biological Process: response to fungus (GO:0009620);; Biological Process: jasmonic acid biosynthetic process (GO:0009695);; Biological Process: response to jasmonic acid (GO:0…	--
RSG00900	2.826	7.32235	3.73135	7.03331	8.63207	5.84431	5.70586	8.36212	8.06494	0.356573	0.681413	normal	0.316976	-0.677825	normal	0.992943	0.0240473	normal	Molecular Function: cysteine-type endopeptidase inhibitor activity (GO:0004869);; Cellular Component: extracellular region (GO:0005576);; Cellular Component: endoplasmic reticulum (GO:0005783);; Cellular Component: cytosol (GO:0005829);; Biological Process: hyperosmotic response (GO:0006972);; Biological Process: response to oxidative stress (GO:0006979);; Biological Process: response to cold (GO…	--
RSG00901	21.5835	19.6226	18.6642	20.1461	23.0554	23.4686	30.4326	35.4798	37.0862	0.754787	0.166119	normal	0.0262414	-0.756293	normal	0.113602	-0.570708	normal	Molecular Function: nucleic acid binding (GO:0003676);; Cellular Component: nucleus (GO:0005634);; Cellular Component: cytoplasm (GO:0005737);;	--
RSG00902	1.2305	2.30199	0	0.876871	1.88689	1.00685	5.51515	3.51529	4.30588	1	0.0494703	normal	0.0181985	-1.9025	normal	0.0210293	-1.83178	normal	Molecular Function: DNA binding (GO:0003677);; Molecular Function: chromatin binding (GO:0003682);; Molecular Function: sequence-specific DNA binding transcription factor activity (GO:0003700);; Cellular Component: nucleus (GO:0005634);; Biological Process: regulation of transcription, DNA-templated (GO:0006355);;	--
RSG00903	24.4784	27.6605	24.3178	35.1352	35.1496	29.2277	31.7697	26.5584	30.6594	0.428437	0.315855	normal	0.58792	-0.212877	normal	0.793351	0.120763	normal	Molecular Function: ubiquitin-protein transferase activity (GO:0004842);; Biological Process: ubiquitin-dependent protein catabolic process (GO:0006511);; Biological Process: protein ubiquitination (GO:0016567);;	K10583|7.93873e-158|brp:103855606|ubiquitin-conjugating enzyme E2 22; K10583 ubiquitin-conjugating enzyme E2 S [EC:6.3.2.19] (A)
RSG00904	7.73758	8.43789	7.58646	6.72543	4.82756	8.00676	4.29174	3.9138	2.83077	0.60422	-0.271574	normal	0.00618012	1.12252	up	0.0457874	0.869476	normal	Cellular Component: cytosol (GO:0005829);; Biological Process: N-terminal protein myristoylation (GO:0006499);; Biological Process: intracellular protein transport (GO:0006886);; Biological Process: retrograde vesicle-mediated transport, Golgi to ER (GO:0006890);; Cellular Component: plasmodesma (GO:0009506);; Cellular Component: COPI vesicle coat (GO:0030126);; Cellular Component: clathrin adapt…	--
RSG00905	24.5239	23.6975	23.6305	19.8944	16.8505	19.9609	28.511	27.6776	23.2729	0.423686	-0.326602	normal	0.61782	-0.196363	normal	0.164891	-0.503701	normal	Cellular Component: cytoplasm (GO:0005737);; Molecular Function: hydrolase activity (GO:0016787);; Biological Process: inositol trisphosphate metabolic process (GO:0032957);; Biological Process: phosphatidylinositol phosphorylation (GO:0046854);; Biological Process: inositol phosphate dephosphorylation (GO:0046855);; Biological Process: phosphatidylinositol dephosphorylation (GO:0046856);;	--
RSG00906	0.563024	2.4565	0.178829	0.823906	2.46497	0.300609	0.0453952	0.147571	0.0766261	0.969617	0.160786	normal	--	--	--	0.10562	4.09774	normal	Molecular Function: enzyme inhibitor activity (GO:0004857);; Cellular Component: extracellular region (GO:0005576);; Cellular Component: plant-type cell wall (GO:0009505);; Biological Process: sterol biosynthetic process (GO:0016126);; Molecular Function: pectinesterase activity (GO:0030599);; Biological Process: cell wall modification (GO:0042545);; Biological Process: negative regulation of cat…	K01051|0|brp:103855601|probable pectinesterase/pectinesterase inhibitor 47; K01051 pectinesterase [EC:3.1.1.11] (A)
RSG00907	0	0.922291	0.399645	0.0428613	0.0467633	0	0	0	0	--	--	--	--	--	--	--	--	--	Molecular Function: enzyme inhibitor activity (GO:0004857);; Cellular Component: mitochondrion (GO:0005739);; Cellular Component: plant-type cell wall (GO:0009505);; Biological Process: trichoblast differentiation (GO:0010054);; Molecular Function: pectinesterase activity (GO:0030599);; Biological Process: cell wall modification (GO:0042545);; Biological Process: negative regulation of catalytic …	--
RSG00908	0.962272	0.114381	0.283051	0.131731	0.291388	0.147404	0.668265	0.762346	1.56047	--	--	--	--	--	--	--	--	--	Biological Process: pollen development (GO:0009555);; Biological Process: pollen tube growth (GO:0009860);; Biological Process: response to zinc ion (GO:0010043);; Biological Process: phloem transport (GO:0010233);; Molecular Function: nicotianamine synthase activity (GO:0030410);; Biological Process: nicotianamine biosynthetic process (GO:0030418);; Biological Process: cellular response to iron …	K05953|0|brp:103855599|nicotianamine synthase 1; K05953 nicotianamine synthase [EC:2.5.1.43] (A)
RSG00909	5.38355	5.77242	4.61769	0.0011746	0.824935	1.76797	4.7264	3.58426	3.85466	3.17234e-09	-2.61627	down	0.435169	0.386027	normal	1.11253e-05	-2.20507	down	Cellular Component: nucleus (GO:0005634);; Cellular Component: chromosome (GO:0005694);; Molecular Function: zinc ion binding (GO:0008270);; Molecular Function: histone-lysine N-methyltransferase activity (GO:0018024);; Biological Process: histone lysine methylation (GO:0034968);; Biological Process: regulation of gene expression, epigenetic (GO:0040029);; Molecular Function: histone binding (GO:…	K11420|0|brp:103855596|histone-lysine N-methyltransferase, H3 lysine-9 specific SUVH1-like; K11420 euchromatic histone-lysine N-methyltransferase [EC:2.1.1.43] (A)
RSG00910	6.88781	8.9523	5.81833	9.3713	8.90842	7.88362	14.5866	15.5796	9.87191	0.457204	0.297092	normal	0.00664423	-0.873469	normal	0.0965204	-0.555335	normal	Molecular Function: magnesium ion binding (GO:0000287);; Molecular Function: phospholipid-translocating ATPase activity (GO:0004012);; Molecular Function: protein binding (GO:0005515);; Molecular Function: ATP binding (GO:0005524);; Cellular Component: plasma membrane (GO:0005886);; Biological Process: protein targeting to membrane (GO:0006612);; Biological Process: cation transport (GO:0006812);…	K14802|0|brp:103855595|phospholipid-transporting ATPase 1-like; K14802 phospholipid-transporting ATPase [EC:3.6.3.1] (A)
RSG00911	0	0	0	0	0	0	0	0	0	--	--	--	--	--	--	--	--	--	--	--
RSG00912	0	0	0	0	0	0	0	0	0	--	--	--	--	--	--	--	--	--	--	--
RSG00913	0	0	0	0	0	0	0	0	0	--	--	--	--	--	--	--	--	--	--	--
RSG00914	3.97405	3.75746	4.67033	5.50038	10.7446	6.14588	6.03897	8.32764	4.73897	0.207195	1.01765	normal	0.262158	-0.521813	normal	0.49113	0.523967	normal	Biological Process: defense response to insect (GO:0002213);; Molecular Function: glutamate-cysteine ligase activity (GO:0004357);; Molecular Function: ATP binding (GO:0005524);; Biological Process: gluconeogenesis (GO:0006094);; Biological Process: glycolytic process (GO:0006096);; Biological Process: glutathione biosynthetic process (GO:0006750);; Biological Process: response to heat (GO:000940…	K01919|0|eus:EUTSA_v10024916mg|hypothetical protein; K01919 glutamate--cysteine ligase [EC:6.3.2.2] (A)
RSG00915	0	0.224508	0	0	0.0543561	0	0	0	0	--	--	--	--	--	--	--	--	--	Molecular Function: glutamate-cysteine ligase activity (GO:0004357);; Biological Process: glutathione biosynthetic process (GO:0006750);;	K01919|0|brp:103861359|glutamate--cysteine ligase, chloroplastic-like; K01919 glutamate--cysteine ligase [EC:6.3.2.2] (A)
RSG00916	0	0	0	0	0	0	0	0.109929	0.113476	--	--	--	--	--	--	--	--	--	Cellular Component: extracellular region (GO:0005576);;	--
RSG00917	0	0	0	0	0	0	0	0	0	--	--	--	--	--	--	--	--	--	--	--
RSG00918	0	0	0	0	0	0	0	0	0	--	--	--	--	--	--	--	--	--	--	--
RSG00919	10.5365	11.0635	12.3317	12.8837	12.8787	10.2664	15.6164	14.4616	12.0762	0.845753	0.102196	normal	0.365397	-0.320185	normal	0.631643	-0.19864	normal	Molecular Function: protein serine/threonine kinase activity (GO:0004674);; Molecular Function: protein tyrosine kinase activity (GO:0004713);; Molecular Function: ATP binding (GO:0005524);; Cellular Component: plasma membrane (GO:0005886);; Biological Process: protein phosphorylation (GO:0006468);; Biological Process: transmembrane receptor protein tyrosine kinase signaling pathway (GO:0007169);;	--
RSG00920	87.8986	63.3864	155.248	70.2173	46.2445	83.6784	49.6837	38.1084	42.8988	0.477003	-0.326769	normal	0.0176449	0.77217	normal	0.181057	0.461342	normal	Biological Process: RNA methylation (GO:0001510);; Molecular Function: structural constituent of ribosome (GO:0003735);; Cellular Component: cell wall (GO:0005618);; Cellular Component: mitochondrion (GO:0005739);; Cellular Component: vacuolar membrane (GO:0005774);; Cellular Component: Golgi apparatus (GO:0005794);; Cellular Component: plasma membrane (GO:0005886);; Biological Process: translati…	K02957|9.11879e-90|brp:103845407|40S ribosomal protein S15a; K02957 small subunit ribosomal protein S15Ae (A)
RSG00921	91.8664	105.417	91.3512	86.7559	77.5119	69.6769	65.5237	46.001	64.2425	0.386244	-0.311222	normal	0.00807594	0.774677	normal	0.144061	0.47824	normal	Molecular Function: copper ion binding (GO:0005507);; Cellular Component: Golgi apparatus (GO:0005794);; Cellular Component: cytosol (GO:0005829);; Molecular Function: zinc ion binding (GO:0008270);; Cellular Component: plasmodesma (GO:0009506);; Molecular Function: nutrient reservoir activity (GO:0045735);;	--
RSG00922	4.49148	3.14052	0.636833	3.49298	1.56829	0.657499	6.62828	4.29251	5.826	0.785628	-0.547366	normal	0.11653	-1.02388	normal	0.0158351	-1.56342	normal	Cellular Component: extracellular region (GO:0005576);; Cellular Component: mitochondrion (GO:0005739);;	--
RSG00923	0	0	0	0	0	0	0.0543591	0.178858	0	--	--	--	--	--	--	--	--	--	Cellular Component: exocyst (GO:0000145);; Biological Process: vesicle docking involved in exocytosis (GO:0006904);; Cellular Component: pollen tube (GO:0090406);;	K07195|0|brp:103871519|exocyst complex component EXO70B1; K07195 exocyst complex component 7 (A)
RSG00924	3.54073	2.01732	1.47558	6.23678	6.4074	4.85345	1.54275	1.4268	2.18066	0.013891	1.33951	normal	0.606341	0.450388	normal	0.000943358	1.80495	up	Biological Process: very long-chain fatty acid metabolic process (GO:0000038);; Cellular Component: extracellular region (GO:0005576);; Cellular Component: endoplasmic reticulum (GO:0005783);; Biological Process: fatty acid biosynthetic process (GO:0006633);; Biological Process: response to cold (GO:0009409);; Biological Process: response to light stimulus (GO:0009416);; Cellular Component: membr…	--
RSG00925	1.3025	2.74261	0.798728	2.49796	2.8112	1.20476	1.41801	1.31901	1.61846	0.568844	0.586109	normal	0.780142	0.267291	normal	0.144489	0.869315	normal	--	--
RSG00926	5.68323	3.54036	5.78397	3.8393	3.16259	4.07598	3.71587	3.43474	4.47017	0.527475	-0.397695	normal	0.563412	0.330417	normal	0.960163	-0.0516967	normal	Cellular Component: nucleus (GO:0005634);; Biological Process: regulation of transcription, DNA-templated (GO:0006355);; Cellular Component: chloroplast (GO:0009507);;	K12605|0|brp:103871522|probable NOT transcription complex subunit VIP2; K12605 CCR4-NOT transcription complex subunit 2 (A)
RSG00927	0	0	0	0	0	0.113493	0	0	0	--	--	--	--	--	--	--	--	--	--	--
RSG00928	9.00433	8.51016	0.644811	8.22602	11.2001	7.89666	25.3894	49.1365	32.7024	0.55592	0.628388	normal	2.5925e-05	-2.63337	down	0.000150509	-1.98035	down	--	--
RSG00929	0	0	0	0	0	0	0	0.244438	0	--	--	--	--	--	--	--	--	--	Cellular Component: extracellular region (GO:0005576);;	--
RSG00930	22.0452	21.7119	22.2796	27.2416	25.8592	32.1599	21.3854	20.7023	16.1718	0.282966	0.367123	normal	0.509299	0.2273	normal	0.0520134	0.614323	normal	Molecular Function: calcium-transporting ATPase activity (GO:0005388);; Molecular Function: ATP binding (GO:0005524);; Cellular Component: nucleus (GO:0005634);; Cellular Component: vacuolar membrane (GO:0005774);; Cellular Component: plasma membrane (GO:0005886);; Biological Process: ATP biosynthetic process (GO:0006754);; Biological Process: calcium ion transport (GO:0006816);; Biological Proce…	K01537|0|eus:EUTSA_v10006641mg|hypothetical protein; K01537 Ca2+transporting ATPase [EC:3.6.3.8] (A)
RSG00931	39.3612	56.7459	110.454	84.6796	50.046	50.1152	29.3126	24.1543	36.2241	0.997127	-0.0173677	normal	0.104911	1.22112	normal	0.0122296	1.21449	normal	Cellular Component: nucleosome (GO:0000786);; Molecular Function: DNA binding (GO:0003677);; Cellular Component: nucleolus (GO:0005730);; Cellular Component: vacuole (GO:0005773);; Biological Process: nucleosome assembly (GO:0006334);; Cellular Component: thylakoid (GO:0009579);; Molecular Function: protein heterodimerization activity (GO:0046982);;	K14838|8.9079e-51|zma:100282268|pco082380(357); LOC100282268; K11254 histone H4 (A)
RSG00932	45.7023	33.5694	41.4475	25.6562	14.7112	42.9401	16.9723	24.145	14.9871	0.0923653	-0.808285	normal	4.10588e-05	1.26241	up	0.575992	0.473981	normal	Cellular Component: Golgi apparatus (GO:0005794);; Molecular Function: transferase activity, transferring glycosyl groups (GO:0016757);;	--
RSG00933	5.07212	5.84844	3.69341	5.12225	6.66769	7.4607	6.24078	6.59023	7.57928	0.422577	0.414223	normal	0.287923	-0.490402	normal	0.934167	-0.0572215	normal	Molecular Function: protein serine/threonine kinase activity (GO:0004674);; Molecular Function: protein tyrosine kinase activity (GO:0004713);; Molecular Function: ATP binding (GO:0005524);; Cellular Component: nucleus (GO:0005634);; Cellular Component: plasma membrane (GO:0005886);; Biological Process: protein phosphorylation (GO:0006468);;	--
RSG00934	600.693	674.278	798.882	685.03	653.114	636.016	923.172	1127.13	827.646	0.922827	-0.0597533	normal	0.227786	-0.479887	normal	0.152174	-0.518829	normal	Cellular Component: cell wall (GO:0005618);; Cellular Component: Golgi apparatus (GO:0005794);; Cellular Component: cytosol (GO:0005829);; Cellular Component: plasma membrane (GO:0005886);; Biological Process: gluconeogenesis (GO:0006094);; Biological Process: glycolytic process (GO:0006096);; Biological Process: protein folding (GO:0006457);; Biological Process: N-terminal protein myristoylation…	K00434|2.14014e-156|brp:103871533|APX, apx1; L-ascorbate peroxidase 1, cytosolic-like; K00434 L-ascorbate peroxidase [EC:1.11.1.11] (A)
RSG00935	0.255825	0.261629	0	0	0	0	0	0	0	--	--	--	--	--	--	--	--	--	Cellular Component: nucleus (GO:0005634);; Cellular Component: mitochondrion (GO:0005739);;	--
RSG00936	2.41127	3.88122	1.53429	3.75657	3.77079	5.82218	2.87618	2.43643	2.61256	0.406785	0.804762	normal	0.979751	-0.0592281	normal	0.371076	0.762919	normal	--	--
RSG00937	15.9909	14.7965	16.4391	11.8132	10.6036	13.4679	8.10873	7.54188	6.95335	0.161937	-0.45527	normal	0.00163814	0.921441	normal	0.160539	0.485069	normal	Molecular Function: RNA ligase (ATP) activity (GO:0003972);; Molecular Function: 2',3'-cyclic-nucleotide 3'-phosphodiesterase activity (GO:0004113);; Molecular Function: ATP binding (GO:0005524);; Cellular Component: nucleus (GO:0005634);; Biological Process: tRNA splicing, via endonucleolytic cleavage and ligation (GO:0006388);; Molecular Function: polynucleotide 5'-hydroxyl-kinase activity (GO:…	--
RSG00939	48.7788	48.869	63.6741	35.0762	32.1998	31.3191	27.0712	35.8366	27.9764	0.100619	-0.665791	normal	0.0364922	0.840914	normal	0.737027	0.194885	normal	Biological Process: nuclear division (GO:0000280);; Biological Process: nucleolus organization (GO:0007000);; Cellular Component: chloroplast (GO:0009507);; Biological Process: cellulose biosynthetic process (GO:0030244);; Biological Process: cell redox homeostasis (GO:0045454);; Biological Process: Golgi vesicle transport (GO:0048193);;	K13984|1.63252e-69|brp:103871538|protein disulfide-isomerase 5-1; K13984 thioredoxin domain-containing protein 5 (A)
RSG00940	9.4957	4.96322	10.5347	6.31582	6.79216	6.291	8.49161	6.63294	5.46186	0.675679	-0.345563	normal	0.688195	0.285977	normal	0.978502	-0.0398683	normal	Cellular Component: mitochondrion (GO:0005739);;	--
RSG00941	620.732	607.185	445.097	497.651	218.029	875.243	347.245	864.579	245.246	0.97102	-0.0590387	normal	0.833366	0.194952	normal	0.924205	0.162625	normal	Molecular Function: translation elongation factor activity (GO:0003746);; Molecular Function: GTPase activity (GO:0003924);; Molecular Function: calmodulin binding (GO:0005516);; Molecular Function: GTP binding (GO:0005525);; Cellular Component: nucleolus (GO:0005730);; Cellular Component: mitochondrion (GO:0005739);; Cellular Component: vacuolar membrane (GO:0005774);; Cellular Component: Golgi …	K03231|0|aly:ARALYDRAFT_311847|T6D22.2; K03231 elongation factor 1-alpha (A)
RSG00942	5.70435	8.16034	3.36986	3.07074	2.67167	3.44109	2.86829	4.13414	2.34457	0.278386	-0.932911	normal	0.244415	0.907474	normal	1	-0.00307519	normal	Molecular Function: sequence-specific DNA binding transcription factor activity (GO:0003700);; Molecular Function: binding (GO:0005488);; Cellular Component: nucleus (GO:0005634);; Biological Process: post-translational protein modification (GO:0043687);; Biological Process: positive regulation of transcription, DNA-templated (GO:0045893);;	K03506|7.67686e-68|brp:103871543|chromatin accessibility complex protein 1; K03506 DNA polymerase epsilon subunit 4 [EC:2.7.7.7] (A)
RSG00943	10.3796	10.2585	16.1593	4.42617	6.22272	4.85872	9.28321	9.66541	18.8193	0.12024	-1.19185	normal	0.964786	-0.055675	normal	0.108079	-1.23217	normal	Cellular Component: mitochondrion (GO:0005739);;	--
RSG00944	21.593	17.8893	18.62	18.0731	21.3508	19.482	19.881	16.6543	19.4852	0.948963	0.0387596	normal	0.86316	0.0712234	normal	0.765113	0.128127	normal	Biological Process: nuclear-transcribed mRNA catabolic process (GO:0000956);; Biological Process: protein N-linked glycosylation (GO:0006487);;	K15501|0|brp:103871546|serine/threonine-protein phosphatase 6 regulatory subunit 3; K15501 serine/threonine-protein phosphatase 6 regulatory subunit 3 (A)
RSG00945	4.47455	4.00899	3.09512	6.85363	4.26857	3.48516	13.5813	11.6022	11.9577	0.643303	0.35489	normal	0.000269301	-1.59567	down	0.00421752	-1.22692	down	Molecular Function: sequence-specific DNA binding transcription factor activity (GO:0003700);; Molecular Function: binding (GO:0005488);; Cellular Component: nucleus (GO:0005634);;	--
RSG00946	6.66668	6.65054	7.81074	7.62332	8.50498	5.59706	11.762	9.34781	9.32417	0.998286	0.0112272	normal	0.17365	-0.525126	normal	0.213991	-0.495649	normal	Cellular Component: endosome (GO:0005768);; Cellular Component: Golgi apparatus (GO:0005794);; Cellular Component: trans-Golgi network (GO:0005802);; Biological Process: glucose catabolic process (GO:0006007);; Biological Process: protein glycosylation (GO:0006486);; Biological Process: regulation of mitotic cell cycle (GO:0007346);; Molecular Function: protein-tyrosine sulfotransferase activity …	--
RSG00948	0	0	0	0	0	0	0	0	0	--	--	--	--	--	--	--	--	--	Molecular Function: transferase activity, transferring hexosyl groups (GO:0016758);; Cellular Component: intrinsic component of endoplasmic reticulum membrane (GO:0031227);;	--
RSG00949	0.0805045	0.0510728	0	0.0597085	0.021294	0.275895	0	0.08448	0.0877534	--	--	--	--	--	--	--	--	--	Molecular Function: transferase activity, transferring hexosyl groups (GO:0016758);; Cellular Component: intrinsic component of endoplasmic reticulum membrane (GO:0031227);;	--
RSG00950	0.188704	0.797654	0.377008	0.232654	1.72288	0.306338	0.104024	0.67802	0.26476	0.795573	0.750818	normal	0.847148	0.345113	normal	0.645423	1.13949	normal	Biological Process: MAPK cascade (GO:0000165);; Molecular Function: ubiquitin-protein transferase activity (GO:0004842);; Cellular Component: extracellular region (GO:0005576);; Cellular Component: plasma membrane (GO:0005886);; Biological Process: N-terminal protein myristoylation (GO:0006499);; Biological Process: protein targeting to membrane (GO:0006612);; Molecular Function: zinc ion binding…	--
RSG00951	12.403	12.1438	16.8203	12.4919	12.7067	15.9423	12.2733	13.6198	14.8403	1	-0.000920853	normal	0.96972	0.0227744	normal	0.94951	0.0401064	normal	Cellular Component: nucleus (GO:0005634);; Cellular Component: endosome (GO:0005768);; Cellular Component: Golgi apparatus (GO:0005794);; Cellular Component: trans-Golgi network (GO:0005802);; Cellular Component: chloroplast (GO:0009507);; Molecular Function: transferase activity, transferring glycosyl groups (GO:0016757);;	--
RSG00952	0	0	0.0826279	0	0.0435907	0.0467539	0	0.034598	0.0715922	--	--	--	--	--	--	--	--	--	Biological Process: MAPK cascade (GO:0000165);; Molecular Function: ubiquitin-protein transferase activity (GO:0004842);; Cellular Component: extracellular region (GO:0005576);; Cellular Component: plasma membrane (GO:0005886);; Biological Process: N-terminal protein myristoylation (GO:0006499);; Biological Process: protein targeting to membrane (GO:0006612);; Molecular Function: zinc ion binding…	--
RSG00953	0.958507	1.10642	0.867727	0.808079	0.534203	1.3339	1.01464	1.12199	0.794515	0.90659	-0.112642	normal	0.996379	-0.011669	normal	0.892035	-0.105038	normal	Cellular Component: nucleus (GO:0005634);; Biological Process: maintenance of chromatin silencing (GO:0006344);; Biological Process: methylation (GO:0032259);; Molecular Function: protein homodimerization activity (GO:0042803);;	--
RSG00954	0	0	0	0	0	0	0	0	0.0951051	--	--	--	--	--	--	--	--	--	Molecular Function: carbonate dehydratase activity (GO:0004089);; Molecular Function: calcium-transporting ATPase activity (GO:0005388);; Molecular Function: calmodulin binding (GO:0005516);; Cellular Component: cytoplasm (GO:0005737);; Cellular Component: plasma membrane (GO:0005886);; Biological Process: one-carbon metabolic process (GO:0006730);; Biological Process: calcium ion transport (GO:0…	K01674|3.66138e-174|brp:103871553|alpha carbonic anhydrase 5; K01674 carbonic anhydrase [EC:4.2.1.1] (A)
RSG00955	7.62267	5.21313	7.50057	5.79703	5.646	4.79852	2.10837	3.53739	2.97718	0.539244	-0.313429	normal	0.0027747	1.23455	up	0.0323869	0.941742	normal	Cellular Component: chloroplast (GO:0009507);; Biological Process: chloroplast RNA processing (GO:0031425);;	--
RSG00956	0.233429	0.0821218	0.193588	0	0.100392	0	0.306978	0.49962	0	--	--	--	--	--	--	--	--	--	Molecular Function: carbonate dehydratase activity (GO:0004089);; Molecular Function: calcium-transporting ATPase activity (GO:0005388);; Molecular Function: calmodulin binding (GO:0005516);; Cellular Component: plasma membrane (GO:0005886);; Biological Process: one-carbon metabolic process (GO:0006730);; Biological Process: calcium ion transport (GO:0006816);; Biological Process: cellular zinc i…	K01674|0|brp:103871697|alpha carbonic anhydrase 7-like; K01674 carbonic anhydrase [EC:4.2.1.1] (A)
RSG00957	0.119964	0.207019	0.101592	0	0.0521642	0.0571374	0	0.211231	0	--	--	--	--	--	--	--	--	--	Cellular Component: plasma membrane (GO:0005886);; Biological Process: response to nitrate (GO:0010167);; Molecular Function: nitrate transmembrane transporter activity (GO:0015112);; Biological Process: nitrate transport (GO:0015706);; Cellular Component: integral component of membrane (GO:0016021);; Biological Process: lateral root development (GO:0048527);; Biological Process: transmembrane tr…	K02575|0|brp:103871557|NRT2.2; high-affinity nitrate transporter 2.1-like; K02575 MFS transporter, NNP family, nitrate/nitrite transporter (A)
RSG00958	0	0.113674	0	0	0	0	0	0	0	--	--	--	--	--	--	--	--	--	Cellular Component: plasma membrane (GO:0005886);; Biological Process: response to nitrate (GO:0010167);; Molecular Function: nitrate transmembrane transporter activity (GO:0015112);; Biological Process: nitrate transport (GO:0015706);; Cellular Component: integral component of membrane (GO:0016021);; Biological Process: lateral root development (GO:0048527);; Biological Process: transmembrane tr…	K02575|0|brp:103836405|high-affinity nitrate transporter 2.1-like; K02575 MFS transporter, NNP family, nitrate/nitrite transporter (A)
RSG00959	53.1228	53.2149	60.4084	56.086	45.1636	42.4016	69.6963	66.4721	76.9814	0.806798	-0.122166	normal	0.150358	-0.466788	normal	0.0891756	-0.57302	normal	Molecular Function: lactoylglutathione lyase activity (GO:0004462);; Molecular Function: calmodulin binding (GO:0005516);; Cellular Component: cytosol (GO:0005829);; Biological Process: gluconeogenesis (GO:0006094);; Biological Process: glycolytic process (GO:0006096);; Cellular Component: chloroplast (GO:0009507);; Biological Process: response to salt stress (GO:0009651);; Biological Process: re…	K01759|1.46613e-163|brp:103871559|lactoylglutathione lyase; K01759 lactoylglutathione lyase [EC:4.4.1.5] (A)
RSG00960	19.0502	17.539	21.6481	21.7765	20.208	21.7733	14.2652	14.0204	11.8689	0.355158	-0.326746	normal	0.000272056	1.04078	up	0.0202165	0.733087	normal	Biological Process: single strand break repair (GO:0000012);; Molecular Function: DNA binding (GO:0003677);; Molecular Function: DNA ligase (ATP) activity (GO:0003910);; Molecular Function: ATP binding (GO:0005524);; Cellular Component: nucleus (GO:0005634);; Cellular Component: mitochondrion (GO:0005739);; Biological Process: DNA-dependent DNA replication (GO:0006261);; Biological Process: doubl…	K10747|0|brp:103871561|DNA ligase 1; K10747 DNA ligase 1 [EC:6.5.1.1 6.5.1.6 6.5.1.7] (A)
RSG00961	0	0	0	0	0	0	0	0	0	--	--	--	--	--	--	--	--	--	Molecular Function: monovalent cation:proton antiporter activity (GO:0005451);; Cellular Component: nucleus (GO:0005634);; Biological Process: sodium ion transport (GO:0006814);; Biological Process: lithium ion transport (GO:0010351);; Cellular Component: integral component of membrane (GO:0016021);; Biological Process: transmembrane transport (GO:0055085);;	--
RSG00962	0	0.0569324	0	0.033183	0	0	0.0350079	0	0	--	--	--	--	--	--	--	--	--	Cellular Component: nucleus (GO:0005634);; Molecular Function: sodium:proton antiporter activity (GO:0015385);; Cellular Component: integral component of membrane (GO:0016021);; Biological Process: sodium ion transmembrane transport (GO:0035725);;	--
RSG00963	0	0.53061	0	0	0	0	0.212937	0.543566	0.181605	--	--	--	--	--	--	--	--	--	--	--
RSG00964	0.162239	0.0830605	0	0.195507	0.210308	0	4.22345	0.511085	1.00445	--	--	--	--	--	--	--	--	--	Cellular Component: nucleosome (GO:0000786);; Molecular Function: DNA binding (GO:0003677);; Cellular Component: nucleus (GO:0005634);; Biological Process: nucleosome assembly (GO:0006334);; Molecular Function: protein heterodimerization activity (GO:0046982);;	K11252|1.43936e-102|brp:103871565|histone H2B.2; K11252 histone H2B (A)
RSG00965	0	0	0	0	0	0	0	0	0	--	--	--	--	--	--	--	--	--	--	--
RSG00966	1.43554	1.65705	0.745021	1.86724	1.23899	1.09968	10.2144	8.5537	5.7704	0.923199	0.177324	normal	1.68648e-07	-2.74508	down	3.21779e-07	-2.5513	down	Molecular Function: protein binding (GO:0005515);; Cellular Component: nucleus (GO:0005634);; Biological Process: tissue development (GO:0009888);; Biological Process: cell differentiation (GO:0030154);;	--
RSG00967	15.5526	18.9511	18.9949	14.881	16.716	11.874	22.2623	17.3169	23.7127	0.455837	-0.281188	normal	0.510071	-0.227309	normal	0.140989	-0.491869	normal	Molecular Function: nucleotide binding (GO:0000166);; Cellular Component: nucleus (GO:0005634);; Biological Process: protein targeting to vacuole (GO:0006623);; Molecular Function: zinc ion binding (GO:0008270);; Biological Process: gravitropism (GO:0009630);; Biological Process: vesicle-mediated transport (GO:0016192);;	--
RSG00968	222.815	185.895	202.236	228.513	209.541	195.185	189.629	140.171	134.313	0.859492	0.089078	normal	0.26728	0.372096	normal	0.149586	0.478598	normal	Molecular Function: nucleotide binding (GO:0000166);; Cellular Component: nucleus (GO:0005634);; Cellular Component: cytosol (GO:0005829);; Biological Process: nucleotide-sugar biosynthetic process (GO:0009226);; Molecular Function: UDP-glucuronate decarboxylase activity (GO:0048040);; Cellular Component: apoplast (GO:0048046);; Molecular Function: coenzyme binding (GO:0050662);;	K12449|0|brp:103836401|UDP-D-apiose/UDP-D-xylose synthase 2-like; K12449 UDP-apiose/xylose synthase (A)
RSG00969	14.7929	7.78306	22.403	8.72385	16.1046	12.6792	12.6168	10.1746	20.0707	0.854807	-0.194873	normal	0.969997	0.0418112	normal	0.883689	-0.135542	normal	Cellular Component: mitochondrion (GO:0005739);; Biological Process: carotenoid biosynthetic process (GO:0016117);; Biological Process: glucosinolate biosynthetic process (GO:0019761);; Biological Process: protein autophosphorylation (GO:0046777);;	--
RSG00970	6.4706	7.42317	8.00604	8.00091	7.44873	7.76251	9.56878	6.85567	7.17854	0.852548	-0.0943163	normal	0.71077	-0.142126	normal	0.583174	-0.220038	normal	Molecular Function: nucleotide binding (GO:0000166);; Molecular Function: DNA binding (GO:0003677);; Molecular Function: DNA-directed DNA polymerase activity (GO:0003887);; Biological Process: DNA replication (GO:0006260);; Biological Process: DNA methylation (GO:0006306);; Molecular Function: zinc ion binding (GO:0008270);; Biological Process: cell proliferation (GO:0008283);; Cellular Component…	K02324|0|brp:103871570|DNA polymerase epsilon catalytic subunit A; K02324 DNA polymerase epsilon subunit 1 [EC:2.7.7.7] (A)
RSG00971	40.3539	36.7571	40.2511	36.5897	31.6491	35.166	33.7593	34.0307	31.6039	0.667091	-0.183007	normal	0.399098	0.28512	normal	0.78389	0.120251	normal	Molecular Function: protein binding (GO:0005515);; Molecular Function: ATP binding (GO:0005524);; Cellular Component: nucleus (GO:0005634);; Cellular Component: multivesicular body (GO:0005771);; Biological Process: protein targeting to vacuole (GO:0006623);; Biological Process: fatty acid beta-oxidation (GO:0006635);; Biological Process: lipid transport (GO:0006869);; Biological Process: intra-G…	K12196|0|eus:EUTSA_v10007683mg|hypothetical protein; K12196 vacuolar protein-sorting-associated protein 4 (A)
RSG00972	12.0893	10.9012	9.93724	7.78392	7.35859	4.86698	8.14539	7.66812	8.0989	0.136168	-0.623632	normal	0.42514	0.352371	normal	0.629121	-0.253477	normal	Biological Process: protein glycosylation (GO:0006486);; Molecular Function: sialyltransferase activity (GO:0008373);; Cellular Component: integral component of Golgi membrane (GO:0030173);;	--
RSG00973	0.672901	0.783947	0.0836022	0.243991	0.350822	0.38124	0	0.0695659	0.0704427	--	--	--	--	--	--	--	--	--	Molecular Function: nucleic acid binding (GO:0003676);; Molecular Function: sequence-specific DNA binding transcription factor activity (GO:0003700);; Cellular Component: nuclear envelope (GO:0005635);; Biological Process: regulation of transcription, DNA-templated (GO:0006355);; Biological Process: nucleocytoplasmic transport (GO:0006913);; Biological Process: nucleus organization (GO:0006997);;…	--
RSG00974	1.38709	1.90501	0.815524	0.403567	0.434487	1.69827	0.492938	0.556405	0.286922	0.602594	-0.695112	normal	0.0182344	1.65166	normal	0.556247	0.981228	normal	Biological Process: cell fate specification (GO:0001708);; Cellular Component: nucleus (GO:0005634);; Cellular Component: cytoplasm (GO:0005737);; Biological Process: embryo development (GO:0009790);; Biological Process: auxin polar transport (GO:0009926);; Biological Process: leaf vascular tissue pattern formation (GO:0010305);; Biological Process: stem cell maintenance (GO:0019827);; Biological…	--
RSG00975	0	0	0	0	0.100311	0	0	0.15804	0	--	--	--	--	--	--	--	--	--	--	--
RSG00976	0.789376	1.83208	0.22938	1.19035	2.55587	1.81148	1.80641	1.92931	1.8256	0.337077	1.04018	normal	0.258329	-1.02647	normal	0.996367	0.0383378	normal	Molecular Function: catalytic activity (GO:0003824);; Cellular Component: nucleus (GO:0005634);; Biological Process: cellular response to phosphate starvation (GO:0016036);; Biological Process: galactolipid biosynthetic process (GO:0019375);; Biological Process: negative regulation of transcription, DNA-templated (GO:0045892);;	--
RSG00977	11.7086	13.6235	16.6074	24.4427	23.9943	20.307	18.9379	23.0798	18.4854	0.0726137	0.703266	normal	0.237704	-0.505083	normal	0.650647	0.218317	normal	Molecular Function: sequence-specific DNA binding transcription factor activity (GO:0003700);; Cellular Component: mitochondrion (GO:0005739);; Biological Process: regulation of transcription, DNA-templated (GO:0006355);; Molecular Function: ligase activity (GO:0016874);; Molecular Function: sequence-specific DNA binding (GO:0043565);;	--
RSG00978	7.45805	24.947	8.32443	3.13348	10.6638	8.92059	4.54166	5.46902	4.91935	0.600838	-0.816455	normal	0.227786	1.3965	normal	0.462	0.606144	normal	Molecular Function: DNA binding (GO:0003677);; Molecular Function: sequence-specific DNA binding transcription factor activity (GO:0003700);; Cellular Component: nucleus (GO:0005634);; Biological Process: response to mechanical stimulus (GO:0009612);; Biological Process: calcium-mediated signaling (GO:0019722);;	K14431|0|brp:103871579|transcription factor TGA2; K14431 transcription factor TGA (A)
RSG00979	0.480316	0.76763	0.909345	0.587631	0.329275	0.404926	0.439266	0.508145	0.134629	0.745645	-0.573152	normal	0.326984	1.13174	normal	--	--	--	Cellular Component: cytoplasm (GO:0005737);; Biological Process: xylem development (GO:0010089);; Biological Process: glucuronoxylan metabolic process (GO:0010413);; Molecular Function: Rac GTPase activator activity (GO:0030675);; Biological Process: positive regulation of Rac GTPase activity (GO:0032855);; Biological Process: xylan biosynthetic process (GO:0045492);;	--
RSG00980	6.69267	7.12609	9.08097	9.99589	10.0476	6.98441	7.38634	7.53368	6.01543	0.629861	0.259556	normal	0.822882	0.12268	normal	0.376821	0.402285	normal	Molecular Function: SNAP receptor activity (GO:0005484);; Cellular Component: mitochondrion (GO:0005739);; Biological Process: membrane fusion (GO:0006944);; Cellular Component: phragmoplast (GO:0009524);; Cellular Component: integral component of membrane (GO:0016021);;	--
RSG00981	86.1934	72.2382	91.5145	76.8571	50.6799	93.8137	41.8555	49.158	36.5963	0.82654	-0.127616	normal	0.00349304	0.942277	normal	0.0664276	0.833067	normal	Molecular Function: RNA binding (GO:0003723);; Molecular Function: structural constituent of ribosome (GO:0003735);; Cellular Component: plasma membrane (GO:0005886);; Biological Process: translation (GO:0006412);; Cellular Component: plasmodesma (GO:0009506);; Cellular Component: chloroplast (GO:0009507);; Biological Process: adaxial/abaxial pattern specification (GO:0009955);; Cellular Componen…	K02865|1.31957e-138|brp:103871582|60S ribosomal protein L10a-1; K02865 large subunit ribosomal protein L10Ae (A)
RSG00982	96.224	95.4485	75.7436	85.2957	76.2791	96.947	82.5914	96.8394	75.5217	0.924241	-0.0532993	normal	0.922018	0.0433333	normal	0.995252	0.0099064	normal	Biological Process: mitotic cell cycle (GO:0000278);; Cellular Component: cytoplasmic mRNA processing body (GO:0000932);; Cellular Component: nucleus (GO:0005634);; Biological Process: RNA processing (GO:0006396);; Biological Process: deadenylation-independent decapping of nuclear-transcribed mRNA (GO:0031087);; Molecular Function: protein homodimerization activity (GO:0042803);; Molecular Functi…	K12611|0|brp:103871583|mRNA-decapping enzyme-like protein; K12611 mRNA-decapping enzyme 1B [EC:3.-.-.-] (A)
RSG00983	1.54167	8.24774	0	0.420523	2.02006	0.238521	0.215977	1.87548	0	--	--	--	--	--	--	--	--	--	Cellular Component: nucleus (GO:0005634);;	K15365|4.41585e-63|brp:103871586|recQ-mediated genome instability protein 2; K15365 RecQ-mediated genome instability protein 2 (A)
RSG00984	4.37327	3.66087	4.68179	4.57748	4.09814	5.52488	5.9783	5.53324	4.776	0.756474	0.192749	normal	0.453073	-0.34888	normal	0.806325	-0.137128	normal	Cellular Component: chloroplast (GO:0009507);;	--
RSG00985	0	0	0	0	0	0	0	0	0	--	--	--	--	--	--	--	--	--	Molecular Function: phosphoprotein phosphatase activity (GO:0004721);; Molecular Function: iron ion binding (GO:0005506);; Molecular Function: manganese ion binding (GO:0030145);;	--
RSG00986	0.676705	0.0262973	0.349462	0.090787	0.425229	0.106563	0.0652758	0.525265	0.88768	0.807489	-0.719404	normal	0.753244	-0.585757	normal	0.49356	-1.27888	normal	Molecular Function: RNA binding (GO:0003723);; Molecular Function: RNA-directed DNA polymerase activity (GO:0003964);; Cellular Component: mitochondrion (GO:0005739);; Biological Process: RNA-dependent DNA replication (GO:0006278);;	--
RSG00987	0.0452243	0.0962511	0.112741	0	0	0.128579	0.0593576	0	0	--	--	--	--	--	--	--	--	--	Cellular Component: nucleus (GO:0005634);; Cellular Component: plasma membrane (GO:0005886);; Biological Process: response to aluminum ion (GO:0010044);; Molecular Function: malate transmembrane transporter activity (GO:0015140);; Biological Process: malate transport (GO:0015743);;	--
RSG00988	34.6469	17.7352	33.9402	24.6912	27.5607	19.6283	33.5587	21.9928	44.108	0.695557	-0.251767	normal	0.672801	-0.22563	normal	0.354143	-0.462641	normal	Molecular Function: sequence-specific DNA binding transcription factor activity (GO:0003700);; Cellular Component: nucleus (GO:0005634);; Biological Process: regulation of transcription, DNA-templated (GO:0006355);; Biological Process: abaxial cell fate specification (GO:0010158);;	--
RSG00989	67.3224	67.2052	87.2286	64.6432	55.0846	76.696	47.9475	56.33	43.1205	0.783309	-0.124051	normal	0.0581687	0.57326	normal	0.158612	0.468748	normal	Cellular Component: vacuolar membrane (GO:0005774);; Cellular Component: endoplasmic reticulum (GO:0005783);; Cellular Component: chloroplast (GO:0009507);; Biological Process: alkaloid biosynthetic process (GO:0009821);; Molecular Function: strictosidine synthase activity (GO:0016844);;	--
RSG00990	119.267	142.878	142.426	127.665	100.087	116.538	74.6797	65.6165	83.619	0.793721	-0.12443	normal	0.0138105	0.763466	normal	0.0480637	0.654047	normal	Cellular Component: mitochondrial respiratory chain complex II (GO:0005749);; Cellular Component: vacuolar membrane (GO:0005774);; Cellular Component: plastid (GO:0009536);; Biological Process: photorespiration (GO:0009853);;	--
RSG00992	30.2525	32.5012	23.3656	15.9005	15.8916	14.5963	34.9149	30.0135	29.6937	0.00107863	-0.941631	normal	0.815304	-0.0919727	normal	0.000943358	-1.01511	down	Molecular Function: ACP phosphopantetheine attachment site binding involved in fatty acid biosynthetic process (GO:0000036);; Biological Process: fatty acid biosynthetic process (GO:0006633);; Cellular Component: plastid (GO:0009536);; Molecular Function: acyl-[acyl-carrier-protein] hydrolase activity (GO:0016297);;	K10781|0|eus:EUTSA_v10007761mg|hypothetical protein; K10781 fatty acyl-ACP thioesterase B [EC:3.1.2.14 3.1.2.21] (A)
RSG00993	98.6654	77.576	144.18	107.042	109.974	121.949	84.9635	60.7949	105.502	0.911345	0.0640448	normal	0.295022	0.409627	normal	0.142906	0.48882	normal	Molecular Function: ATP binding (GO:0005524);; Cellular Component: chloroplast (GO:0009507);; Biological Process: photosynthesis (GO:0015979);; Biological Process: chlorophyll biosynthetic process (GO:0015995);; Molecular Function: magnesium chelatase activity (GO:0016851);; Molecular Function: nucleoside-triphosphatase activity (GO:0017111);;	K03404|0|brp:103871596|magnesium-chelatase subunit ChlD, chloroplastic; K03404 magnesium chelatase subunit D [EC:6.6.1.1] (A)
RSG00996	0	0	0	0	0	0	0	0	0	--	--	--	--	--	--	--	--	--	--	--
RSG00997	20.1633	11.7523	26.3979	13.5301	12.8683	13.242	8.05337	7.8689	14.2841	0.376784	-0.523075	normal	0.11741	0.903704	normal	0.361876	0.394116	normal	Biological Process: sulfur amino acid metabolic process (GO:0000096);; Molecular Function: protein binding (GO:0005515);; Biological Process: pentose-phosphate shunt (GO:0006098);; Biological Process: rRNA processing (GO:0006364);; Biological Process: glycine catabolic process (GO:0006546);; Biological Process: unsaturated fatty acid biosynthetic process (GO:0006636);; Biological Process: phospha…	K09839|0|brp:103871599|violaxanthin de-epoxidase, chloroplastic; K09839 violaxanthin de-epoxidase [EC:1.10.99.3] (A)
RSG00998	0.776363	2.57004	1.32474	1.96054	3.07489	2.03739	0.784759	1.20511	0.644454	0.550854	0.613395	normal	0.373473	0.881677	normal	0.0634337	1.52155	normal	Biological Process: cytokinesis by cell plate formation (GO:0000911);; Molecular Function: SNAP receptor activity (GO:0005484);; Cellular Component: plasma membrane (GO:0005886);; Biological Process: acetyl-CoA metabolic process (GO:0006084);; Biological Process: intracellular protein transport (GO:0006886);; Biological Process: membrane fusion (GO:0006944);; Biological Process: cell proliferatio…	K08486|0|brp:103871600|syntaxin-related protein KNOLLE; K08486 syntaxin 1B/2/3 (A)
RSG00999	4.04444	2.68934	3.93311	4.34447	3.76385	4.66343	11.266	9.50326	9.0026	0.816117	0.304006	normal	0.0148541	-1.52114	normal	0.0504964	-1.19972	normal	Biological Process: glycerol ether metabolic process (GO:0006662);; Molecular Function: electron carrier activity (GO:0009055);; Cellular Component: chloroplast stroma (GO:0009570);; Molecular Function: protein disulfide oxidoreductase activity (GO:0015035);; Molecular Function: oxidoreductase activity, acting on a sulfur group of donors, disulfide as acceptor (GO:0016671);; Cellular Component: c…	--
RSG01000	0	0	2.72127	0	0	0	0	0	0	--	--	--	--	--	--	--	--	--	Cellular Component: nucleus (GO:0005634);;	--
RSG01001	8.04644	7.35092	7.86953	7.21025	7.92562	6.94548	10.405	10.9669	10.7914	0.989109	0.0143283	normal	0.102461	-0.50438	normal	0.158751	-0.47262	normal	Biological Process: microtubule cytoskeleton organization (GO:0000226);; Biological Process: cytokinesis by cell plate formation (GO:0000911);; Molecular Function: DNA binding (GO:0003677);; Molecular Function: sequence-specific DNA binding transcription factor activity (GO:0003700);; Molecular Function: helicase activity (GO:0004386);; Molecular Function: ATP binding (GO:0005524);; Cellular Comp…	K10779|0|brp:103871701|transcriptional regulator ATRX; K10779 transcriptional regulator ATRX [EC:3.6.4.12] (A)
RSG01002	6.53078	14.7888	4.23041	17.3431	33.2972	21.0764	57.087	123.177	30.0293	0.0296521	1.51804	normal	0.0269966	-3.04564	normal	0.209552	-1.49353	normal	Molecular Function: threonine aldolase activity (GO:0004793);; Cellular Component: cytoplasm (GO:0005737);; Biological Process: threonine catabolic process (GO:0006567);; Biological Process: response to sucrose (GO:0009744);; Biological Process: response to fructose (GO:0009750);; Molecular Function: pyridoxal phosphate binding (GO:0030170);;	K01620|0|brp:103871606|probable low-specificity L-threonine aldolase 1; K01620 threonine aldolase [EC:4.1.2.5] (A)
RSG01003	30.2404	23.787	38.1616	32.6178	34.4008	32.4151	17.986	17.498	16.9819	0.800716	0.139135	normal	0.0355073	0.796578	normal	0.0085123	0.954632	normal	Biological Process: fatty acid metabolic process (GO:0006631);; Biological Process: response to stress (GO:0006950);; Cellular Component: chloroplast membrane (GO:0031969);;	--
RSG01004	8.76491	9.81969	7.4796	5.32908	14.7296	8.22749	0.648501	1.34732	5.03007	0.924241	0.111997	normal	0.000849864	1.92218	up	0.0493374	2.04886	normal	Molecular Function: protein serine/threonine kinase activity (GO:0004674);; Molecular Function: protein tyrosine kinase activity (GO:0004713);; Molecular Function: ATP binding (GO:0005524);; Cellular Component: nucleus (GO:0005634);; Biological Process: protein phosphorylation (GO:0006468);;	K08794|0|brp:103871608|phosphoenolpyruvate carboxylase kinase 1; K08794 calcium/calmodulin-dependent protein kinase I [EC:2.7.11.17] (A)
RSG01005	0	0	0	0	0	0	0	0	0	--	--	--	--	--	--	--	--	--	Biological Process: cellular amino acid metabolic process (GO:0006520);; Biological Process: gene expression (GO:0010467);; Biological Process: RNA metabolic process (GO:0016070);; Biological Process: cellular biosynthetic process (GO:0044249);; Biological Process: organic substance biosynthetic process (GO:1901576);;	--
RSG01006	24.8897	21.8767	19.8389	22.7322	22.8275	22.5979	24.6163	23.802	21.4706	0.914045	0.0604743	normal	0.720719	-0.137684	normal	0.907392	-0.0583204	normal	Molecular Function: DNA binding (GO:0003677);; Molecular Function: protein serine/threonine kinase activity (GO:0004674);; Cellular Component: nucleus (GO:0005634);; Cellular Component: plasma membrane (GO:0005886);; Molecular Function: ARF GTPase activator activity (GO:0008060);; Molecular Function: zinc ion binding (GO:0008270);; Biological Process: regulation of ARF GTPase activity (GO:0032312…	--
RSG01007	22.0917	20.3141	23.6349	28.1215	25.3296	23.7709	36.032	30.9469	31.4796	0.624062	0.216234	normal	0.124928	-0.503989	normal	0.487324	-0.27034	normal	Molecular Function: aspartic-type endopeptidase activity (GO:0004190);; Cellular Component: nucleus (GO:0005634);; Cellular Component: integral component of plasma membrane (GO:0005887);; Biological Process: regulation of DNA replication (GO:0006275);; Biological Process: DNA methylation (GO:0006306);; Biological Process: chromatin silencing (GO:0006342);; Biological Process: cell-cell signaling …	K04505|0|brp:103871613|presenilin-like protein At1g08700; K04505 presenilin 1 [EC:3.4.23.-] (A)
RSG01008	4.39532	6.32018	6.77905	5.52561	7.32284	6.94567	8.09238	8.89689	7.74792	0.795933	0.217272	normal	0.410477	-0.477679	normal	0.715408	-0.238951	normal	Cellular Component: nucleus (GO:0005634);;	--
RSG01009	5.43089	3.08711	4.33907	4.69651	5.21783	4.56197	5.90985	3.5189	5.41003	0.724239	0.180774	normal	0.669074	-0.204229	normal	1	-0.00792141	normal	Molecular Function: motor activity (GO:0003774);; Molecular Function: actin binding (GO:0003779);; Molecular Function: protein serine/threonine kinase activity (GO:0004674);; Molecular Function: signal transducer activity (GO:0004871);; Molecular Function: ATP binding (GO:0005524);; Cellular Component: nucleus (GO:0005634);; Biological Process: protein phosphorylation (GO:0006468);; Biological Pr…	K10357|0|brp:103871614|myosin-9; K10357 myosin V (A)
RSG01010	11.1422	9.15087	15.9776	9.212	8.63734	11.9446	10.8524	9.51796	9.83969	0.606369	-0.298957	normal	0.601499	0.269409	normal	0.997108	-0.0114232	normal	Molecular Function: GPI-anchor transamidase activity (GO:0003923);; Molecular Function: cysteine-type endopeptidase activity (GO:0004197);; Cellular Component: endoplasmic reticulum (GO:0005783);; Biological Process: proteolysis (GO:0006508);; Biological Process: sterol biosynthetic process (GO:0016126);; Biological Process: sphingoid biosynthetic process (GO:0046520);;	K05290|0|brp:103871616|putative GPI-anchor transamidase; K05290 phosphatidylinositol glycan, class K [EC:2.6.-.-] (A)
RSG01011	16.2952	15.8868	18.3194	17.3696	16.9188	15.6159	19.4904	23.1765	17.6079	0.990567	-0.0131887	normal	0.470587	-0.252916	normal	0.520386	-0.245547	normal	--	--
RSG01012	184.077	177.556	226.651	190.061	175.334	232.603	57.7243	63.8277	58.1457	0.917032	0.059203	normal	2.03287e-09	1.74807	up	3.94062e-10	1.82645	up	Cellular Component: nucleus (GO:0005634);; Biological Process: protein folding (GO:0006457);; Cellular Component: prefoldin complex (GO:0016272);; Molecular Function: unfolded protein binding (GO:0051082);; Molecular Function: chaperone binding (GO:0051087);;	K09550|3.18198e-76|brp:103871619|probable prefoldin subunit 4; K09550 prefoldin subunit 4 (A)
RSG01013	0	0	0	0	0	0	0	0	0	--	--	--	--	--	--	--	--	--	Cellular Component: nucleus (GO:0005634);;	--
RSG01014	0.000560139	4.13623e-05	0.000116389	0.0900769	2.4424e-08	0.000491845	0.555384	0.868565	0.43302	--	--	--	1.46659e-06	#NAME?	down	9.27448e-05	-4.56192	down	--	--
RSG01015	12.061	13.981	10.2397	13.5599	14.2075	12.1764	18.3568	20.5607	17.1089	0.743632	0.171826	normal	0.0660371	-0.645358	normal	0.231098	-0.453381	normal	Cellular Component: endoplasmic reticulum membrane (GO:0005789);; Cellular Component: plasma membrane (GO:0005886);; Biological Process: intracellular transport (GO:0046907);;	--
RSG01016	22.6434	31.7584	19.5681	40.6964	53.4917	52.8396	66.3363	101.518	57.1994	0.0325902	0.716121	normal	0.00219991	-1.42953	down	0.0991685	-0.688914	normal	Molecular Function: structural constituent of ribosome (GO:0003735);; Cellular Component: extracellular region (GO:0005576);; Cellular Component: ribosome (GO:0005840);; Biological Process: translation (GO:0006412);;	--
RSG01017	111.228	119.692	164.038	91.5386	82.8317	94.9369	51.9043	73.9924	52.4694	0.128179	-0.520321	normal	0.000266758	1.16524	up	0.0692577	0.665897	normal	Cellular Component: nucleosome (GO:0000786);; Biological Process: RNA methylation (GO:0001510);; Molecular Function: DNA binding (GO:0003677);; Cellular Component: nucleolus (GO:0005730);; Biological Process: nucleosome assembly (GO:0006334);; Biological Process: cell proliferation (GO:0008283);; Molecular Function: protein heterodimerization activity (GO:0046982);;	K11251|1.56445e-64|brp:103836372|probable histone H2AXa; K11251 histone H2A (A)
RSG01018	0.173484	0.228176	0.220559	0.322082	0.347003	0.246092	0.558436	0.718849	1.26788	--	--	--	0.0533519	-2.13898	normal	0.163858	-1.5755	normal	--	K04706|0|brp:103871629|uncharacterized LOC103871629; K04706 E3 SUMO-protein ligase PIAS1 [EC:6.3.2.-] (A)
RSG01019	2.40145	1.91047	2.56179	0.974243	1.33019	1.00326	0.349864	0.485305	0.634924	0.189186	-1.0226	normal	0.00181244	2.3502	up	0.160584	1.34774	normal	Molecular Function: sugar:proton symporter activity (GO:0005351);; Cellular Component: plasma membrane (GO:0005886);; Biological Process: response to water deprivation (GO:0009414);; Biological Process: response to salt stress (GO:0009651);; Cellular Component: plant-type vacuole membrane (GO:0009705);; Biological Process: response to abscisic acid (GO:0009737);; Molecular Function: monosaccharid…	--
RSG01020	10.8904	12.1187	10.6676	16.3032	11.1553	13.6648	18.1675	39.8285	12.5616	0.567473	0.281563	normal	0.260166	-1.04941	normal	0.432719	-0.741919	normal	Molecular Function: sugar:proton symporter activity (GO:0005351);; Cellular Component: endoplasmic reticulum (GO:0005783);; Cellular Component: plasma membrane (GO:0005886);; Biological Process: tryptophan catabolic process (GO:0006569);; Biological Process: response to water deprivation (GO:0009414);; Biological Process: systemic acquired resistance (GO:0009627);; Biological Process: response to…	--
RSG01021	1.76571	0.663596	2.11	1.96779	1.09348	1.34047	1.31384	3.86298	4.1939	1	-0.0454503	normal	0.18164	-1.12779	normal	0.162176	-1.1582	normal	Molecular Function: aspartic-type endopeptidase activity (GO:0004190);; Cellular Component: extracellular region (GO:0005576);; Biological Process: N-terminal protein myristoylation (GO:0006499);; Biological Process: proteolysis (GO:0006508);;	--
RSG01022	0	0	0	0	0	0	0	0	0	--	--	--	--	--	--	--	--	--	--	--
RSG01023	0	0	0	0	0	0	0	0	0	--	--	--	--	--	--	--	--	--	--	--
RSG01024	0	0	0	0	0	0	0	0	0	--	--	--	--	--	--	--	--	--	--	--
RSG01025	0	0	0	0	0	0	0	0	0	--	--	--	--	--	--	--	--	--	Biological Process: MAPK cascade (GO:0000165);; Molecular Function: DNA binding (GO:0003677);; Molecular Function: MAP kinase kinase kinase activity (GO:0004709);; Cellular Component: nucleus (GO:0005634);; Biological Process: response to cold (GO:0009409);; Biological Process: response to wounding (GO:0009611);; Biological Process: response to fungus (GO:0009620);; Biological Process: response t…	K13414|2.79156e-157|brp:103858480|mitogen-activated protein kinase kinase kinase 1-like; K13414 mitogen-activated protein kinase kinase kinase 1, plant [EC:2.7.11.25] (A)
RSG01026	0	0	0	0	0	0.0141555	0	0	0	--	--	--	--	--	--	--	--	--	--	--
RSG01027	159.621	137.939	165.697	100.117	84.1605	109.707	70.9716	72.8769	74.7102	0.0335932	-0.636331	normal	7.7014e-05	1.15088	up	0.0994726	0.531917	normal	Cellular Component: cytosol (GO:0005829);; Cellular Component: plasma membrane (GO:0005886);; Cellular Component: plasmodesma (GO:0009506);;	--
RSG01028	35.1524	32.6567	37.6986	37.0946	38.0044	36.4361	46.7802	43.6662	58.0484	0.824274	0.106365	normal	0.123243	-0.47766	normal	0.313353	-0.354688	normal	Molecular Function: ATP binding (GO:0005524);; Biological Process: ATP catabolic process (GO:0006200);; Biological Process: protein N-linked glycosylation (GO:0006487);; Cellular Component: chloroplast (GO:0009507);; Biological Process: gravitropism (GO:0009630);; Molecular Function: ATPase activity (GO:0016887);;	--
RSG01029	0	0	0	0	0	0	0	0	0	--	--	--	--	--	--	--	--	--	--	--
RSG01030	4.86512	6.19088	5.48641	3.38739	4.65466	3.98644	7.17336	6.14705	5.82127	0.422577	-0.445042	normal	0.778363	-0.156746	normal	0.227047	-0.581048	normal	Molecular Function: protein binding (GO:0005515);; Cellular Component: endosome (GO:0005768);; Cellular Component: Golgi apparatus (GO:0005794);; Cellular Component: trans-Golgi network (GO:0005802);; Biological Process: multidimensional cell growth (GO:0009825);; Biological Process: cell tip growth (GO:0009932);; Biological Process: xyloglucan biosynthetic process (GO:0009969);; Biological Proce…	K08238|0|brp:103858760|putative glycosyltransferase 2; K08238 xyloglucan 6-xylosyltransferase [EC:2.4.2.39] (A)
RSG01031	98.2005	143.984	52.3418	648.363	312.104	570.077	531.1	2558.03	200.636	0.000402619	2.42208	up	0.198411	-3.53254	normal	0.623586	-1.07777	normal	Molecular Function: glutathione transferase activity (GO:0004364);; Cellular Component: vacuole (GO:0005773);; Cellular Component: cytosol (GO:0005829);; Cellular Component: plasma membrane (GO:0005886);; Biological Process: toxin catabolic process (GO:0009407);; Biological Process: response to cold (GO:0009409);; Cellular Component: plasmodesma (GO:0009506);; Cellular Component: chloroplast stro…	K00799|2.20486e-133|brp:103858759|glutathione S-transferase F2-like; K00799 glutathione S-transferase [EC:2.5.1.18] (A)
RSG01033	3.11081	1.91687	3.30343	3.80402	3.16171	2.88055	5.74395	3.5733	5.66775	0.817095	0.201156	normal	0.0968568	-0.839049	normal	0.23321	-0.624727	normal	--	--
[truncated: 63,257 more rows]
