# Supplementary material for: Genome-wide transcriptome profiling of radish (Raphanus sativus L.) in response to vernalization
Source: PLoS One. 2017 May 12;12(5):e0177594. doi: 10.1371/journal.pone.0177594 (PMC5428929; doi:10.1371/journal.pone.0177594)
Supplement: S3 Table — (XLS) [file pone.0177594.s007.xls]

## Sheet: S3 table
Table S3. Top three GO terms of the three main groups ranked by the KS value.
VE vs. VL	GO ID	Term	KS value
cellular component	5739	mitochondrion	3e-05
	5771	multivesicular body	0.00018
	44446	intracellular organelle part	0.00035
molecular function	5515	protein binding	5.9e-17
	5524	ATP binding	8.3e-13
	3700	sequence-specific DNA binding transcription factor activity	6.2e-08
biological process	9220	pyrimidine ribonucleotide biosynthetic process	7.2e-11
	44699	single-organism process	1.5e-10
	44763	single-organism cellular process	9.3e-10
RT vs. VE	GO ID	Term	KS value
cellular component	22625	cytosolic large ribosomal subunit	< 1E-30
	5730	nucleolus	< 1E-30
	22627	cytosolic small ribosomal subunit	3.7e-20
molecular function	3735	structural constituent of ribosome	< 1E-30
	5515	protein binding	2e-18
	5524	ATP binding	3.3e-12
biological process	1510	RNA methylation	< 1E-30
	9220	pyrimidine ribonucleotide biosynthetic process	< 1E-30
	6412	translation	< 1E-30
RT vs. VL	GO ID	Term	KS value
cellular component	9941	chloroplast envelope	7.6e-06
	9570	chloroplast stroma	2.2e-05
	5774	vacuolar membrane	9.1e-05
molecular function	5515	protein binding	4.4e-17
	5524	ATP binding	5.2e-11
	3700	sequence-specific DNA binding transcription factor activity	1.4e-07
biological process	44699	single-organism process	7.9e-09
	45893	positive regulation of transcription, DNA-templated	5.6e-08
	44763	single-organism cellular process	1.6e-06
