# Supplementary material for: Genome-wide transcriptome profiling of radish (Raphanus sativus L.) in response to vernalization
Source: PLoS One. 2017 May 12;12(5):e0177594. doi: 10.1371/journal.pone.0177594 (PMC5428929; doi:10.1371/journal.pone.0177594)
Supplement: S6 Table — (XLS) [file pone.0177594.s010.xls]

## Sheet: S6 table
Table S6. Genes that showed expression difference in VE vs. VL and not in RT vs. VE with |log2Ratio| ≥ 4.
Gane ID	Annotation	Log2Ratio in VE vs. VL
RSG06606	RmlC-like cupins superfamily protein	infinite
RSG20225	Pathogenesis-related thaumatin superfamily protein	infinite
RSG41659	CA2 CA18 BETA CA2 | carbonic anhydrase 2	infinite
RSG50475	GRP20 ATGRP20 | glycine-rich protein 20	7.55
RSG25390	TGG1 BGLU38 | thioglucoside glucohydrolase 1	7.35
RSG51617	unknown protein; Has 0 Blast hits to 0 proteins in 0 species (source: NCBI BLink).	6.69
RSG18487	PDF1.2b | plant defensin 1.2b	6.41
RSG52260	BGL2 PR2 BG2 PR-2 | beta-13-glucanase 2	6.39
RSG55934	CESA9 CESA09 | cellulose synthase A9	5.32
RSG16377	ATPRP2 PRP2 | proline-rich protein 2	5.23
RSG49322	LOX2 ATLOX2 | lipoxygenase 2	5.14
RSG13279	Terpenoid cyclases/Protein prenyltransferases superfamily protein	5.13
newGene_293	flowering locus T variant 6	4.94
RSG21793	CYP76C1 | cytochrome P450 family 76 subfamily C polypeptide 1	4.87
RSG29104	PYL6 RCAR9 | PYR1-like 6	4.68
RSG07775	Leucine-rich repeat transmembrane protein kinase	4.58
RSG33361	CA1 | carbonic anhydrase 1	4.36
RSG45834	Major facilitator superfamily protein	4.31
RSG30885	BG3 | beta-13-glucanase 3	4.11
RSG20984	CYP90D1 | cytochrome P450 family 90 subfamily D polypeptide 1	4.03
RSG30993	Chitinase family protein	4.01
RSG16179	TIM13 | translocase of the inner mitochondrial membrane 13	infinitesimal
RSG19723	ATPAP1 PAP1 LPP1 ATLPP1 | phosphatidic acid phosphatase 1	infinitesimal
RSG39232	Ribosomal protein S5/Elongation factor G/III/V family protein	infinitesimal
RSG50745	no data	infinitesimal
RSG26210	IAA32 | indole-3-acetic acid inducible 32	-5.62
RSG17453	GL2 | HD-ZIP IV family of homeobox-leucine zipper protein with lipid-binding START domain	-5.62
RSG05943	F-box and associated interaction domains-containing protein	-5.37
RSG25633	MEE23 EDA28 | FAD-binding Berberine family protein	-5.34
RSG32601	Saposin-like aspartyl protease family protein	-5.02
RSG08073	HSP70 ATHSP70 | heat shock protein 70	-4.86
RSG45503	glycosyl hydrolase family 10 protein / carbohydrate-binding domain-containing protein	-4.73
RSG35761	Protein of unknown function (DUF1012)	-4.66
newGene_949	no data	-4.61
RSG23443	FKBP16-2 | FK506-binding protein 16-2	-4.33
RSG28206	SMP1 | Pre-mRNA splicing Prp18-interacting factor	-4.05
RSG14287	ROF2 ATFKBP65 FKBP65 | FKBP-type peptidyl-prolyl cis-trans isomerase family protein	-4.03
